# Supplementary material
Source: PubMed Central journal article supplement (PMC6640051)
Supplement: EMS83577-supplement-Appendix.pdf [file EMS83577-supplement-Appendix.pdf]

## Appendix A: Supplementary tables and figure

Table A.1. Line parameters of assigned lines in L483

| Molecule                                | Transition                                                                                                  | Frequency<br>(MHz) | $V_{\text{LSR}}$<br>(km s <sup>-1</sup> ) | $\Delta v$<br>(km s <sup>-1</sup> ) | $T_A^*$ peak<br>(K) | $\int T_A^* dv$<br>(K km s <sup>-1</sup> ) | Notes   |
|-----------------------------------------|-------------------------------------------------------------------------------------------------------------|--------------------|-------------------------------------------|-------------------------------------|---------------------|--------------------------------------------|---------|
| H <sub>2</sub> C <sub>4</sub>           | 9 <sub>1,9</sub> -8 <sub>1,8</sub>                                                                          | 80046.678          | 5.29(3)                                   | 0.46(3)                             | 0.046               | 0.023(2)                                   |         |
| <i>c</i> -HCC <sup>13</sup> CH          | 2 <sub>0,2</sub> -1 <sub>1,1</sub>                                                                          | 80047.537          | 5.26(3)                                   | 0.40(3)                             | 0.295               | 0.126(12)                                  |         |
| H <sub>2</sub> CCO                      | 4 <sub>1,4</sub> -3 <sub>1,3</sub>                                                                          | 80076.652          | 5.30(3)                                   | 0.47(3)                             | 0.139               | 0.069(6)                                   |         |
| H <sub>2</sub> NCO <sup>+</sup>         | 4 <sub>1,4</sub> -3 <sub>1,3</sub>                                                                          | 80246.484          | 5.16(3)                                   | 0.41(11)                            | 0.005               | 0.0022(2)                                  |         |
| <i>c</i> -C <sub>3</sub> HD             | 3 <sub>2,2</sub> -3 <sub>0,3</sub>                                                                          | 80255.666          | 5.25(3)                                   | 0.36(7)                             | 0.006               | 0.0023(2)                                  | 5       |
| HSCN                                    | 7 <sub>0,7</sub> -6 <sub>0,6</sub>                                                                          | 80283.167          | 5.30(3)                                   | 0.49(9)                             | 0.013               | 0.007(1)                                   |         |
| DCO <sub>2</sub> <sup>+</sup>           | 4 <sub>0,4</sub> -3 <sub>0,3</sub>                                                                          | 80288.759          | 5.30(3)                                   | 0.37(3)                             | 0.014               | 0.0053(5)                                  |         |
| H <sub>2</sub> C <sub>4</sub>           | 9 <sub>0,9</sub> -8 <sub>0,8</sub>                                                                          | 80383.887          | 5.17(3)                                   | 0.42(3)                             | 0.023               | 0.010(1)                                   |         |
| <i>l</i> -C <sub>3</sub> H              | <sup>2</sup> Π <sub>3/2</sub> <i>J</i> = 7/2-5/2 <i>F</i> = 4-3 <i>f</i>                                    | 80388.107          | 5.39(3)                                   | 0.66(8)                             | 0.009               | 0.0062(6)                                  |         |
| <i>l</i> -C <sub>3</sub> H              | <sup>2</sup> Π <sub>3/2</sub> <i>J</i> = 7/2-5/2 <i>F</i> = 4-3 <i>e</i>                                    | 80420.646          | 5.32(3)                                   | 0.65(16)                            | 0.004               | 0.003(1)                                   | 5       |
| CH <sub>3</sub> NC                      | 4 <sub>0</sub> -3 <sub>0</sub>                                                                              | 80421.910          | 5.32(3)                                   | 0.45(13)                            | 0.007               | 0.003(1)                                   | 5       |
| CH <sub>2</sub> CN                      | 4 <sub>0,4</sub> -3 <sub>0,3</sub> <i>J</i> = 9/2-7/2 <i>F</i> <sub>1</sub> = 11/2-9/2 <i>F</i> = 13/2-11/2 | 80480.384          |                                           |                                     | 0.095               | 0.076(7)                                   | 2, 3, 6 |
| CH <sub>2</sub> CN                      | 4 <sub>0,4</sub> -3 <sub>0,3</sub> <i>J</i> = 9/2-7/2 <i>F</i> <sub>1</sub> = 11/2-9/2 <i>F</i> = 11/2-9/2  | 80480.384          |                                           |                                     |                     |                                            | 2, 3    |
| CH <sub>2</sub> CN                      | 4 <sub>0,4</sub> -3 <sub>0,3</sub> <i>J</i> = 9/2-7/2 <i>F</i> <sub>1</sub> = 11/2-9/2 <i>F</i> = 9/2-7/2   | 80480.384          |                                           |                                     |                     |                                            | 2, 3    |
| CH <sub>2</sub> CN                      | 4 <sub>0,4</sub> -3 <sub>0,3</sub> <i>J</i> = 9/2-7/2 <i>F</i> <sub>1</sub> = 11/2-9/2 <i>F</i> = 7/2-5/2   | 80481.644          | 5.28(13)                                  | 0.65(18)                            | 0.027               | 0.019(2)                                   | 2       |
| CH <sub>2</sub> CN                      | 4 <sub>0,4</sub> -3 <sub>0,3</sub> <i>J</i> = 9/2-7/2 <i>F</i> <sub>1</sub> = 11/2-9/2 <i>F</i> = 9/2-7/2   | 80482.225          | 5.34(13)                                  | 0.62(18)                            | 0.035               | 0.023(2)                                   | 2       |
| CH <sub>2</sub> CN                      | 4 <sub>0,4</sub> -3 <sub>0,3</sub> <i>J</i> = 9/2-7/2 <i>F</i> <sub>1</sub> = 9/2-7/2 <i>F</i> = 11/2-9/2   | 80483.076          |                                           |                                     |                     |                                            | 2       |
| CH <sub>2</sub> CN                      | 4 <sub>0,4</sub> -3 <sub>0,3</sub> <i>J</i> = 9/2-7/2 <i>F</i> <sub>1</sub> = 7/2-5/2 <i>F</i> = 5/2-3/2    | 80483.076          |                                           |                                     |                     |                                            | 2       |
| CH <sub>2</sub> CN                      | 4 <sub>0,4</sub> -3 <sub>0,3</sub> <i>J</i> = 9/2-7/2 <i>F</i> <sub>1</sub> = 7/2-5/2 <i>F</i> = 7/2-5/2    | 80483.850          | 5.41(14)                                  | 0.54(27)                            | 0.017               | 0.010(4)                                   | 2       |
| CH <sub>2</sub> CN                      | 4 <sub>0,4</sub> -3 <sub>0,3</sub> <i>J</i> = 9/2-7/2 <i>F</i> <sub>1</sub> = 7/2-5/2 <i>F</i> = 9/2-7/2    | 80484.898          | 5.30(5)                                   | 0.49(17)                            | 0.036               | 0.019(5)                                   |         |
| CH <sub>2</sub> CN                      | 4 <sub>0,4</sub> -3 <sub>0,3</sub> <i>J</i> = 7/2-5/2 <i>F</i> <sub>1</sub> = 7/2-5/2 <i>F</i> = 9/2-7/2    | 80487.270          | 5.41(3)                                   | 0.50(13)                            | 0.037               | 0.020(5)                                   | 2       |
| CH <sub>2</sub> CN                      | 4 <sub>0,4</sub> -3 <sub>0,3</sub> <i>J</i> = 7/2-5/2 <i>F</i> <sub>1</sub> = 7/2-5/2 <i>F</i> = 7/2-5/2    | 80488.530          | 5.32(13)                                  | 0.53(18)                            | 0.027               | 0.015(2)                                   | 2       |
| CH <sub>2</sub> CN                      | 4 <sub>0,4</sub> -3 <sub>0,3</sub> <i>J</i> = 7/2-5/2 <i>F</i> <sub>1</sub> = 7/2-5/2 <i>F</i> = 5/2-3/2    | 80489.581          | 5.22(13)                                  | 0.39(18)                            | 0.018               | 0.008(2)                                   | 2       |
| CH <sub>2</sub> CN                      | 4 <sub>0,4</sub> -3 <sub>0,3</sub> <i>J</i> = 7/2-5/2 <i>F</i> <sub>1</sub> = 9/2-7/2 <i>F</i> = 11/2-9/2   | 80490.261          | 5.30(13)                                  | 0.38(18)                            | 0.047               | 0.019(2)                                   | 2, 3    |
| CH <sub>2</sub> CN                      | 4 <sub>0,4</sub> -3 <sub>0,3</sub> <i>J</i> = 7/2-5/2 <i>F</i> <sub>1</sub> = 9/2-7/2 <i>F</i> = 9/2-7/2    | 80490.261          |                                           |                                     |                     |                                            | 2, 3    |
| CH <sub>2</sub> CN                      | 4 <sub>0,4</sub> -3 <sub>0,3</sub> <i>J</i> = 7/2-5/2 <i>F</i> <sub>1</sub> = 9/2-7/2 <i>F</i> = 9/2-7/2    | 80490.711          | 5.29(13)                                  | 0.42(18)                            | 0.036               | 0.016(2)                                   | 2       |
| CH <sub>2</sub> CN                      | 4 <sub>0,4</sub> -3 <sub>0,3</sub> <i>J</i> = 7/2-5/2 <i>F</i> <sub>1</sub> = 9/2-7/2 <i>F</i> = 7/2-5/2    | 80491.263          | 5.35(13)                                  | 0.60(18)                            | 0.028               | 0.018(2)                                   | 2, 3    |
| CH <sub>2</sub> CN                      | 4 <sub>0,4</sub> -3 <sub>0,3</sub> <i>J</i> = 7/2-5/2 <i>F</i> <sub>1</sub> = 5/2-3/2 <i>F</i> = 7/2-5/2    | 80491.263          |                                           |                                     |                     |                                            | 2, 3    |
| CH <sub>2</sub> CN                      | 4 <sub>0,4</sub> -3 <sub>0,3</sub> <i>J</i> = 7/2-5/2 <i>F</i> <sub>1</sub> = 5/2-3/2 <i>F</i> = 3/2-1/2    | 80491.263          |                                           |                                     |                     |                                            | 2, 3    |
| HCS                                     | 2 <sub>0,2</sub> -1 <sub>0,1</sub> <i>J</i> = 5/2-3/2 <i>F</i> = 3-2                                        | 80553.516          | 5.39(3)                                   | 0.60(5)                             | 0.015               | 0.009(1)                                   |         |
| HCS                                     | 2 <sub>0,2</sub> -1 <sub>0,1</sub> <i>J</i> = 5/2-3/2 <i>F</i> = 2-1                                        | 80565.596          | 5.32(7)                                   | 0.77(8)                             | 0.012               | 0.010(1)                                   |         |
| CH <sub>2</sub> DCCH                    | 5 <sub>1,5</sub> -4 <sub>1,4</sub>                                                                          | 80577.159          | 5.26(18)                                  | 0.44(3)                             | 0.101               | 0.048(4)                                   |         |
| HCS                                     | 2 <sub>0,2</sub> -1 <sub>0,1</sub> <i>J</i> = 3/2-1/2 <i>F</i> = 2-1                                        | 80596.409          | 5.49(3)                                   | 0.96(13)                            | 0.010               | 0.010(1)                                   |         |
| HCS                                     | 2 <sub>0,2</sub> -1 <sub>0,1</sub> <i>J</i> = 3/2-1/2 <i>F</i> = 1-0                                        | 80611.994          | 5.32(6)                                   | 1.07(25)                            | 0.005               | 0.006(1)                                   |         |
| <i>c</i> -HCC <sup>13</sup> CH          | 2 <sub>1,2</sub> -1 <sub>1,1</sub>                                                                          | 80616.890          | 5.21(3)                                   | 0.52(7)                             | 0.011               | 0.006(1)                                   |         |
| HCS                                     | 2 <sub>0,2</sub> -1 <sub>0,1</sub> <i>J</i> = 3/2-1/2 <i>F</i> = 1-1                                        | 80618.820          | 5.51(4)                                   | 0.66(22)                            | 0.004               | 0.003(1)                                   | 5       |
| H <sub>2</sub> C <sub>4</sub>           | 9 <sub>1,8</sub> -8 <sub>1,7</sub>                                                                          | 80718.829          | 5.29(13)                                  | 0.56(18)                            | 0.038               | 0.022(2)                                   |         |
| <i>c</i> -C <sub>3</sub> H <sub>2</sub> | 4 <sub>2,2</sub> -4 <sub>1,3</sub>                                                                          | 80723.180          | 5.28(13)                                  | 0.66(18)                            | 0.039               | 0.027(2)                                   |         |
| <i>c</i> -HCC <sup>13</sup> CH          | 3 <sub>1,2</sub> -3 <sub>0,3</sub>                                                                          | 80775.347          | 5.30(3)                                   | 0.58(5)                             | 0.016               | 0.010(1)                                   |         |
| H <sub>2</sub> CCO                      | 4 <sub>0,4</sub> -3 <sub>0,3</sub>                                                                          | 80832.117          | 5.26(3)                                   | 0.58(3)                             | 0.069               | 0.043(4)                                   |         |
| CH <sub>2</sub> DCCH                    | 5 <sub>2,4</sub> -4 <sub>2,3</sub>                                                                          | 80898.934          | 5.30(9)                                   | 0.63(6)                             | 0.018               | 0.012(1)                                   |         |
| CH <sub>2</sub> DCCH                    | 5 <sub>2,3</sub> -4 <sub>2,2</sub>                                                                          | 80901.166          | 5.26(15)                                  | 0.57(8)                             | 0.015               | 0.009(1)                                   |         |
| CH <sub>2</sub> DCCH                    | 5 <sub>0,5</sub> -4 <sub>0,4</sub>                                                                          | 80902.226          | 5.26(3)                                   | 0.47(3)                             | 0.178               | 0.088(8)                                   |         |
| H <sub>2</sub> NCO <sup>+</sup>         | 4 <sub>0,4</sub> -3 <sub>0,3</sub>                                                                          | 80906.933          | 5.31(17)                                  | 0.55(17)                            | 0.005               | 0.003(1)                                   |         |
| C <sub>3</sub> S                        | 14-13                                                                                                       | 80928.180          | 5.29(3)                                   | 0.50(3)                             | 0.099               | 0.053(5)                                   |         |
| C <sup>13</sup> CS                      | 6 <sub>7</sub> -5 <sub>6</sub> <i>F</i> = 8-7                                                               | 81142.367          | 5.06(3)                                   | 0.47(7)                             | 0.011               | 0.006(1)                                   |         |
| C <sup>13</sup> CS                      | 6 <sub>7</sub> -5 <sub>6</sub> <i>F</i> = 7-6                                                               | 81143.302          | 5.68(3)                                   | 0.45(9)                             | 0.009               | 0.004(1)                                   |         |
| <i>c</i> -HC <sup>13</sup> CCH          | 2 <sub>0,2</sub> -1 <sub>1,1</sub>                                                                          | 81150.881          | 5.26(10)                                  | 0.48(4)                             | 0.019               | 0.010(1)                                   |         |
| HSC                                     | 2 <sub>0,2</sub> -1 <sub>0,1</sub> <i>J</i> = 3/2-1/2 <i>F</i> = 2-1                                        | 81194.075          | 5.36(3)                                   | 0.72(14)                            | 0.006               | 0.005(1)                                   |         |
| HSC                                     | 2 <sub>0,2</sub> -1 <sub>0,1</sub> <i>J</i> = 5/2-3/2 <i>F</i> = 3-2                                        | 81199.988          | 5.39(3)                                   | 0.43(8)                             | 0.008               | 0.004(1)                                   | 2       |
| CH <sub>2</sub> CN                      | 4 <sub>1,3</sub> -3 <sub>1,2</sub> <i>J</i> = 7/2-5/2 <i>F</i> = 9/2-7/2                                    | 81206.601          | 5.31(3)                                   | 0.56(6)                             | 0.010               | 0.0062(6)                                  |         |
| CH <sub>2</sub> CN                      | 4 <sub>1,3</sub> -3 <sub>1,2</sub> <i>J</i> = 7/2-5/2 <i>F</i> = 7/2-5/2                                    | 81207.379          | 5.33(3)                                   | 0.44(5)                             | 0.009               | 0.0042(4)                                  |         |
| CH <sub>2</sub> CN                      | 4 <sub>1,3</sub> -3 <sub>1,2</sub> <i>J</i> = 7/2-5/2 <i>F</i> = 5/2-3/2                                    | 81208.302          | 5.22(4)                                   | 0.67(12)                            | 0.006               | 0.005(1)                                   |         |
| CH <sub>2</sub> DCCH                    | 5 <sub>1,4</sub> -4 <sub>1,3</sub>                                                                          | 81228.145          | 5.27(3)                                   | 0.47(3)                             | 0.098               | 0.048(4)                                   |         |
| CH <sub>2</sub> CN                      | 4 <sub>1,3</sub> -3 <sub>1,2</sub> <i>J</i> = 9/2-7/2                                                       | 81232.654          | 5.37(11)                                  | 0.97(6)                             | 0.015               | 0.016(1)                                   | 6       |
| NCO                                     | <sup>2</sup> Π <sub>3/2</sub> <i>J</i> = 7/2-5/2 <i>F</i> = 9/2-7/2 <i>e</i>                                | 81404.300          | 5.30(3)                                   | 0.69(11)                            | 0.008               | 0.006(1)                                   |         |
| NCO                                     | <sup>2</sup> Π <sub>3/2</sub> <i>J</i> = 7/2-5/2 <i>F</i> = 9/2-7/2 <i>f</i>                                | 81404.813          | 5.38(3)                                   | 0.56(7)                             | 0.010               | 0.006(1)                                   |         |
| NCO                                     | <sup>2</sup> Π <sub>3/2</sub> <i>J</i> = 7/2-5/2 <i>F</i> = 7/2-5/2 <i>e</i>                                | 81413.120          | 5.39(3)                                   | 0.49(13)                            | 0.006               | 0.0031(3)                                  |         |
| NCO                                     | <sup>2</sup> Π <sub>3/2</sub> <i>J</i> = 7/2-5/2 <i>F</i> = 7/2-5/2 <i>f</i>                                | 81413.573          | 5.28(4)                                   | 0.66(13)                            | 0.007               | 0.005(1)                                   |         |
| NCO                                     | <sup>2</sup> Π <sub>3/2</sub> <i>J</i> = 7/2-5/2 <i>F</i> = 5/2-3/2 <i>e</i>                                | 81418.385          | 5.25(3)                                   | 0.44(13)                            | 0.006               | 0.003(1)                                   | 5       |
| NCO                                     | <sup>2</sup> Π <sub>3/2</sub> <i>J</i> = 7/2-5/2 <i>F</i> = 5/2-3/2 <i>f</i>                                | 81418.884          | 5.39(3)                                   | 0.35(16)                            | 0.004               | 0.0015(1)                                  | 5       |
| CH <sub>3</sub> C <sub>4</sub> H        | 20 <sub>1</sub> -19 <sub>1</sub>                                                                            | 81426.316          | 5.27(3)                                   | 0.62(14)                            | 0.008               | 0.005(1)                                   |         |
| CH <sub>3</sub> C <sub>4</sub> H        | 20 <sub>0</sub> -19 <sub>0</sub>                                                                            | 81427.108          | 5.27(3)                                   | 0.48(8)                             | 0.010               | 0.005(1)                                   |         |

Table A.1. continued.

| Molecule                                  | Transition                                                                     | Frequency<br>(MHz) | $V_{LSR}$<br>(km s <sup>-1</sup> ) | $\Delta v$<br>(km s <sup>-1</sup> ) | $T_A^*$ peak<br>(K) | $\int T_A^* dv$<br>(K km s <sup>-1</sup> ) | Notes |
|-------------------------------------------|--------------------------------------------------------------------------------|--------------------|------------------------------------|-------------------------------------|---------------------|--------------------------------------------|-------|
| HNO                                       | 1 <sub>0,1</sub> -0 <sub>0,0</sub>                                             | 81477.490          | 5.15(3)                            | 0.57(3)                             | 0.073               | 0.044(4)                                   |       |
| C <sub>2</sub> S                          | 6 <sub>7</sub> -5 <sub>6</sub>                                                 | 81505.170          | 5.19(3)                            | 0.52(3)                             | 0.794               | 0.439(43)                                  |       |
| HCCCHO                                    | 2 <sub>1,2</sub> -1 <sub>0,1</sub>                                             | 81525.876          | 5.28(3)                            | 0.38(19)                            | 0.010               | 0.004(1)                                   |       |
| HC <sup>13</sup> CCN                      | 9-8                                                                            | 81534.111          | 5.31(3)                            | 0.50(3)                             | 0.095               | 0.050(5)                                   |       |
| HCC <sup>13</sup> CN                      | 9-8                                                                            | 81541.981          | 5.29(3)                            | 0.51(3)                             | 0.101               | 0.055(5)                                   |       |
| H <sub>2</sub> NCO <sup>+</sup>           | 4 <sub>1,3</sub> -3 <sub>1,2</sub>                                             | 81565.552          | 5.22(3)                            | 0.61(23)                            | 0.007               | 0.004(1)                                   |       |
| DNCO                                      | 4 <sub>0,4</sub> -3 <sub>0,3</sub>                                             | 81571.913          | 5.34(3)                            | 0.47(3)                             | 0.065               | 0.032(3)                                   |       |
| H <sub>2</sub> CCO                        | 4 <sub>1,3</sub> -3 <sub>1,2</sub>                                             | 81586.230          | 5.28(3)                            | 0.54(3)                             | 0.131               | 0.075(7)                                   |       |
| HC <sub>3</sub> N                         | 9-8 $F=9-9$                                                                    | 81879.925          | 5.28(54)                           | 0.46(22)                            | 0.040               | 0.020(9)                                   |       |
| HC <sub>3</sub> N                         | 9-8                                                                            | 81881.468          |                                    |                                     | 3.049               | 2.143(214)                                 | 1     |
| HC <sub>3</sub> N                         | 9-8 $F=8-8$                                                                    | 81883.174          | 5.28(54)                           | 0.50(24)                            | 0.036               | 0.019(9)                                   |       |
| <i>c</i> -C <sub>3</sub> H <sub>2</sub>   | 2 <sub>0,2</sub> -1 <sub>1,1</sub>                                             | 82093.544          | 5.31(3)                            | 0.54(3)                             | 1.601               | 0.913(91)                                  |       |
| HNCS                                      | 7 <sub>0,7</sub> -6 <sub>0,6</sub>                                             | 82101.824          | 5.24(54)                           | 0.41(20)                            | 0.009               | 0.004(1)                                   | 5     |
| <i>c</i> -C <sub>3</sub> H <sub>2</sub> O | 6 <sub>0,6</sub> -5 <sub>0,5</sub>                                             | 82283.171          | 5.28(3)                            | 0.39(6)                             | 0.016               | 0.006(1)                                   |       |
| <i>c</i> -HC <sup>13</sup> CCH            | 2 <sub>1,2</sub> -1 <sub>0,1</sub>                                             | 82303.747          | 5.25(3)                            | 0.45(3)                             | 0.060               | 0.029(2)                                   |       |
| <i>l</i> -C <sub>3</sub> H <sub>2</sub>   | 4 <sub>1,4</sub> -3 <sub>1,3</sub>                                             | 82395.089          | 5.28(3)                            | 0.45(3)                             | 0.187               | 0.089(8)                                   |       |
| HCCCHO                                    | 9 <sub>1,9</sub> -8 <sub>1,8</sub>                                             | 82424.912          | 5.28(3)                            | 0.56(9)                             | 0.011               | 0.007(1)                                   |       |
| CH <sub>3</sub> O                         | <sup>2</sup> E <sub>3/2</sub> $N=1-0$ $K=0$ $J=3/2-1/2$ $F=1-0$ $\Lambda = -1$ | 82455.980          | 5.20(4)                            | 0.57(12)                            | 0.010               | 0.006(1)                                   |       |
| CH <sub>3</sub> O                         | <sup>2</sup> E <sub>3/2</sub> $N=1-0$ $K=0$ $J=3/2-1/2$ $F=2-1$ $\Lambda = -1$ | 82458.252          | 5.45(3)                            | 0.66(9)                             | 0.015               | 0.011(1)                                   |       |
| CH <sub>3</sub> O                         | <sup>2</sup> E <sub>3/2</sub> $N=1-0$ $K=0$ $J=3/2-1/2$ $F=2-1$ $\Lambda = +1$ | 82471.825          | 5.37(3)                            | 0.56(7)                             | 0.017               | 0.010(1)                                   |       |
| CH <sub>3</sub> O                         | <sup>2</sup> E <sub>3/2</sub> $N=1-0$ $K=0$ $J=3/2-1/2$ $F=1-0$ $\Lambda = +1$ | 82524.180          | 5.33(3)                            | 0.74(21)                            | 0.007               | 0.006(1)                                   | 5     |
| HC <sub>3</sub> N                         | 31-30                                                                          | 82539.039          | 5.31(3)                            | 0.82(4)                             | 0.048               | 0.042(4)                                   |       |
| CH <sub>3</sub> C <sub>3</sub> N          | 20 <sub>0</sub> -19 <sub>0</sub>                                               | 82626.518          | 5.15(5)                            | 0.58(13)                            | 0.008               | 0.005(1)                                   |       |
| CH <sub>3</sub> OCH <sub>3</sub>          | 3 <sub>1,3</sub> -2 <sub>0,2</sub> $EA + AE$                                   | 82649.437          | 5.31(4)                            | 0.39(12)                            | 0.009               | 0.004(1)                                   |       |
| CH <sub>3</sub> OCH <sub>3</sub>          | 3 <sub>1,3</sub> -2 <sub>0,2</sub> $EE$                                        | 82650.325          | 5.24(3)                            | 0.55(6)                             | 0.020               | 0.012(1)                                   |       |
| CH <sub>3</sub> OCH <sub>3</sub>          | 3 <sub>1,3</sub> -2 <sub>0,2</sub> $AA$                                        | 82651.210          | 5.28(4)                            | 0.74(14)                            | 0.008               | 0.006(1)                                   |       |
| CNCN                                      | 8-7                                                                            | 82784.692          | 5.23(3)                            | 0.83(12)                            | 0.010               | 0.009(1)                                   |       |
| CH <sub>3</sub> C <sup>13</sup> CH        | 5 <sub>1</sub> -4 <sub>1</sub>                                                 | 82899.544          | 5.33(3)                            | 0.42(6)                             | 0.018               | 0.008(1)                                   |       |
| CH <sub>3</sub> C <sup>13</sup> CH        | 5 <sub>0</sub> -4 <sub>0</sub>                                                 | 82901.099          | 5.30(3)                            | 0.56(8)                             | 0.017               | 0.010(1)                                   |       |
| <i>c</i> -C <sub>3</sub> H <sub>2</sub>   | 3 <sub>1,2</sub> -3 <sub>0,3</sub>                                             | 82966.200          | 5.28(3)                            | 0.52(3)                             | 0.756               | 0.419(41)                                  |       |
| D <sub>2</sub> CS                         | 3 <sub>1,3</sub> -2 <sub>1,3</sub>                                             | 83077.759          | 5.36(3)                            | 0.36(4)                             | 0.016               | 0.006(1)                                   |       |
| <sup>13</sup> CH <sub>3</sub> CCH         | 5 <sub>1</sub> -4 <sub>1</sub>                                                 | 83129.527          | 5.25(21)                           | 0.42(6)                             | 0.020               | 0.009(1)                                   |       |
| <sup>13</sup> CH <sub>3</sub> CCH         | 5 <sub>0</sub> -4 <sub>0</sub>                                                 | 83131.079          | 5.28(16)                           | 0.53(6)                             | 0.020               | 0.011(1)                                   |       |
| <i>l</i> -C <sub>3</sub> H <sub>2</sub>   | 4 <sub>0,4</sub> -3 <sub>0,3</sub>                                             | 83165.345          | 5.31(3)                            | 0.41(3)                             | 0.127               | 0.056(5)                                   |       |
| HNC <sup>18</sup> O                       | 4 <sub>0,4</sub> -3 <sub>0,3</sub>                                             | 83191.568          | 5.32(3)                            | 0.53(17)                            | 0.007               | 0.004(1)                                   | 5     |
| C <sub>2</sub> H <sub>3</sub> CN          | 9 <sub>1,9</sub> -8 <sub>1,8</sub>                                             | 83207.507          | 5.36(4)                            | 0.96(30)                            | 0.006               | 0.006(1)                                   | 5     |
| CHD <sub>2</sub> OH                       | 2 <sub>0</sub> -1 <sub>0</sub> $e_0$                                           | 83289.630          | 5.33(3)                            | 0.30(6)                             | 0.016               | 0.005(1)                                   |       |
| <i>c</i> -HCC <sup>13</sup> CH            | 3 <sub>2,2</sub> -3 <sub>1,3</sub>                                             | 83474.137          | 5.29(3)                            | 0.55(3)                             | 0.019               | 0.011(1)                                   |       |
| C <sub>5</sub> H                          | <sup>2</sup> Π <sub>3/2</sub> $J=35/2-33/2$ $a$                                | 83541.407          | 5.25(4)                            | 0.91(17)                            | 0.005               | 0.005(1)                                   |       |
| C <sub>5</sub> H                          | <sup>2</sup> Π <sub>3/2</sub> $J=35/2-33/2$ $b$                                | 83546.917          | 5.39(5)                            | 0.53(10)                            | 0.004               | 0.0024(2)                                  |       |
| CH <sub>3</sub> CHO                       | 2 <sub>1,2</sub> -1 <sub>0,1</sub> $E$                                         | 83584.279          | 5.29(3)                            | 0.61(5)                             | 0.014               | 0.009(1)                                   |       |
| <i>c</i> -HCC <sup>13</sup> CH            | 2 <sub>0,2</sub> -1 <sub>0,1</sub>                                             | 83616.261          | 5.25(3)                            | 0.49(9)                             | 0.007               | 0.0035(3)                                  |       |
| SO <sub>2</sub>                           | 8 <sub>1,7</sub> -8 <sub>0,8</sub>                                             | 83688.093          | 5.28(3)                            | 0.47(6)                             | 0.014               | 0.007(1)                                   |       |
| H <sup>13</sup> C <sup>15</sup> N         | 1-0                                                                            | 83727.577          | 5.36(3)                            | 0.67(10)                            | 0.006               | 0.0043(4)                                  |       |
| HCCCHO                                    | 9 <sub>0,9</sub> -8 <sub>0,8</sub>                                             | 83775.819          | 5.22(3)                            | 0.42(3)                             | 0.019               | 0.0085(8)                                  |       |
| HOCN                                      | 4 <sub>0,4</sub> -3 <sub>0,3</sub>                                             | 83900.570          | 5.32(3)                            | 0.51(3)                             | 0.093               | 0.050(5)                                   |       |
| <i>l</i> -C <sub>3</sub> H <sub>2</sub>   | 4 <sub>1,3</sub> -3 <sub>1,2</sub>                                             | 83933.699          | 5.31(3)                            | 0.44(3)                             | 0.172               | 0.082(8)                                   |       |
| HC <sup>34</sup> S <sup>+</sup>           | 2-1                                                                            | 83965.626          | 5.30(3)                            | 0.50(3)                             | 0.014               | 0.0072(7)                                  |       |
| HNC <sub>3</sub>                          | 9-8                                                                            | 84028.240          | 5.29(3)                            | 0.43(3)                             | 0.026               | 0.012(1)                                   |       |
| <sup>13</sup> CCH                         | $N=1-0$ $J=3/2-1/2$ $F_1=2-1$ $F=5/2-3/2$                                      | 84119.329          | 5.34(3)                            | 0.46(3)                             | 0.036               | 0.018(1)                                   |       |
| <sup>13</sup> CCH                         | $N=1-0$ $J=3/2-1/2$ $F_1=2-1$ $F=3/2-1/2$                                      | 84124.143          | 5.33(3)                            | 0.45(3)                             | 0.021               | 0.010(1)                                   |       |
| DC <sup>13</sup> CCN                      | 10-9                                                                           | 84149.304          | 5.26(13)                           | 0.49(17)                            | 0.006               | 0.0032(3)                                  |       |
| <sup>13</sup> CCH                         | $N=1-0$ $J=3/2-1/2$ $F_1=1-0$ $F=1/2-1/2$                                      | 84151.352          | 5.25(13)                           | 0.77(17)                            | 0.008               | 0.0070(6)                                  |       |
| <sup>13</sup> CCH                         | $N=1-0$ $J=3/2-1/2$ $F_1=1-0$ $F=3/2-1/2$                                      | 84153.305          | 5.33(13)                           | 0.48(17)                            | 0.025               | 0.013(1)                                   |       |
| C <sub>2</sub> <sup>34</sup> S            | 7 <sub>6</sub> -6 <sub>5</sub>                                                 | 84180.562          | 5.30(3)                            | 0.31(5)                             | 0.007               | 0.0024(2)                                  |       |
| <sup>13</sup> CCH                         | $N=1-0$ $J=1/2-1/2$ $F_1=0-1$ $F=1/2-1/2$                                      | 84183.977          | 5.30(3)                            | 0.56(27)                            | 0.008               | 0.005(1)                                   |       |
| <i>c</i> -HCC <sup>13</sup> CH            | 2 <sub>1,2</sub> -1 <sub>0,1</sub>                                             | 84185.635          | 5.27(3)                            | 0.41(3)                             | 0.327               | 0.142(14)                                  |       |
| <sup>13</sup> CCH                         | $N=1-0$ $J=1/2-1/2$ $F_1=1-1$ $F=1/2-3/2$                                      | 84192.487          | 5.29(24)                           | 0.40(20)                            | 0.009               | 0.004(1)                                   |       |
| <sup>13</sup> CCH                         | $N=1-0$ $J=1/2-1/2$ $F_1=1-1$ $F=3/2-3/2$                                      | 84206.865          | 5.30(3)                            | 0.46(4)                             | 0.021               | 0.010(1)                                   |       |
| CH <sub>3</sub> CHO                       | 2 <sub>1,2</sub> -1 <sub>0,1</sub> $A$                                         | 84219.749          | 5.22(3)                            | 0.77(9)                             | 0.013               | 0.011(1)                                   |       |
| <sup>13</sup> CCH                         | $N=1-0$ $J=1/2-1/2$ $F_1=1-1$ $F=1/2-1/2$                                      | 84225.376          | 5.06(3)                            | 0.42(9)                             | 0.006               | 0.0026(2)                                  | 5     |
| <i>c</i> -C <sub>3</sub> H <sub>2</sub> O | 6 <sub>2,5</sub> -5 <sub>2,4</sub>                                             | 84310.158          | 5.28(3)                            | 0.36(6)                             | 0.009               | 0.0034(3)                                  |       |
| <sup>34</sup> SO                          | 2 <sub>2</sub> -1 <sub>1</sub>                                                 | 84410.690          | 5.29(3)                            | 0.42(4)                             | 0.016               | 0.0073(7)                                  |       |
| DC <sub>3</sub> N                         | 10-9                                                                           | 84429.814          | 5.31(3)                            | 0.38(3)                             | 0.259               | 0.105(10)                                  |       |
| HCOOCH <sub>3</sub>                       | 7 <sub>2,6</sub> -6 <sub>2,5</sub> $E$                                         | 84449.169          | 5.29(3)                            | 0.29(4)                             | 0.009               | 0.0026(2)                                  |       |

Table A.1. continued.

| Molecule                          | Transition                                           | Frequency<br>(MHz) | $V_{LSR}$<br>(km s <sup>-1</sup> ) | $\Delta v$<br>(km s <sup>-1</sup> ) | $T_A^*$ peak<br>(K) | $\int T_A^* dv$<br>(K km s <sup>-1</sup> ) | Notes |
|-----------------------------------|------------------------------------------------------|--------------------|------------------------------------|-------------------------------------|---------------------|--------------------------------------------|-------|
| HCOOCH <sub>3</sub>               | 7 <sub>2,6</sub> -6 <sub>2,5</sub> A                 | 84454.754          | 5.35(22)                           | 0.65(13)                            | 0.008               | 0.005(1)                                   |       |
| CH <sub>3</sub> OH                | 5 <sub>-1</sub> -4 <sub>0</sub> E                    | 84521.172          |                                    |                                     | 0.102               | 0.112(11)                                  | 1     |
| c-C <sub>3</sub> H <sub>2</sub>   | 3 <sub>2,2</sub> -3 <sub>1,3</sub>                   | 84727.688          | 5.28(3)                            | 0.46(3)                             | 0.307               | 0.151(15)                                  |       |
| C <sub>2</sub> H <sub>3</sub> CN  | 9 <sub>0,9</sub> -8 <sub>0,8</sub>                   | 84946.000          | 5.29(3)                            | 0.56(4)                             | 0.013               | 0.0078(7)                                  |       |
| c-C <sub>3</sub> H <sub>2</sub> O | 6 <sub>3,4</sub> -5 <sub>3,3</sub>                   | 84966.940          | 5.30(3)                            | 0.57(12)                            | 0.008               | 0.005(1)                                   |       |
| c-C <sub>3</sub> H <sub>2</sub> O | 6 <sub>3,3</sub> -5 <sub>3,2</sub>                   | 85081.876          | 5.30(3)                            | 0.39(4)                             | 0.009               | 0.0037(3)                                  |       |
| OCS                               | 7-6                                                  | 85139.103          | 5.32(3)                            | 0.58(3)                             | 0.120               | 0.074(7)                                   |       |
| D <sub>2</sub> CS                 | 3 <sub>0,3</sub> -2 <sub>0,2</sub>                   | 85153.920          | 5.33(3)                            | 0.39(12)                            | 0.083               | 0.034(9)                                   |       |
| HC <sup>18</sup> O <sup>+</sup>   | 1-0                                                  | 85162.223          | 5.28(3)                            | 0.49(3)                             | 0.480               | 0.249(24)                                  |       |
| HC <sub>3</sub> N                 | 32-31                                                | 85201.340          | 5.31(3)                            | 0.86(3)                             | 0.047               | 0.043(4)                                   |       |
| C <sup>13</sup> CH                | $N=1-0 J=3/2-1/2 F_1=2-1 F=5/2-3/2$                  | 85229.335          | 5.36(3)                            | 0.51(3)                             | 0.077               | 0.041(4)                                   |       |
| C <sup>13</sup> CH                | $N=1-0 J=3/2-1/2 F_1=2-1 F=3/2-1/2$                  | 85232.805          | 5.38(3)                            | 0.54(5)                             | 0.047               | 0.027(2)                                   |       |
| C <sup>13</sup> CH                | $N=1-0 J=3/2-1/2 F_1=1-0 F=1/2-1/2$                  | 85247.728          | 5.34(3)                            | 0.45(4)                             | 0.028               | 0.013(1)                                   |       |
| C <sup>13</sup> CH                | $N=1-0 J=3/2-1/2 F_1=1-0 F=3/2-1/2$                  | 85256.988          | 5.35(3)                            | 0.49(3)                             | 0.049               | 0.026(2)                                   |       |
| H <sup>15</sup> N <sup>13</sup> C | 1-0                                                  | 85258.923          | 5.44(3)                            | 0.56(10)                            | 0.018               | 0.011(1)                                   |       |
| CH <sub>2</sub> DOH               | 1 <sub>1,0</sub> -1 <sub>0,1</sub> e <sub>0</sub>    | 85296.727          | 5.10(3)                            | 0.50(6)                             | 0.026               | 0.014(1)                                   | 2     |
| C <sup>13</sup> CH                | $N=1-0 J=1/2-1/2 F_1=1-1 F=1/2-3/2$                  | 85303.990          |                                    |                                     |                     |                                            | 2     |
| C <sup>13</sup> CH                | $N=1-0 J=1/2-1/2 F_1=1-1 F=3/2-3/2$                  | 85307.459          | 5.35(10)                           | 0.56(4)                             | 0.044               | 0.026(2)                                   |       |
| C <sup>13</sup> CH                | $N=1-0 J=1/2-1/2 F_1=0-1 F=1/2-1/2$                  | 85314.092          | 5.34(23)                           | 0.66(8)                             | 0.024               | 0.017(2)                                   |       |
| c-C <sub>3</sub> H <sub>2</sub>   | 2 <sub>1,2</sub> -1 <sub>0,1</sub>                   | 85338.894          |                                    |                                     | 2.407               | 2.267(226)                                 | 1     |
| HCS <sup>+</sup>                  | 2-1                                                  | 85347.890          | 5.36(3)                            | 0.53(26)                            | 0.276               | 0.156(77)                                  |       |
| HCCCHO                            | 9 <sub>1,8</sub> -8 <sub>1,7</sub>                   | 85361.195          | 5.25(52)                           | 0.45(6)                             | 0.010               | 0.005(1)                                   |       |
| CH <sub>3</sub> <sup>13</sup> CCH | 5 <sub>1</sub> -4 <sub>1</sub>                       | 85420.230          | 5.30(3)                            | 0.48(7)                             | 0.018               | 0.009(1)                                   |       |
| CH <sub>3</sub> <sup>13</sup> CCH | 5 <sub>0</sub> -4 <sub>0</sub>                       | 85421.857          | 5.31(3)                            | 0.48(5)                             | 0.019               | 0.010(1)                                   |       |
| CH <sub>3</sub> CCH               | 5 <sub>3</sub> -4 <sub>3</sub>                       | 85442.601          | 5.37(13)                           | 0.85(42)                            | 0.011               | 0.010(4)                                   |       |
| CH <sub>3</sub> CCH               | 5 <sub>2</sub> -4 <sub>2</sub>                       | 85450.766          | 5.30(13)                           | 0.65(17)                            | 0.096               | 0.066(26)                                  |       |
| CH <sub>3</sub> CCH               | 5 <sub>1</sub> -4 <sub>1</sub>                       | 85455.667          | 5.30(13)                           | 0.49(17)                            | 0.885               | 0.459(45)                                  |       |
| CH <sub>3</sub> CCH               | 5 <sub>0</sub> -4 <sub>0</sub>                       | 85457.300          | 5.29(13)                           | 0.48(17)                            | 1.001               | 0.508(50)                                  |       |
| CH <sub>3</sub> C <sub>4</sub> H  | 21 <sub>1</sub> -20 <sub>1</sub>                     | 85497.334          | 5.39(4)                            | 0.47(11)                            | 0.007               | 0.003(1)                                   |       |
| CH <sub>3</sub> C <sub>4</sub> H  | 21 <sub>0</sub> -20 <sub>0</sub>                     | 85498.167          | 5.25(3)                            | 0.45(11)                            | 0.009               | 0.005(1)                                   |       |
| HCO <sub>2</sub> <sup>+</sup>     | 4 <sub>0,4</sub> -3 <sub>0,3</sub>                   | 85531.497          | 5.28(3)                            | 0.42(3)                             | 0.119               | 0.054(5)                                   |       |
| C <sub>4</sub> H                  | $N=9-8 J=19/2-17/2$                                  | 85634.010          | 5.33(3)                            | 0.49(3)                             | 0.518               | 0.272(27)                                  |       |
| c-C <sub>3</sub> HD               | 4 <sub>3,2</sub> -4 <sub>2,3</sub>                   | 85643.318          | 5.37(52)                           | 0.63(31)                            | 0.008               | 0.005(2)                                   |       |
| c-C <sub>3</sub> H <sub>2</sub>   | 4 <sub>3,2</sub> -4 <sub>2,3</sub>                   | 85656.431          | 5.30(3)                            | 0.69(3)                             | 0.089               | 0.066(6)                                   |       |
| C <sub>4</sub> H                  | $N=9-8 J=17/2-15/2$                                  | 85672.580          | 5.30(3)                            | 0.50(3)                             | 0.470               | 0.249(24)                                  |       |
| C <sub>2</sub> H <sub>3</sub> CN  | 9 <sub>2,7</sub> -8 <sub>2,6</sub>                   | 85715.426          | 5.38(4)                            | 0.48(13)                            | 0.007               | 0.004(1)                                   | 5     |
| NH <sub>2</sub> D                 | 1 <sub>1,1</sub> -1 <sub>0,1</sub> ortho $F=0-1$     | 85924.789          | 5.42(13)                           | 0.49(17)                            | 0.706               | 0.367(54)                                  |       |
| NH <sub>2</sub> D                 | 1 <sub>1,1</sub> -1 <sub>0,1</sub> ortho $F=2-1$     | 85925.703          | 5.35(13)                           | 0.54(17)                            | 0.857               | 0.490(54)                                  |       |
| NH <sub>2</sub> D                 | 1 <sub>1,1</sub> -1 <sub>0,1</sub> ortho $F=2-2$     | 85926.278          | 5.38(13)                           | 0.66(17)                            | 1.486               | 1.038(103)                                 | 3     |
| NH <sub>2</sub> D                 | 1 <sub>1,1</sub> -1 <sub>0,1</sub> ortho $F=1-1$     | 85926.278          |                                    |                                     |                     |                                            | 3     |
| NH <sub>2</sub> D                 | 1 <sub>1,1</sub> -1 <sub>0,1</sub> ortho $F=1-2$     | 85926.885          | 5.41(13)                           | 0.50(17)                            | 0.786               | 0.415(54)                                  |       |
| NH <sub>2</sub> D                 | 1 <sub>1,1</sub> -1 <sub>0,1</sub> ortho $F=1-0$     | 85927.723          | 5.33(13)                           | 0.47(17)                            | 0.724               | 0.366(54)                                  |       |
| HC <sup>15</sup> N                | 1-0                                                  | 86054.966          | 5.31(3)                            | 0.56(3)                             | 0.255               | 0.152(15)                                  |       |
| SO                                | 2 <sub>2</sub> -1 <sub>1</sub>                       | 86093.950          |                                    |                                     | 0.444               | 0.254(25)                                  | 1     |
| C <sub>2</sub> S                  | 7 <sub>6</sub> -6 <sub>5</sub>                       | 86181.391          | 5.25(3)                            | 0.49(3)                             | 0.191               | 0.100(10)                                  |       |
| H <sup>13</sup> CN                | 1-0 $F=1-1$                                          | 86338.735          |                                    |                                     | 0.452               | 0.317(31)                                  | 1     |
| H <sup>13</sup> CN                | 1-0 $F=2-1$                                          | 86340.167          |                                    |                                     | 0.589               | 0.487(48)                                  | 1     |
| H <sup>13</sup> CN                | 1-0 $F=0-1$                                          | 86342.254          |                                    |                                     | 0.246               | 0.160(16)                                  | 1     |
| CH <sub>2</sub> DCN               | 5 <sub>1,5</sub> -4 <sub>1,4</sub>                   | 86458.272          | 5.33(3)                            | 0.60(9)                             | 0.011               | 0.007(1)                                   |       |
| trans-HCOOH                       | 4 <sub>1,4</sub> -3 <sub>1,3</sub>                   | 86546.189          | 5.31(3)                            | 0.46(3)                             | 0.024               | 0.012(1)                                   |       |
| HC <sub>3</sub> NH <sup>+</sup>   | 10-9                                                 | 86578.136          | 5.12(3)                            | 0.45(10)                            | 0.008               | 0.004(1)                                   | 5     |
| C <sub>3</sub> O                  | 9-8                                                  | 86593.678          | 5.28(3)                            | 0.41(3)                             | 0.096               | 0.042(4)                                   |       |
| HCCO                              | $N=4-3 J=9/2-7/2 F=5-4$                              | 86642.357          | 5.35(4)                            | 0.45(8)                             | 0.011               | 0.005(1)                                   |       |
| HCCO                              | $N=4-3 J=9/2-7/2 F=4-3$                              | 86643.862          | 5.34(3)                            | 0.41(8)                             | 0.012               | 0.005(1)                                   |       |
| HCCO                              | $N=4-3 J=7/2-5/2 F=4-3$                              | 86655.825          | 5.37(5)                            | 0.64(14)                            | 0.008               | 0.005(1)                                   |       |
| HCCO                              | $N=4-3 J=7/2-5/2 F=3-2$                              | 86657.477          | 5.28(3)                            | 0.44(12)                            | 0.009               | 0.004(1)                                   |       |
| CH <sub>2</sub> DOH               | 2 <sub>1,1</sub> -2 <sub>0,2</sub> e <sub>0</sub>    | 86668.751          | 5.07(3)                            | 0.53(3)                             | 0.036               | 0.020(2)                                   |       |
| HCO                               | 1 <sub>0,1</sub> -0 <sub>0,0</sub> $J=3/2-1/2 F=2-1$ | 86670.760          | 5.43(3)                            | 0.53(3)                             | 0.148               | 0.083(8)                                   |       |
| HCO                               | 1 <sub>0,1</sub> -0 <sub>0,0</sub> $J=3/2-1/2 F=1-0$ | 86708.360          | 5.41(3)                            | 0.71(3)                             | 0.118               | 0.089(8)                                   | 3     |
| C <sub>3</sub> S                  | 15-14                                                | 86708.379          |                                    |                                     |                     |                                            | 3     |
| H <sup>13</sup> CO <sup>+</sup>   | 1-0                                                  | 86754.288          |                                    |                                     | 2.100               | 1.595(159)                                 | 1     |
| CH <sub>3</sub> C <sub>3</sub> N  | 21 <sub>1</sub> -20 <sub>1</sub>                     | 86756.698          | 5.29(51)                           | 0.44(21)                            | 0.005               | 0.002(1)                                   | 5     |
| CH <sub>3</sub> C <sub>3</sub> N  | 21 <sub>0</sub> -20 <sub>0</sub>                     | 86757.524          | 5.23(51)                           | 0.73(36)                            | 0.007               | 0.006(2)                                   |       |
| HCO                               | 1 <sub>0,1</sub> -0 <sub>0,0</sub> $J=1/2-1/2 F=1-1$ | 86777.460          | 5.43(3)                            | 0.50(3)                             | 0.092               | 0.049(4)                                   |       |
| HCO                               | 1 <sub>0,1</sub> -0 <sub>0,0</sub> $J=1/2-1/2 F=0-1$ | 86805.780          | 5.47(3)                            | 0.48(3)                             | 0.034               | 0.018(1)                                   |       |
| CH <sub>2</sub> DCN               | 5 <sub>0,5</sub> -4 <sub>0,4</sub>                   | 86833.937          | 5.28(3)                            | 0.51(8)                             | 0.017               | 0.009(2)                                   |       |

Table A.1. continued.

| Molecule                         | Transition                                                   | Frequency<br>(MHz) | $V_{LSR}$<br>(km s <sup>-1</sup> ) | $\Delta v$<br>(km s <sup>-1</sup> ) | $T_A^*$ peak<br>(K) | $\int T_A^* dv$<br>(K km s <sup>-1</sup> ) | Notes |
|----------------------------------|--------------------------------------------------------------|--------------------|------------------------------------|-------------------------------------|---------------------|--------------------------------------------|-------|
| SiO                              | 2-1                                                          | 86846.985          |                                    |                                     | 0.031               | 0.086( 8)                                  | 1     |
| HC <sup>17</sup> O <sup>+</sup>  | 1-0 $F=5/2-3/2$                                              | 87056.966          | 5.32( 3)                           | 0.51( 3)                            | 0.037               | 0.020( 1)                                  | 4     |
| HC <sup>17</sup> O <sup>+</sup>  | 1-0 $F=7/2-5/2$                                              | 87057.258          | 5.37( 3)                           | 0.45( 3)                            | 0.076               | 0.037( 3)                                  | 4     |
| HC <sup>17</sup> O <sup>+</sup>  | 1-0 $F=5/2-5/2$                                              | 87058.294          | 5.35( 3)                           | 0.45( 3)                            | 0.058               | 0.028( 2)                                  |       |
| HN <sup>13</sup> C               | 1-0                                                          | 87090.825          | 5.38( 3)                           | 0.84( 3)                            | 1.587               | 1.428(142)                                 |       |
| CH <sub>2</sub> DCN              | 5 <sub>1,4</sub> -4 <sub>1,3</sub>                           | 87211.469          | 5.39( 6)                           | 0.38( 8)                            | 0.007               | 0.0028( 2)                                 |       |
| C <sub>2</sub> H                 | $N=1-0 J=3/2-1/2 F=1-1$                                      | 87284.105          |                                    |                                     | 0.842               | 0.536( 53)                                 | 1     |
| D <sub>2</sub> CS                | 3 <sub>1,2</sub> -2 <sub>1,1</sub>                           | 87302.662          | 5.36( 3)                           | 0.37( 4)                            | 0.017               | 0.007( 1)                                  |       |
| C <sub>2</sub> H <sub>3</sub> CN | 9 <sub>1,8</sub> -8 <sub>1,7</sub>                           | 87312.812          | 5.23(51)                           | 0.48(24)                            | 0.010               | 0.005( 2)                                  |       |
| C <sub>2</sub> H                 | $N=1-0 J=3/2-1/2 F=2-1$                                      | 87316.898          |                                    |                                     | 1.540               | 1.662(166)                                 | 1     |
| C <sub>2</sub> H                 | $N=1-0 J=3/2-1/2 F=1-0$                                      | 87328.585          |                                    |                                     | 1.202               | 1.141(114)                                 | 1     |
| C <sub>2</sub> H                 | $N=1-0 J=1/2-1/2 F=1-1$                                      | 87401.989          |                                    |                                     | 1.244               | 1.169(116)                                 | 1     |
| C <sub>2</sub> H                 | $N=1-0 J=1/2-1/2 F=0-1$                                      | 87407.165          |                                    |                                     | 1.018               | 0.749( 74)                                 | 1     |
| C <sub>2</sub> H                 | $N=1-0 J=1/2-1/2 F=1-0$                                      | 87446.470          |                                    |                                     | 0.802               | 0.533( 53)                                 | 1     |
| <i>cis</i> -HCOOH                | 4 <sub>0,4</sub> -3 <sub>0,3</sub>                           | 87694.694          | 5.32( 3)                           | 0.43( 7)                            | 0.009               | 0.0040( 4)                                 |       |
| HC <sub>3</sub> N                | 33-32                                                        | 87863.630          | 5.35( 3)                           | 0.86( 3)                            | 0.039               | 0.035( 3)                                  |       |
| HNCO                             | 4 <sub>0,4</sub> -3 <sub>0,3</sub> $F=3-3$                   | 87924.351          | 5.32(26)                           | 0.36(18)                            | 0.053               | 0.020( 10)                                 |       |
| HNCO                             | 4 <sub>0,4</sub> -3 <sub>0,3</sub> $F=5-4 + F=4-3 + F=3-2$   | 87925.252          | 5.35( 3)                           | 0.45( 3)                            | 1.623               | 0.783( 78)                                 |       |
| HNCO                             | 4 <sub>0,4</sub> -3 <sub>0,3</sub> $F=4-4$                   | 87925.915          | 5.32(35)                           | 0.38(19)                            | 0.057               | 0.023( 11)                                 |       |
| HN <sup>13</sup> CO              | 4 <sub>0,4</sub> -3 <sub>0,3</sub>                           | 87927.640          | 5.07(47)                           | 0.39(19)                            | 0.039               | 0.016( 8)                                  |       |
| CH <sub>2</sub> DOH              | 2 <sub>1,2</sub> -1 <sub>1,1</sub> $e_0$                     | 88073.074          | 5.21( 3)                           | 0.47( 5)                            | 0.020               | 0.010( 1)                                  |       |
| H <sup>13</sup> CCCN             | 10-9                                                         | 88166.832          | 5.42( 3)                           | 0.48( 3)                            | 0.073               | 0.037( 3)                                  |       |
| C <sub>4</sub> D                 | $N=10-9 J=21/2-19/2$                                         | 88308.034          | 5.41( 3)                           | 0.35( 6)                            | 0.009               | 0.004( 1)                                  |       |
| HC <sub>3</sub> <sup>15</sup> N  | 10-9                                                         | 88333.002          | 5.28( 3)                           | 0.49( 9)                            | 0.013               | 0.007( 1)                                  |       |
| C <sub>4</sub> D                 | $N=10-9 J=19/2-17/2$                                         | 88344.000          | 5.28( 3)                           | 0.42( 8)                            | 0.009               | 0.004( 1)                                  |       |
| HCN                              | 1-0 $F=1-1$                                                  | 88630.416          |                                    |                                     | 0.735               | 1.447(144)                                 | 1, 4  |
| HCN                              | 1-0 $F=2-1$                                                  | 88631.848          |                                    |                                     | 1.164               | 2.285(228)                                 | 1, 4  |
| HCN                              | 1-0 $F=0-1$                                                  | 88633.936          |                                    |                                     | 0.867               | 1.013(101)                                 | 1     |
| CH <sub>2</sub> DOH              | 3 <sub>1,2</sub> -3 <sub>0,3</sub> $e_0$                     | 88754.512          | 5.02(13)                           | 0.49(16)                            | 0.019               | 0.0100( 9)                                 |       |
| NCCNH <sup>+</sup>               | 10-9                                                         | 88758.108          | 5.34(13)                           | 0.30(15)                            | 0.018               | 0.0057( 5)                                 |       |
| HCOOCH <sub>3</sub>              | 7 <sub>1,6</sub> -6 <sub>1,5</sub> $E$                       | 88843.187          | 5.25(13)                           | 0.57(16)                            | 0.012               | 0.0076( 7)                                 |       |
| HCOOCH <sub>3</sub>              | 7 <sub>1,6</sub> -6 <sub>1,5</sub> $A$                       | 88851.607          | 5.26(13)                           | 0.40(16)                            | 0.013               | 0.0055( 5)                                 |       |
| H <sup>15</sup> NC               | 1-0                                                          | 88865.715          | 5.36( 3)                           | 0.45( 3)                            | 0.682               | 0.325( 32)                                 |       |
| H <sub>2</sub> C <sub>4</sub>    | 10 <sub>1,10</sub> -9 <sub>1,9</sub>                         | 88940.237          | 5.29( 3)                           | 0.56( 4)                            | 0.027               | 0.016( 1)                                  |       |
| C <sub>3</sub> N                 | $N=9-8 J=19/2-17/2$                                          | 89045.583          | 5.26( 3)                           | 0.46( 3)                            | 0.055               | 0.027( 2)                                  |       |
| C <sub>3</sub> N                 | $N=9-8 J=17/2-15/2$                                          | 89064.347          | 5.24( 3)                           | 0.46( 3)                            | 0.049               | 0.024( 2)                                  |       |
| HCO <sup>+</sup>                 | 1-0                                                          | 89188.525          |                                    |                                     | 2.338               | 4.440(444)                                 | 1     |
| H <sub>2</sub> C <sub>4</sub>    | 10 <sub>0,10</sub> -9 <sub>0,9</sub>                         | 89314.548          | 5.12( 3)                           | 0.52( 5)                            | 0.028               | 0.016( 1)                                  |       |
| HCOOCH <sub>3</sub>              | 8 <sub>1,8</sub> -7 <sub>1,7</sub> $A$                       | 89316.642          | 5.27( 3)                           | 0.64(19)                            | 0.010               | 0.007( 1)                                  |       |
| CH <sub>2</sub> DOH              | 2 <sub>0,2</sub> -1 <sub>0,1</sub> $e_0$                     | 89407.817          | 5.08( 4)                           | 0.43( 3)                            | 0.120               | 0.055( 5)                                  |       |
| HCCNC                            | 9-8                                                          | 89419.300          | 5.39( 3)                           | 0.43( 3)                            | 0.086               | 0.039( 3)                                  |       |
| <i>trans</i> -HCOOH              | 4 <sub>0,4</sub> -3 <sub>0,3</sub>                           | 89579.179          | 5.28( 3)                           | 0.55( 3)                            | 0.034               | 0.020( 1)                                  |       |
| H <sub>2</sub> C <sub>4</sub>    | 10 <sub>1,9</sub> -9 <sub>1,8</sub>                          | 89687.047          | 5.27( 3)                           | 0.53( 4)                            | 0.030               | 0.017( 1)                                  |       |
| C <sub>2</sub> H <sub>5</sub> OH | 4 <sub>1,4</sub> -3 <sub>0,3</sub>                           | 90117.601          | 5.26( 3)                           | 0.70( 7)                            | 0.009               | 0.007( 1)                                  |       |
| HCOOCH <sub>3</sub>              | 7 <sub>2,5</sub> -6 <sub>2,4</sub> $E$                       | 90145.723          | 5.26( 5)                           | 0.36( 5)                            | 0.010               | 0.0038( 3)                                 |       |
| HCOOCH <sub>3</sub>              | 7 <sub>2,5</sub> -6 <sub>2,4</sub> $A$                       | 90156.473          | 5.16( 5)                           | 0.79(12)                            | 0.005               | 0.004( 1)                                  |       |
| HCOOCH <sub>3</sub>              | 8 <sub>0,8</sub> -7 <sub>0,7</sub> $E$                       | 90227.659          | 5.28( 3)                           | 0.45( 4)                            | 0.012               | 0.0058( 5)                                 |       |
| HCOOCH <sub>3</sub>              | 8 <sub>0,8</sub> -7 <sub>0,7</sub> $A$                       | 90229.624          | 5.32( 3)                           | 0.39( 3)                            | 0.012               | 0.0049( 4)                                 |       |
| <sup>15</sup> NNH <sup>+</sup>   | 1-0 $F=1-1$                                                  | 90263.487          | 5.33( 3)                           | 0.43( 3)                            | 0.030               | 0.014( 1)                                  |       |
| <sup>15</sup> NNH <sup>+</sup>   | 1-0 $F=2-1$                                                  | 90263.912          | 5.31( 3)                           | 0.46( 3)                            | 0.053               | 0.026( 2)                                  |       |
| <sup>15</sup> NNH <sup>+</sup>   | 1-0 $F=0-1$                                                  | 90264.504          | 5.35( 3)                           | 0.38( 5)                            | 0.010               | 0.0040( 3)                                 |       |
| HCCCHO                           | 3 <sub>1,3</sub> -2 <sub>0,2</sub>                           | 90362.994          | 5.28( 5)                           | 0.49( 6)                            | 0.009               | 0.0046( 4)                                 |       |
| HC <sub>3</sub> N                | 34-33                                                        | 90525.890          | 5.38( 3)                           | 0.89( 4)                            | 0.029               | 0.028( 2)                                  |       |
| HC <sup>13</sup> CCN             | 10-9                                                         | 90593.057          | 5.34( 3)                           | 0.51( 3)                            | 0.069               | 0.037( 3)                                  |       |
| HCC <sup>13</sup> CN             | 10-9                                                         | 90601.777          | 5.27( 3)                           | 0.54( 3)                            | 0.076               | 0.044( 4)                                  |       |
| <i>cis</i> -HCOOH                | 4 <sub>1,3</sub> -3 <sub>1,2</sub>                           | 90661.097          | 5.28(49)                           | 0.42(20)                            | 0.005               | 0.002( 1)                                  |       |
| HNC                              | 1-0                                                          | 90663.568          |                                    |                                     | 2.049               | 3.189(318)                                 | 1     |
| C <sub>2</sub> S                 | 7 <sub>7</sub> -6 <sub>6</sub>                               | 90686.381          | 5.31( 3)                           | 0.57( 3)                            | 0.151               | 0.092( 9)                                  |       |
| CH <sub>3</sub> OD               | 2 <sub>0</sub> <sup>+</sup> -1 <sub>0</sub> <sup>+</sup> $A$ | 90705.810          | 5.45( 3)                           | 0.53( 4)                            | 0.015               | 0.0084( 8)                                 |       |
| CH <sub>2</sub> DOH              | 2 <sub>1,1</sub> -1 <sub>1,0</sub> $e_0$                     | 90779.841          | 5.06( 3)                           | 0.40( 3)                            | 0.026               | 0.011( 1)                                  |       |
| CH <sub>3</sub> C <sub>3</sub> N | 22 <sub>0</sub> -21 <sub>0</sub>                             | 90888.496          | 5.18( 5)                           | 0.75(25)                            | 0.006               | 0.005( 1)                                  | 5     |
| <sup>13</sup> C <sup>34</sup> S  | 2-1                                                          | 90926.026          | 5.30( 5)                           | 0.68( 6)                            | 0.011               | 0.008( 1)                                  |       |
| CH <sub>3</sub> OCH <sub>3</sub> | 6 <sub>0,6</sub> -5 <sub>1,5</sub> $AA$                      | 90937.508          | 5.27(13)                           | 0.61(16)                            | 0.008               | 0.0053( 5)                                 |       |
| CH <sub>3</sub> OCH <sub>3</sub> | 6 <sub>0,6</sub> -5 <sub>1,5</sub> $EE$                      | 90938.107          | 5.26(13)                           | 0.49(16)                            | 0.010               | 0.0051( 5)                                 |       |
| CH <sub>3</sub> OCH <sub>3</sub> | 6 <sub>0,6</sub> -5 <sub>1,5</sub> $EA + AE$                 | 90938.706          | 5.15(13)                           | 0.65(16)                            | 0.006               | 0.0044( 4)                                 | 5     |
| HC <sub>3</sub> N                | 10-9 $F=10-10$                                               | 90977.443          | 5.29(49)                           | 0.61(30)                            | 0.023               | 0.015( 7)                                  |       |

Table A.1. continued.

| Molecule                                  | Transition                                           | Frequency<br>(MHz) | $V_{LSR}$<br>(km s <sup>-1</sup> ) | $\Delta v$<br>(km s <sup>-1</sup> ) | $T_A^*$ peak<br>(K) | $\int T_A^* dv$<br>(K km s <sup>-1</sup> ) | Notes |
|-------------------------------------------|------------------------------------------------------|--------------------|------------------------------------|-------------------------------------|---------------------|--------------------------------------------|-------|
| HC <sub>3</sub> N                         | 10-9                                                 | 90979.023          |                                    |                                     | 2.594               | 1.978(197)                                 | 1     |
| HC <sub>3</sub> N                         | 10-9 $F=9-9$                                         | 90980.690          | 5.29(49)                           | 0.53(26)                            | 0.021               | 0.012( 6)                                  |       |
| HDCS                                      | 3 <sub>1,3</sub> -2 <sub>1,2</sub>                   | 91171.067          | 5.41( 3)                           | 0.41( 3)                            | 0.063               | 0.028( 2)                                  |       |
| N <sup>15</sup> NH <sup>+</sup>           | 1-0 $F=1-1$                                          | 91204.262          | 5.33( 3)                           | 0.46( 3)                            | 0.041               | 0.020( 2)                                  |       |
| N <sup>15</sup> NH <sup>+</sup>           | 1-0 $F=2-1$                                          | 91205.991          | 5.33( 3)                           | 0.48( 3)                            | 0.070               | 0.036( 3)                                  |       |
| N <sup>15</sup> NH <sup>+</sup>           | 1-0 $F=0-1$                                          | 91208.517          | 5.33( 3)                           | 0.48( 4)                            | 0.019               | 0.010( 1)                                  |       |
| <i>c</i> -C <sub>3</sub> H                | 2 <sub>1,2</sub> -1 <sub>1,1</sub> $J=5/2-1/2 F=2-1$ | 91431.915          | 5.34( 3)                           | 0.42( 5)                            | 0.011               | 0.0047( 4)                                 |       |
| <i>c</i> -C <sub>3</sub> H                | 2 <sub>1,2</sub> -1 <sub>1,1</sub> $J=5/2-3/2 F=3-2$ | 91494.349          | 5.36( 3)                           | 0.45( 3)                            | 0.417               | 0.200( 20)                                 |       |
| <i>c</i> -C <sub>3</sub> H                | 2 <sub>1,2</sub> -1 <sub>1,1</sub> $J=5/2-3/2 F=2-1$ | 91497.608          | 5.42( 3)                           | 0.45( 3)                            | 0.274               | 0.130( 13)                                 |       |
| <i>c</i> -C <sub>3</sub> H                | 2 <sub>1,2</sub> -1 <sub>1,1</sub> $J=5/2-3/2 F=2-2$ | 91512.969          | 5.40( 3)                           | 0.47( 3)                            | 0.038               | 0.019( 1)                                  |       |
| HCCCHO                                    | 10 <sub>1,10</sub> -9 <sub>1,9</sub>                 | 91572.516          | 5.24( 3)                           | 0.38( 8)                            | 0.007               | 0.0028( 2)                                 |       |
| CH <sub>2</sub> DOH                       | 4 <sub>1,3</sub> -4 <sub>0,4</sub> $e_0$             | 91586.845          | 4.97( 3)                           | 0.44( 8)                            | 0.008               | 0.004( 1)                                  |       |
| <i>c</i> -C <sub>3</sub> H                | 2 <sub>1,2</sub> -1 <sub>1,1</sub> $J=3/2-1/2 F=1-1$ | 91681.696          | 5.31( 3)                           | 0.47( 6)                            | 0.039               | 0.020( 2)                                  |       |
| <i>c</i> -C <sub>3</sub> H                | 2 <sub>1,2</sub> -1 <sub>1,1</sub> $J=3/2-1/2 F=1-0$ | 91692.752          | 5.31(13)                           | 0.46(15)                            | 0.101               | 0.049( 4)                                  |       |
| <i>c</i> -C <sub>3</sub> H                | 2 <sub>1,2</sub> -1 <sub>1,1</sub> $J=3/2-1/2 F=2-1$ | 91699.471          | 5.36( 3)                           | 0.47(15)                            | 0.261               | 0.132( 13)                                 |       |
| <i>c</i> -C <sub>3</sub> H                | 2 <sub>1,2</sub> -1 <sub>1,1</sub> $J=3/2-3/2 F=1-1$ | 91747.373          | 5.33( 3)                           | 0.47( 3)                            | 0.048               | 0.024( 2)                                  |       |
| HSCN                                      | 8 <sub>0,8</sub> -7 <sub>0,7</sub>                   | 91750.636          | 5.29( 3)                           | 0.49( 6)                            | 0.011               | 0.0056( 5)                                 |       |
| HCNO                                      | 4-3                                                  | 91751.320          | 5.33( 3)                           | 0.42( 3)                            | 0.044               | 0.019( 1)                                  |       |
| <i>c</i> -C <sub>3</sub> H                | 2 <sub>1,2</sub> -1 <sub>1,1</sub> $J=3/2-3/2 F=2-2$ | 91780.518          | 5.39( 3)                           | 0.45( 3)                            | 0.047               | 0.022( 2)                                  |       |
| C <sub>2</sub> <sup>34</sup> S            | 7 <sub>8</sub> -6 <sub>7</sub>                       | 91913.529          | 5.30( 3)                           | 0.58( 4)                            | 0.022               | 0.014( 1)                                  |       |
| CH <sub>3</sub> CN                        | 5 <sub>3</sub> -4 <sub>3</sub> $F=6-5$               | 91971.309          | 5.31( 3)                           | 0.30( 4)                            | 0.017               | 0.005( 1)                                  |       |
| CH <sub>3</sub> CN                        | 5 <sub>1</sub> -4 <sub>1</sub>                       | 91985.314          | 5.31( 3)                           | 0.79( 3)                            | 0.069               | 0.058( 5)                                  |       |
| CH <sub>3</sub> CN                        | 5 <sub>0</sub> -4 <sub>0</sub>                       | 91987.088          | 5.31( 3)                           | 0.66( 3)                            | 0.091               | 0.064( 6)                                  |       |
| C <sub>2</sub> O                          | 4 <sub>5</sub> -3 <sub>4</sub>                       | 92227.853          | 5.27( 3)                           | 0.58( 6)                            | 0.017               | 0.011( 1)                                  |       |
| C <sub>2</sub> O                          | 4 <sub>4</sub> -3 <sub>3</sub>                       | 92363.286          | 5.40( 3)                           | 0.46( 7)                            | 0.011               | 0.006( 1)                                  |       |
| <i>c</i> -C <sub>3</sub> D <sub>2</sub>   | 4 <sub>1,3</sub> -4 <sub>0,4</sub>                   | 92394.180          | 5.40( 3)                           | 0.65(10)                            | 0.011               | 0.008( 1)                                  |       |
| C <sub>2</sub> H <sub>3</sub> CN          | 10 <sub>1,10</sub> -9 <sub>1,9</sub>                 | 92426.250          | 5.24( 3)                           | 0.28( 8)                            | 0.010               | 0.003( 1)                                  |       |
| C <sub>3</sub> S                          | 16-15                                                | 92488.490          | 5.29( 3)                           | 0.41(17)                            | 0.051               | 0.023( 8)                                  |       |
| <sup>13</sup> CS                          | 2-1                                                  | 92494.308          |                                    |                                     | 0.269               | 0.244( 24)                                 | 1     |
| <i>c</i> -C <sub>3</sub> H <sub>2</sub> O | 7 <sub>1,7</sub> -6 <sub>1,6</sub>                   | 92517.433          | 5.29( 3)                           | 0.35( 3)                            | 0.032               | 0.012( 1)                                  |       |
| DC <sub>3</sub> N                         | 11-10                                                | 92872.375          | 5.29( 3)                           | 0.40( 3)                            | 0.194               | 0.082( 8)                                  |       |
| HDCS                                      | 3 <sub>0,3</sub> -2 <sub>0,2</sub>                   | 92981.601          | 5.33( 3)                           | 0.41( 3)                            | 0.205               | 0.089( 8)                                  |       |
| HCCCHO                                    | 10 <sub>0,10</sub> -9 <sub>0,9</sub>                 | 93043.287          | 5.15( 3)                           | 0.50( 5)                            | 0.019               | 0.010( 1)                                  |       |
| <i>trans</i> -HCOOH                       | 4 <sub>2,2</sub> -3 <sub>2,1</sub>                   | 93098.363          | 5.31( 3)                           | 0.36( 3)                            | 0.024               | 0.009( 1)                                  |       |
| CNCN                                      | 9-8                                                  | 93132.327          | 5.30(48)                           | 0.54( 9)                            | 0.011               | 0.006( 1)                                  |       |
| N <sub>2</sub> H <sup>+</sup>             | 1-0 $F_1=1-1 F=0-1$                                  | 93171.616          | 5.31( 3)                           | 0.50( 3)                            | 2.205               | 1.175(117)                                 | 4     |
| N <sub>2</sub> H <sup>+</sup>             | 1-0 $F_1=1-1 F=2-1 + F=2-2$                          | 93171.911          | 5.40( 3)                           | 0.52( 3)                            | 2.808               | 1.555(155)                                 | 4     |
| N <sub>2</sub> H <sup>+</sup>             | 1-0 $F_1=1-1 F=1-0 + F=1-1 + F=1-2$                  | 93172.048          | 5.31( 3)                           | 0.51( 3)                            | 2.462               | 1.340(133)                                 | 4     |
| N <sub>2</sub> H <sup>+</sup>             | 1-0 $F_1=2-1 F=2-1 + F=2-2$                          | 93173.473          | 5.36(13)                           | 0.61(15)                            | 3.176               | 2.050(220)                                 | 4     |
| N <sub>2</sub> H <sup>+</sup>             | 1-0 $F_1=2-1 F=3-2$                                  | 93173.770          | 5.39(13)                           | 0.58(15)                            | 3.586               | 2.196(220)                                 | 4     |
| N <sub>2</sub> H <sup>+</sup>             | 1-0 $F_1=2-1 F=1-0 + F=1-1 + F=1-2$                  | 93173.964          | 5.35(13)                           | 0.55(15)                            | 2.392               | 1.406(220)                                 | 4     |
| N <sub>2</sub> H <sup>+</sup>             | 1-0 $F_1=0-1$                                        | 93176.260          | 5.35(13)                           | 0.55(15)                            | 2.900               | 1.689(168)                                 |       |
| HC <sub>5</sub> N                         | 35-34                                                | 93188.123          | 5.35( 3)                           | 0.75( 4)                            | 0.028               | 0.022( 2)                                  |       |
| S <sup>18</sup> O                         | 2 <sub>3</sub> -1 <sub>2</sub>                       | 93267.270          | 4.95( 3)                           | 0.43( 3)                            | 0.076               | 0.035( 3)                                  |       |
| HNC <sub>3</sub>                          | 10-9                                                 | 93364.241          | 5.30( 3)                           | 0.56( 8)                            | 0.014               | 0.008( 1)                                  |       |
| C <sup>13</sup> CS                        | 7 <sub>8</sub> -6 <sub>7</sub> $F=9-8$               | 93446.679          | 5.09( 3)                           | 0.55(18)                            | 0.010               | 0.006( 2)                                  | 2     |
| C <sup>13</sup> CS                        | 7 <sub>8</sub> -6 <sub>7</sub> $F=8-7$               | 93447.430          | 5.57( 6)                           | 0.31(14)                            | 0.008               | 0.003( 1)                                  | 2     |
| CH <sub>3</sub> CCD                       | 6 <sub>1</sub> -5 <sub>1</sub>                       | 93454.331          | 5.27( 3)                           | 0.36( 3)                            | 0.064               | 0.025( 2)                                  |       |
| CH <sub>3</sub> CCD                       | 6 <sub>0</sub> -5 <sub>0</sub>                       | 93456.044          | 5.26( 3)                           | 0.36( 3)                            | 0.067               | 0.026( 2)                                  |       |
| CH <sub>3</sub> CHO                       | 5 <sub>1,5</sub> -4 <sub>1,4</sub> $A$               | 93580.909          | 5.30( 3)                           | 0.67( 3)                            | 0.036               | 0.026( 2)                                  |       |
| CH <sub>3</sub> CHO                       | 5 <sub>1,5</sub> -4 <sub>1,4</sub> $E$               | 93595.235          | 5.31( 3)                           | 0.56( 3)                            | 0.038               | 0.022( 2)                                  |       |
| HNCS                                      | 8 <sub>0,8</sub> -7 <sub>0,7</sub>                   | 93830.050          | 5.37( 4)                           | 0.88(13)                            | 0.008               | 0.007( 1)                                  |       |
| C <sub>2</sub> S                          | 7 <sub>8</sub> -6 <sub>7</sub>                       | 93870.107          | 5.31( 3)                           | 0.47( 3)                            | 0.567               | 0.284( 28)                                 |       |
| HDCCO                                     | 5 <sub>0,5</sub> -4 <sub>0,4</sub>                   | 94088.936          | 5.29( 3)                           | 0.42( 4)                            | 0.021               | 0.009( 1)                                  |       |
| C <sub>2</sub> H <sub>3</sub> CN          | 10 <sub>0,10</sub> -9 <sub>0,9</sub>                 | 94276.636          | 5.29( 3)                           | 0.36( 5)                            | 0.013               | 0.005( 1)                                  |       |
| <i>c</i> -C <sub>3</sub> D <sub>2</sub>   | 3 <sub>0,3</sub> -2 <sub>1,2</sub>                   | 94371.354          | 5.33( 3)                           | 0.35( 3)                            | 0.064               | 0.024( 2)                                  |       |
| <sup>13</sup> CH <sub>3</sub> OH          | 2 <sub>-1</sub> -1 <sub>-1</sub> $E$                 | 94405.163          | 5.13( 3)                           | 0.55( 3)                            | 0.028               | 0.017( 1)                                  |       |
| <sup>13</sup> CH <sub>3</sub> OH          | 2 <sub>0</sub> -1 <sub>0</sub> $A+$                  | 94407.129          | 5.31( 7)                           | 0.70( 3)                            | 0.035               | 0.026( 2)                                  |       |
| <sup>13</sup> CH <sub>2</sub> DCCH        | 6 <sub>0,6</sub> -5 <sub>0,5</sub>                   | 94729.009          | 5.19( 5)                           | 0.45(11)                            | 0.007               | 0.003( 1)                                  |       |
| HDCS                                      | 3 <sub>1,2</sub> -2 <sub>1,1</sub>                   | 94828.488          | 5.26( 3)                           | 0.38( 3)                            | 0.060               | 0.024( 2)                                  |       |
| C <sub>4</sub> H                          | $N=10-9 J=21/2-19/2$                                 | 95150.393          | 5.34( 3)                           | 0.44( 3)                            | 0.336               | 0.157( 15)                                 |       |
| C <sub>4</sub> H                          | $N=10-9 J=19/2-17/2$                                 | 95188.947          | 5.31( 3)                           | 0.47( 3)                            | 0.295               | 0.147( 14)                                 |       |
| HC <sub>3</sub> NH <sup>+</sup>           | 11-10                                                | 95235.533          | 5.24( 3)                           | 0.31( 6)                            | 0.007               | 0.0024( 2)                                 | 5     |
| <i>l</i> -C <sub>3</sub> HD               | 5 <sub>1,5</sub> -4 <sub>1,4</sub>                   | 95703.443          | 5.37( 3)                           | 0.33( 7)                            | 0.005               | 0.0017( 1)                                 | 5     |
| HC <sub>5</sub> N                         | 36-35                                                | 95850.335          | 5.33( 3)                           | 0.91( 3)                            | 0.019               | 0.018( 1)                                  |       |
| CH <sub>3</sub> OH                        | 2 <sub>1</sub> -1 <sub>1</sub> $A+$                  | 95914.310          | 5.39( 3)                           | 1.02( 3)                            | 0.024               | 0.026( 2)                                  |       |

Table A.1. continued.

| Molecule                                  | Transition                                               | Frequency<br>(MHz) | $V_{LSR}$<br>(km s <sup>-1</sup> ) | $\Delta v$<br>(km s <sup>-1</sup> ) | $T_A^*$ peak<br>(K) | $\int T_A^* dv$<br>(K km s <sup>-1</sup> ) | Notes |
|-------------------------------------------|----------------------------------------------------------|--------------------|------------------------------------|-------------------------------------|---------------------|--------------------------------------------|-------|
| CH <sub>3</sub> CHO                       | 5 <sub>0,5</sub> -4 <sub>0,4</sub> E                     | 95947.437          | 5.28(3)                            | 0.64(3)                             | 0.051               | 0.035(3)                                   |       |
| CH <sub>3</sub> CHO                       | 5 <sub>0,5</sub> -4 <sub>0,4</sub> A                     | 95963.459          | 5.32(3)                            | 0.61(3)                             | 0.052               | 0.034(3)                                   |       |
| <i>c</i> -C <sub>3</sub> HD               | 2 <sub>1,1</sub> -1 <sub>1,0</sub>                       | 95994.082          | 5.30(3)                            | 0.50(3)                             | 0.169               | 0.090(9)                                   |       |
| HCOOCH <sub>3</sub>                       | 8 <sub>2,7</sub> -7 <sub>2,6</sub> E                     | 96070.725          | 5.27(3)                            | 0.44(4)                             | 0.008               | 0.0040(4)                                  |       |
| HCOOCH <sub>3</sub>                       | 8 <sub>2,7</sub> -7 <sub>2,6</sub> A                     | 96076.845          | 5.28(5)                            | 0.47(5)                             | 0.008               | 0.0041(4)                                  |       |
| S <sup>17</sup> O                         | 2 <sub>3</sub> -1 <sub>2</sub> F=11/2-9/2                | 96085.277          | 5.34(3)                            | 0.50(10)                            | 0.005               | 0.0027(2)                                  |       |
| C <sub>3</sub> O                          | 10-9                                                     | 96214.619          | 5.31(3)                            | 0.42(3)                             | 0.059               | 0.027(2)                                   |       |
| CH <sub>3</sub> CHO                       | 5 <sub>2,4</sub> -4 <sub>2,3</sub> A                     | 96274.252          | 5.36(3)                            | 0.63(10)                            | 0.006               | 0.0043(4)                                  |       |
| C <sup>34</sup> S                         | 2-1                                                      | 96412.950          |                                    |                                     | 0.495               | 0.487(48)                                  | 1     |
| CH <sub>3</sub> CHO                       | 5 <sub>2,4</sub> -4 <sub>2,3</sub> E                     | 96425.614          | 5.26(3)                            | 1.07(11)                            | 0.009               | 0.010(1)                                   |       |
| CH <sub>3</sub> CHO                       | 5 <sub>2,3</sub> -4 <sub>2,2</sub> E                     | 96475.524          | 5.28(13)                           | 0.68(15)                            | 0.011               | 0.0077(7)                                  |       |
| CH <sub>3</sub> CHO                       | 5 <sub>2,3</sub> -4 <sub>2,2</sub> A                     | 96632.663          | 5.42(7)                            | 0.68(8)                             | 0.008               | 0.0057(5)                                  |       |
| CH <sub>2</sub> DCCH                      | 6 <sub>1,6</sub> -5 <sub>1,5</sub>                       | 96691.587          | 5.26(3)                            | 0.39(3)                             | 0.101               | 0.042(4)                                   |       |
| CH <sub>3</sub> OH                        | 2 <sub>-1</sub> -1 <sub>-1</sub> E                       | 96739.358          |                                    |                                     | 1.262               | 1.027(102)                                 | 1     |
| CH <sub>3</sub> OH                        | 2 <sub>0</sub> -1 <sub>0</sub> A+                        | 96741.371          |                                    |                                     | 1.696               | 1.384(138)                                 | 1     |
| <i>cis</i> -HCOOH                         | 1 <sub>1,1</sub> -0 <sub>0,0</sub>                       | 96743.447          | 5.43(13)                           | 0.54(15)                            | 0.004               | 0.002(1)                                   | 5     |
| CH <sub>3</sub> OH                        | 2 <sub>0</sub> -1 <sub>0</sub> E                         | 96744.545          |                                    |                                     | 0.218               | 0.187(18)                                  | 1     |
| CH <sub>3</sub> OH                        | 2 <sub>1</sub> -1 <sub>1</sub> E                         | 96755.501          | 5.34(3)                            | 0.83(3)                             | 0.039               | 0.034(3)                                   |       |
| <i>l</i> -C <sub>3</sub> HD               | 5 <sub>0,5</sub> -4 <sub>0,4</sub>                       | 96902.196          | 5.32(3)                            | 0.42(3)                             | 0.016               | 0.0070(7)                                  |       |
| C <sub>2</sub> H <sub>3</sub> CN          | 10 <sub>1,9</sub> -9 <sub>1,8</sub>                      | 96982.440          | 5.29(3)                            | 0.49(8)                             | 0.006               | 0.0031(3)                                  |       |
| H <sup>13</sup> CCCN                      | 11-10                                                    | 96983.001          | 5.30(3)                            | 0.50(3)                             | 0.042               | 0.022(2)                                   |       |
| CH <sub>2</sub> DCCH                      | 6 <sub>2,5</sub> -5 <sub>2,4</sub>                       | 97077.804          | 5.25(3)                            | 0.36(3)                             | 0.018               | 0.0069(6)                                  |       |
| CH <sub>2</sub> DCCH                      | 6 <sub>0,6</sub> -5 <sub>0,5</sub>                       | 97080.728          | 5.26(3)                            | 0.36(3)                             | 0.187               | 0.072(7)                                   |       |
| CH <sub>2</sub> DCCH                      | 6 <sub>2,4</sub> -5 <sub>2,3</sub>                       | 97081.710          | 5.29(3)                            | 0.33(3)                             | 0.020               | 0.0072(7)                                  |       |
| C <sub>4</sub> D                          | N=11-10 J=23/2-21/2                                      | 97139.974          | 5.35(3)                            | 0.32(6)                             | 0.007               | 0.0023(2)                                  |       |
| HC <sub>3</sub> <sup>15</sup> N           | 11-10                                                    | 97165.829          | 5.32(7)                            | 0.44(22)                            | 0.009               | 0.004(2)                                   |       |
| C <sup>33</sup> S                         | J=2-1 F=3/2-3/2                                          | 97169.471          | 5.37(3)                            | 0.62(30)                            | 0.015               | 0.010(5)                                   |       |
| C <sup>33</sup> S                         | J=2-1 F=5/2-3/2                                          | 97171.801          |                                    |                                     | 0.093               | 0.087(8)                                   | 1, 3  |
| C <sup>33</sup> S                         | J=2-1 F=7/2-5/2                                          | 97171.819          |                                    |                                     |                     |                                            | 1, 3  |
| C <sup>33</sup> S                         | J=2-1 F=1/2-1/2                                          | 97172.031          |                                    |                                     |                     |                                            | 1, 3  |
| C <sup>33</sup> S                         | J=2-1 F=5/2-5/2                                          | 97174.956          | 5.30(28)                           | 0.86(43)                            | 0.014               | 0.013(6)                                   | 4     |
| C <sup>33</sup> S                         | J=2-1 F=3/2-1/2                                          | 97175.257          | 5.28(20)                           | 0.61(30)                            | 0.013               | 0.009(4)                                   | 4     |
| C <sub>4</sub> D                          | N=11-10 J=21/2-19/2                                      | 97175.928          | 5.25(27)                           | 0.33(16)                            | 0.006               | 0.002(1)                                   |       |
| OCS                                       | 8-7                                                      | 97301.209          | 5.32(3)                            | 0.55(3)                             | 0.092               | 0.054(5)                                   |       |
| CH <sub>2</sub> DCCH                      | 6 <sub>1,5</sub> -5 <sub>1,4</sub>                       | 97472.736          | 5.26(3)                            | 0.39(3)                             | 0.106               | 0.044(4)                                   |       |
| CH <sub>3</sub> OH                        | 2 <sub>1</sub> -1 <sub>1</sub> A-                        | 97582.798          | 5.38(3)                            | 0.85(3)                             | 0.039               | 0.035(3)                                   |       |
| H <sub>2</sub> <sup>13</sup> CS           | 3 <sub>1,3</sub> -2 <sub>1,2</sub>                       | 97632.202          | 5.25(3)                            | 0.41(7)                             | 0.007               | 0.0030(2)                                  |       |
| NCCNH <sup>+</sup>                        | 11-10                                                    | 97633.424          | 5.30(3)                            | 0.35(6)                             | 0.006               | 0.0024(2)                                  |       |
| <sup>34</sup> SO                          | 2 <sub>3</sub> -1 <sub>2</sub>                           | 97715.317          | 5.04(3)                            | 0.42(3)                             | 0.385               | 0.173(17)                                  |       |
| <i>c</i> -C <sub>3</sub> D <sub>2</sub>   | 3 <sub>1,3</sub> -2 <sub>0,2</sub>                       | 97761.978          | 5.31(3)                            | 0.39(3)                             | 0.112               | 0.047(4)                                   |       |
| H <sub>2</sub> C <sub>4</sub>             | 11 <sub>1,11</sub> -10 <sub>1,10</sub>                   | 97833.632          | 5.29(3)                            | 0.43(3)                             | 0.020               | 0.0089(8)                                  |       |
| CS                                        | 2-1                                                      | 97980.953          |                                    |                                     | 1.781               | 3.513(351)                                 | 1     |
| <i>l</i> -C <sub>3</sub> H                | <sup>2</sup> Π <sub>1/2</sub> J=9/2-7/2 F=5-4 <i>f</i>   | 97995.166          | 5.22(3)                            | 0.47(3)                             | 0.097               | 0.048(4)                                   |       |
| <i>l</i> -C <sub>3</sub> H                | <sup>2</sup> Π <sub>1/2</sub> J=9/2-7/2 F=4-3 <i>f</i>   | 97995.913          | 5.21(3)                            | 0.43(3)                             | 0.076               | 0.034(3)                                   |       |
| <i>l</i> -C <sub>3</sub> H                | <sup>2</sup> Π <sub>1/2</sub> J=9/2-7/2 F=5-4 <i>e</i>   | 98011.611          | 5.23(3)                            | 0.44(3)                             | 0.100               | 0.047(4)                                   |       |
| <i>l</i> -C <sub>3</sub> H                | <sup>2</sup> Π <sub>1/2</sub> J=9/2-7/2 F=4-3 <i>e</i>   | 98012.524          | 5.16(3)                            | 0.42(3)                             | 0.078               | 0.035(3)                                   |       |
| CH <sub>2</sub> DOH                       | 4 <sub>0,4</sub> -3 <sub>1,3</sub> <i>e</i> <sub>0</sub> | 98031.213          | 4.87(3)                            | 0.46(3)                             | 0.018               | 0.009(1)                                   |       |
| <i>c</i> -C <sub>3</sub> H <sub>2</sub> O | 7 <sub>2,6</sub> -6 <sub>2,5</sub>                       | 98182.078          | 5.28(13)                           | 0.40(14)                            | 0.006               | 0.0026(2)                                  |       |
| H <sub>2</sub> C <sub>4</sub>             | 11 <sub>0,11</sub> -10 <sub>0,10</sub>                   | 98244.930          | 5.17(3)                            | 0.57(5)                             | 0.012               | 0.0072(7)                                  |       |
| C <sub>3</sub> S                          | 17-16                                                    | 98268.516          | 5.30(5)                            | 0.42(3)                             | 0.031               | 0.014(1)                                   |       |
| <sup>33</sup> SO                          | 2 <sub>3</sub> -1 <sub>2</sub> F=3/2-3/2                 | 98460.488          | 5.20(3)                            | 0.50(11)                            | 0.005               | 0.0025(2)                                  | 5     |
| <sup>33</sup> SO                          | 2 <sub>3</sub> -1 <sub>2</sub> F=3/2-1/2                 | 98474.602          | 5.14(13)                           | 0.38(14)                            | 0.008               | 0.0031(3)                                  |       |
| <sup>33</sup> SO                          | 2 <sub>3</sub> -1 <sub>2</sub> F=5/2-3/2                 | 98482.302          | 5.23(13)                           | 0.42(14)                            | 0.012               | 0.0053(5)                                  |       |
| <sup>33</sup> SO                          | 2 <sub>3</sub> -1 <sub>2</sub> F=7/2-5/2                 | 98489.232          | 5.25(45)                           | 0.44(3)                             | 0.021               | 0.010(1)                                   |       |
| <sup>33</sup> SO                          | 2 <sub>3</sub> -1 <sub>2</sub> F=9/2-7/2                 | 98493.642          | 5.24(3)                            | 0.39(3)                             | 0.035               | 0.014(1)                                   |       |
| HC <sub>3</sub> N                         | 37-36                                                    | 98512.524          | 5.39(3)                            | 0.98(6)                             | 0.022               | 0.023(2)                                   |       |
| H <sub>2</sub> C <sub>4</sub>             | 11 <sub>1,10</sub> -10 <sub>1,9</sub>                    | 98655.094          | 5.26(19)                           | 0.56(4)                             | 0.019               | 0.011(1)                                   |       |
| CH <sub>3</sub> CHO                       | 5 <sub>1,4</sub> -4 <sub>1,3</sub> E                     | 98863.314          | 5.27(13)                           | 0.65(14)                            | 0.040               | 0.028(2)                                   |       |
| CH <sub>3</sub> CHO                       | 5 <sub>1,4</sub> -4 <sub>1,3</sub> A                     | 98900.945          | 5.31(3)                            | 0.65(5)                             | 0.039               | 0.027(2)                                   |       |
| C <sub>3</sub> N                          | N=10-9 J=21/2-19/2                                       | 98940.009          | 5.26(3)                            | 0.41(3)                             | 0.035               | 0.015(1)                                   |       |
| C <sub>3</sub> N                          | N=10-9 J=19/2-17/2                                       | 98958.770          | 5.26(3)                            | 0.53(3)                             | 0.030               | 0.017(1)                                   |       |
| HCCCHO                                    | 4 <sub>1,4</sub> -3 <sub>0,3</sub>                       | 99039.070          | 5.25(3)                            | 0.48(3)                             | 0.010               | 0.0052(5)                                  |       |
| H <sub>2</sub> <sup>13</sup> CS           | 3 <sub>0,3</sub> -2 <sub>0,2</sub>                       | 99077.843          | 5.33(3)                            | 0.49(8)                             | 0.008               | 0.0042(4)                                  |       |
| <i>c</i> -C <sub>3</sub> H <sub>2</sub> O | 7 <sub>3,5</sub> -6 <sub>3,4</sub>                       | 99204.772          | 5.27(3)                            | 0.35(7)                             | 0.005               | 0.0019(1)                                  |       |
| SO                                        | 2 <sub>3</sub> -1 <sub>2</sub>                           | 99299.870          |                                    |                                     | 2.386               | 1.609(160)                                 | 1     |

Table A.1. continued.

| Molecule                           | Transition                                                                          | Frequency<br>(MHz) | $V_{LSR}$<br>(km s <sup>-1</sup> ) | $\Delta v$<br>(km s <sup>-1</sup> ) | $T_A^*$ peak<br>(K) | $\int T_A^* dv$<br>(K km s <sup>-1</sup> ) | Notes |
|------------------------------------|-------------------------------------------------------------------------------------|--------------------|------------------------------------|-------------------------------------|---------------------|--------------------------------------------|-------|
| CH <sub>3</sub> OCH <sub>3</sub>   | 4 <sub>1,4</sub> -3 <sub>0,3</sub> EA + AE                                          | 99324.363          | 5.29(3)                            | 0.46(5)                             | 0.012               | 0.0059(5)                                  |       |
| CH <sub>3</sub> OCH <sub>3</sub>   | 4 <sub>1,4</sub> -3 <sub>0,3</sub> EE                                               | 99325.217          | 5.31(3)                            | 0.51(4)                             | 0.015               | 0.0081(8)                                  |       |
| CH <sub>3</sub> OCH <sub>3</sub>   | 4 <sub>1,4</sub> -3 <sub>0,3</sub> AA                                               | 99326.072          | 5.31(3)                            | 0.45(7)                             | 0.009               | 0.004(1)                                   |       |
| HCCNC                              | 10-9                                                                                | 99354.250          | 5.28(3)                            | 0.46(3)                             | 0.054               | 0.026(2)                                   |       |
| c-C <sub>3</sub> H <sub>2</sub> O  | 7 <sub>3,4</sub> -6 <sub>3,3</sub>                                                  | 99461.077          | 5.28(3)                            | 0.43(6)                             | 0.009               | 0.0039(3)                                  |       |
| CH <sub>3</sub> C <sup>13</sup> CH | 6 <sub>1</sub> -5 <sub>1</sub>                                                      | 99478.690          | 5.22(3)                            | 0.40(3)                             | 0.017               | 0.007(1)                                   |       |
| CH <sub>3</sub> C <sup>13</sup> CH | 6 <sub>0</sub> -5 <sub>0</sub>                                                      | 99480.520          | 5.14(3)                            | 0.44(3)                             | 0.018               | 0.008(1)                                   |       |
| HC <sup>13</sup> CCN               | 11-10                                                                               | 99651.849          | 5.29(4)                            | 0.53(4)                             | 0.045               | 0.025(2)                                   |       |
| HCC <sup>13</sup> CN               | 11-10                                                                               | 99661.467          | 5.30(3)                            | 0.51(3)                             | 0.049               | 0.027(2)                                   |       |
| CH <sub>2</sub> CN                 | 5 <sub>1,5</sub> -4 <sub>1,4</sub> J=9/2-7/2 F=7/2-5/2                              | 99668.885          | 5.25(13)                           | 0.28(13)                            | 0.007               | 0.0019(1)                                  | 2     |
| CH <sub>2</sub> CN                 | 5 <sub>1,5</sub> -4 <sub>1,4</sub> J=9/2-7/2 F=11/2-9/2                             | 99669.243          | 5.33(13)                           | 0.44(14)                            | 0.009               | 0.0043(4)                                  |       |
| CH <sub>2</sub> CN                 | 5 <sub>1,5</sub> -4 <sub>1,4</sub> J=11/2-9/2 F=9/2-7/2                             | 99689.121          | 5.30(4)                            | 0.43(9)                             | 0.007               | 0.0032(3)                                  |       |
| CH <sub>2</sub> CN                 | 5 <sub>1,5</sub> -4 <sub>1,4</sub> J=11/2-9/2 F=11/2-9/2                            | 99689.833          | 6.01(4)                            | 0.69(10)                            | 0.008               | 0.006(1)                                   | 6     |
| CH <sub>2</sub> CN                 | 5 <sub>1,5</sub> -4 <sub>1,4</sub> J=11/2-9/2 F=13/2-11/2                           | 99689.833          | 5.17(3)                            | 0.53(7)                             | 0.011               | 0.006(1)                                   | 6     |
| <sup>13</sup> CH <sub>3</sub> CCH  | 6 <sub>1</sub> -5 <sub>1</sub>                                                      | 99754.700          | 5.28(3)                            | 0.38(3)                             | 0.016               | 0.0066(6)                                  |       |
| <sup>13</sup> CH <sub>3</sub> CCH  | 6 <sub>0</sub> -5 <sub>0</sub>                                                      | 99756.550          | 5.27(3)                            | 0.40(3)                             | 0.017               | 0.0072(7)                                  |       |
| H <sub>2</sub> C <sup>34</sup> S   | 3 <sub>1,3</sub> -2 <sub>1,2</sub>                                                  | 99774.122          | 5.39(3)                            | 0.52(3)                             | 0.022               | 0.012(1)                                   |       |
| C <sub>2</sub> S                   | 8 <sub>7</sub> -7 <sub>6</sub>                                                      | 99866.521          | 5.35(3)                            | 0.55(3)                             | 0.117               | 0.068(6)                                   |       |
| SO                                 | 5 <sub>4</sub> -4 <sub>4</sub>                                                      | 100029.558         | 5.59(3)                            | 0.92(10)                            | 0.008               | 0.007(1)                                   |       |
| HC <sub>3</sub> N                  | 11-10 F=11-11                                                                       | 100074.832         | 5.30(13)                           | 0.38(14)                            | 0.014               | 0.005(2)                                   |       |
| HC <sub>3</sub> N                  | 11-10                                                                               | 100076.392         |                                    |                                     | 1.947               | 1.473(147)                                 | 1     |
| HC <sub>3</sub> N                  | 11-10 F=10-10                                                                       | 100078.078         | 5.29(13)                           | 0.48(14)                            | 0.008               | 0.004(2)                                   |       |
| HCOOCH <sub>3</sub>                | 9 <sub>1,9</sub> -8 <sub>1,8</sub> E                                                | 100078.608         | 5.29(13)                           | 0.58(14)                            | 0.004               | 0.003(1)                                   | 5     |
| HCOOCH <sub>3</sub>                | 9 <sub>1,9</sub> -8 <sub>1,8</sub> A                                                | 100080.542         | 5.32(13)                           | 0.46(14)                            | 0.008               | 0.004(1)                                   |       |
| H <sub>2</sub> CCO                 | 5 <sub>1,5</sub> -4 <sub>1,4</sub>                                                  | 100094.514         | 5.30(2)                            | 0.50(2)                             | 0.112               | 0.060(6)                                   |       |
| NS <sup>+</sup>                    | 2-1 F=2-2                                                                           | 100196.674         | 5.37(13)                           | 0.64(14)                            | 0.007               | 0.005(1)                                   |       |
| NS <sup>+</sup>                    | 2-1 F=1-0                                                                           | 100196.982         | 5.30(13)                           | 0.50(14)                            | 0.010               | 0.005(1)                                   |       |
| NS <sup>+</sup>                    | 2-1 F=2-1                                                                           | 100198.474         | 5.03(13)                           | 0.73(14)                            | 0.035               | 0.027(2)                                   | 3     |
| NS <sup>+</sup>                    | 2-1 F=3-2                                                                           | 100198.613         |                                    |                                     |                     |                                            | 3     |
| NS <sup>+</sup>                    | 2-1 F=1-1                                                                           | 100201.410         | 5.23(13)                           | 0.45(14)                            | 0.007               | 0.003(1)                                   |       |
| H <sub>2</sub> NCO <sup>+</sup>    | 5 <sub>1,5</sub> -4 <sub>1,4</sub>                                                  | 100307.079         | 5.37(4)                            | 0.49(4)                             | 0.008               | 0.0040(4)                                  |       |
| DCO <sub>2</sub> <sup>+</sup>      | 5 <sub>0,5</sub> -4 <sub>0,4</sub>                                                  | 100359.521         | 5.25(11)                           | 0.31(7)                             | 0.005               | 0.0015(1)                                  | 5     |
| HCOOCH <sub>3</sub>                | 8 <sub>1,7</sub> -7 <sub>1,6</sub> E                                                | 100482.241         | 5.28(2)                            | 0.41(6)                             | 0.009               | 0.0039(3)                                  |       |
| HCOOCH <sub>3</sub>                | 8 <sub>1,7</sub> -7 <sub>1,6</sub> A                                                | 100490.682         | 5.29(8)                            | 0.90(18)                            | 0.006               | 0.006(1)                                   |       |
| N <sub>2</sub> O                   | 4-3                                                                                 | 100491.740         | 5.39(4)                            | 0.47(7)                             | 0.008               | 0.0039(3)                                  |       |
| CH <sub>3</sub> NC                 | 5 <sub>1</sub> -4 <sub>1</sub>                                                      | 100524.249         | 5.14(4)                            | 0.91(25)                            | 0.005               | 0.005(1)                                   |       |
| CH <sub>3</sub> NC                 | 5 <sub>0</sub> -4 <sub>0</sub>                                                      | 100526.541         | 5.37(2)                            | 0.72(7)                             | 0.008               | 0.006(1)                                   |       |
| H <sub>2</sub> <sup>13</sup> CS    | 3 <sub>1,2</sub> -2 <sub>1,1</sub>                                                  | 100534.751         | 5.43(2)                            | 0.40(6)                             | 0.008               | 0.0034(3)                                  |       |
| CH <sub>2</sub> CN                 | 5 <sub>0,5</sub> -4 <sub>0,4</sub> J=11/2-9/2 F <sub>1</sub> =13/2-11/2 F=15/2-13/2 | 100598.383         | 5.29(2)                            | 0.83(6)                             | 0.059               | 0.052(5)                                   | 3     |
| CH <sub>2</sub> CN                 | 5 <sub>0,5</sub> -4 <sub>0,4</sub> J=11/2-9/2 F <sub>1</sub> =13/2-11/2 F=13/2-11/2 | 100598.383         |                                    |                                     |                     |                                            | 3     |
| CH <sub>2</sub> CN                 | 5 <sub>0,5</sub> -4 <sub>0,4</sub> J=11/2-9/2 F <sub>1</sub> =13/2-11/2 F=11/2-9/2  | 100598.383         |                                    |                                     |                     |                                            | 3     |
| CH <sub>2</sub> CN                 | 5 <sub>0,5</sub> -4 <sub>0,4</sub> J=11/2-9/2 F <sub>1</sub> =11/2-9/2 F=9/2-7/2    | 100599.499         | 5.38(4)                            | 0.51(15)                            | 0.019               | 0.010(2)                                   |       |
| CH <sub>2</sub> CN                 | 5 <sub>0,5</sub> -4 <sub>0,4</sub> J=11/2-9/2 F <sub>1</sub> =11/2-9/2 F=11/2-9/2   | 100599.943         | 5.33(2)                            | 0.49(10)                            | 0.026               | 0.014(2)                                   | 2     |
| CH <sub>2</sub> CN                 | 5 <sub>0,5</sub> -4 <sub>0,4</sub> J=11/2-9/2 F <sub>1</sub> =11/2-9/2 F=13/2-11/2  | 100600.602         | 5.32(2)                            | 0.60(10)                            | 0.036               | 0.023(3)                                   | 3     |
| CH <sub>2</sub> CN                 | 5 <sub>0,5</sub> -4 <sub>0,4</sub> J=11/2-9/2 F <sub>1</sub> =9/2-7/2 F=7/2-5/2     | 100600.602         |                                    |                                     |                     |                                            | 3     |
| CH <sub>2</sub> CN                 | 5 <sub>0,5</sub> -4 <sub>0,4</sub> J=11/2-9/2 F <sub>1</sub> =9/2-7/2 F=9/2-7/2     | 100601.354         | 5.32(2)                            | 0.48(20)                            | 0.019               | 0.010(4)                                   | 2     |
| CH <sub>2</sub> CN                 | 5 <sub>0,5</sub> -4 <sub>0,4</sub> J=11/2-9/2 F <sub>1</sub> =9/2-7/2 F=11/2-9/2    | 100602.459         | 5.39(26)                           | 0.51(25)                            | 0.007               | 0.004(2)                                   | 2     |
| CH <sub>2</sub> CN                 | 5 <sub>0,5</sub> -4 <sub>0,4</sub> J=9/2-7/2 F <sub>1</sub> =9/2-7/2 F=11/2-9/2     | 100606.271         | 5.30(6)                            | 0.60(21)                            | 0.028               | 0.018(4)                                   |       |
| CH <sub>2</sub> CN                 | 5 <sub>0,5</sub> -4 <sub>0,4</sub> J=9/2-7/2 F <sub>1</sub> =9/2-7/2 F=9/2-7/2      | 100607.373         | 5.32(6)                            | 0.47(19)                            | 0.021               | 0.010(3)                                   | 2     |
| CH <sub>2</sub> CN                 | 5 <sub>0,5</sub> -4 <sub>0,4</sub> J=9/2-7/2 F <sub>1</sub> =9/2-7/2 F=7/2-5/2      | 100608.257         | 5.30(15)                           | 0.53(26)                            | 0.014               | 0.008(3)                                   | 2     |
| CH <sub>2</sub> CN                 | 5 <sub>0,5</sub> -4 <sub>0,4</sub> J=9/2-7/2 F <sub>1</sub> =11/2-9/2 F=13/2-11/2   | 100608.832         | 5.30(13)                           | 0.53(14)                            | 0.032               | 0.018(1)                                   | 2     |
| CH <sub>2</sub> CN                 | 5 <sub>0,5</sub> -4 <sub>0,4</sub> J=9/2-7/2 F <sub>1</sub> =11/2-9/2 F=11/2-9/2    | 100609.210         | 5.34(13)                           | 0.47(14)                            | 0.025               | 0.012(1)                                   |       |
| CH <sub>2</sub> CN                 | 5 <sub>0,5</sub> -4 <sub>0,4</sub> J=9/2-7/2 F <sub>1</sub> =11/2-9/2 F=9/2-7/2     | 100609.663         | 5.35(13)                           | 0.48(14)                            | 0.023               | 0.012(1)                                   | 2, 3  |
| CH <sub>2</sub> CN                 | 5 <sub>0,5</sub> -4 <sub>0,4</sub> J=9/2-7/2 F <sub>1</sub> =7/2-5/2 F=7/2-5/2      | 100609.663         |                                    |                                     |                     |                                            | 2, 3  |
| CH <sub>2</sub> CN                 | 5 <sub>0,5</sub> -4 <sub>0,4</sub> J=9/2-7/2 F <sub>1</sub> =7/2-5/2 F=9/2-7/2      | 100610.152         | 5.40(13)                           | 0.83(14)                            | 0.020               | 0.017(1)                                   | 3     |
| CH <sub>2</sub> CN                 | 5 <sub>0,5</sub> -4 <sub>0,4</sub> J=9/2-7/2 F <sub>1</sub> =7/2-5/2 F=5/2-3/2      | 100610.152         |                                    |                                     |                     |                                            | 3     |
| c-C <sub>3</sub> D                 | 2 <sub>1,1</sub> -1 <sub>1,0</sub> J=5/2-3/2 F=7/2-5/2                              | 100807.790         | 5.22(2)                            | 0.35(3)                             | 0.020               | 0.008(1)                                   | 3     |
| c-C <sub>3</sub> D                 | 2 <sub>1,1</sub> -1 <sub>1,0</sub> J=5/2-3/2 F=5/2-3/2                              | 100807.840         |                                    |                                     |                     |                                            | 3     |
| c-C <sub>3</sub> D                 | 2 <sub>1,1</sub> -1 <sub>1,0</sub> J=5/2-3/2 F=3/2-1/2                              | 100807.987         |                                    |                                     |                     |                                            | 3     |
| CH <sub>3</sub> SH                 | 4 <sub>-1</sub> -3 <sub>-1</sub> E                                                  | 101029.707         | 5.29(8)                            | 0.50(10)                            | 0.008               | 0.004(1)                                   | 2     |
| H <sub>2</sub> CCO                 | 5 <sub>0,5</sub> -4 <sub>0,4</sub>                                                  | 101036.630         | 5.32(2)                            | 0.50(2)                             | 0.067               | 0.035(3)                                   |       |
| H <sub>2</sub> NCO <sup>+</sup>    | 5 <sub>0,5</sub> -4 <sub>0,4</sub>                                                  | 101131.138         | 5.43(10)                           | 0.73(26)                            | 0.006               | 0.005(1)                                   |       |
| CH <sub>3</sub> SH                 | 4 <sub>0</sub> -3 <sub>0</sub> A+                                                   | 101139.111         | 5.41(2)                            | 0.88(5)                             | 0.020               | 0.019(1)                                   |       |
| CH <sub>3</sub> SH                 | 4 <sub>0</sub> -3 <sub>0</sub> E                                                    | 101139.632         | 5.39(14)                           | 0.73(4)                             | 0.024               | 0.018(1)                                   |       |
| HC <sub>3</sub> N                  | 38-37                                                                               | 101174.677         | 5.36(2)                            | 0.71(5)                             | 0.021               | 0.016(1)                                   |       |
| H <sub>2</sub> C <sup>34</sup> S   | 3 <sub>0,3</sub> -2 <sub>0,2</sub>                                                  | 101284.338         | 5.32(2)                            | 0.64(5)                             | 0.022               | 0.015(1)                                   | 3     |

Table A.1. continued.

| Molecule                          | Transition                                              | Frequency<br>(MHz) | $V_{\text{LSR}}$<br>(km s <sup>-1</sup> ) | $\Delta v$<br>(km s <sup>-1</sup> ) | $T_A^*$ peak<br>(K) | $\int T_A^* dv$<br>(K km s <sup>-1</sup> ) | Notes |
|-----------------------------------|---------------------------------------------------------|--------------------|-------------------------------------------|-------------------------------------|---------------------|--------------------------------------------|-------|
| CH <sub>3</sub> SH                | 4 <sub>1</sub> -3 <sub>1</sub> E                        | 101284.348         |                                           |                                     |                     |                                            | 3     |
| DC <sub>3</sub> N                 | 12-11                                                   | 101314.818         | 5.31(2)                                   | 0.43(2)                             | 0.108               | 0.049(4)                                   |       |
| CH <sub>3</sub> CHO               | 3 <sub>1,3</sub> -2 <sub>0,2</sub> E                    | 101343.441         | 5.33(2)                                   | 0.56(7)                             | 0.017               | 0.010(1)                                   |       |
| H <sub>2</sub> CS                 | 3 <sub>1,3</sub> -2 <sub>1,2</sub>                      | 101477.810         |                                           |                                     | 0.580               | 0.404(40)                                  | 1     |
| CH <sub>2</sub> CN                | 5 <sub>1,4</sub> -4 <sub>1,3</sub> J=9/2-7/2 F=11/2-9/2 | 101522.773         | 5.43(10)                                  | 0.51(8)                             | 0.013               | 0.007(1)                                   | 4     |
| CH <sub>2</sub> CN                | 5 <sub>1,4</sub> -4 <sub>1,3</sub> J=9/2-7/2 F=9/2-7/2  | 101523.088         | 5.33(8)                                   | 0.93(15)                            | 0.010               | 0.010(1)                                   | 4     |
| CH <sub>2</sub> CN                | 5 <sub>1,4</sub> -4 <sub>1,3</sub> J=9/2-7/2 F=7/2-5/2  | 101523.657         | 5.18(6)                                   | 0.95(15)                            | 0.008               | 0.008(1)                                   |       |
| CH <sub>2</sub> CN                | 5 <sub>1,4</sub> -4 <sub>1,3</sub> J=11/2-9/2           | 101532.055         | 5.32(2)                                   | 0.78(9)                             | 0.024               | 0.020(2)                                   |       |
| CH <sub>3</sub> CHO               | 3 <sub>1,3</sub> -2 <sub>0,2</sub> A                    | 101892.414         | 5.19(44)                                  | 0.62(8)                             | 0.013               | 0.009(1)                                   |       |
| H <sub>2</sub> NCO <sup>+</sup>   | 5 <sub>1,4</sub> -4 <sub>1,3</sub>                      | 101955.873         | 5.17(12)                                  | 0.49(11)                            | 0.010               | 0.005(1)                                   |       |
| DNCO                              | 5 <sub>0,5</sub> -4 <sub>0,4</sub>                      | 101963.694         | 5.38(10)                                  | 0.39(2)                             | 0.065               | 0.028(2)                                   |       |
| H <sub>2</sub> CCO                | 5 <sub>1,4</sub> -4 <sub>1,3</sub>                      | 101981.429         | 5.26(2)                                   | 0.55(2)                             | 0.117               | 0.068(6)                                   |       |
| <sup>34</sup> SO <sub>2</sub>     | 3 <sub>1,3</sub> -2 <sub>0,2</sub>                      | 102031.878         | 5.24(2)                                   | 0.29(4)                             | 0.011               | 0.0034(3)                                  |       |
| c-HC <sup>13</sup> CCD            | 3 <sub>0,3</sub> -2 <sub>1,2</sub>                      | 102143.545         | 5.29(2)                                   | 0.57(13)                            | 0.008               | 0.005(1)                                   |       |
| c-C <sub>3</sub> D <sub>2</sub>   | 3 <sub>1,2</sub> -2 <sub>2,1</sub>                      | 102248.513         | 5.32(28)                                  | 0.41(6)                             | 0.012               | 0.005(1)                                   |       |
| HCCCHO                            | 11 <sub>0,11</sub> -10 <sub>0,10</sub>                  | 102298.030         | 5.13(13)                                  | 0.41(14)                            | 0.014               | 0.0062(6)                                  | 2     |
| c-HCC <sup>13</sup> CD            | 3 <sub>0,3</sub> -2 <sub>1,2</sub>                      | 102305.490         | 5.21(13)                                  | 0.31(14)                            | 0.014               | 0.0047(4)                                  | 2     |
| c-H <sup>13</sup> CCCD            | 3 <sub>0,3</sub> -2 <sub>1,2</sub>                      | 102422.058         | 5.33(2)                                   | 0.35(3)                             | 0.013               | 0.0047(4)                                  |       |
| c-C <sub>3</sub> HD               | 4 <sub>1,3</sub> -4 <sub>0,4</sub>                      | 102423.019         | 5.27(2)                                   | 0.41(2)                             | 0.031               | 0.014(1)                                   |       |
| CH <sub>3</sub> <sup>13</sup> CCH | 6 <sub>1</sub> -5 <sub>1</sub>                          | 102503.460         | 5.18(3)                                   | 0.49(5)                             | 0.014               | 0.007(1)                                   |       |
| CH <sub>3</sub> <sup>13</sup> CCH | 6 <sub>0</sub> -5 <sub>0</sub>                          | 102505.410         | 5.19(2)                                   | 0.58(5)                             | 0.018               | 0.011(1)                                   |       |
| CH <sub>3</sub> CCH               | 6 <sub>3</sub> -5 <sub>3</sub>                          | 102530.348         | 5.33(43)                                  | 0.69(34)                            | 0.016               | 0.011(5)                                   |       |
| CH <sub>3</sub> CCH               | 6 <sub>2</sub> -5 <sub>2</sub>                          | 102540.145         | 5.30(8)                                   | 0.53(23)                            | 0.118               | 0.067(24)                                  |       |
| CH <sub>3</sub> CCH               | 6 <sub>1</sub> -5 <sub>1</sub>                          | 102546.024         | 5.29(2)                                   | 0.49(2)                             | 0.803               | 0.417(41)                                  |       |
| CH <sub>3</sub> CCH               | 6 <sub>0</sub> -5 <sub>0</sub>                          | 102547.984         | 5.30(2)                                   | 0.49(2)                             | 0.877               | 0.460(46)                                  |       |
| H <sub>2</sub> C <sup>34</sup> S  | 3 <sub>1,2</sub> -2 <sub>1,1</sub>                      | 102807.385         | 5.43(2)                                   | 0.62(4)                             | 0.023               | 0.015(1)                                   |       |
| l-C <sub>3</sub> H <sub>2</sub>   | 5 <sub>1,5</sub> -4 <sub>1,4</sub>                      | 102992.379         | 5.27(43)                                  | 0.44(2)                             | 0.115               | 0.054(5)                                   |       |
| H <sub>2</sub> CS                 | 3 <sub>0,3</sub> -2 <sub>0,2</sub>                      | 103040.452         |                                           |                                     | 0.503               | 0.317(31)                                  | 1     |
| c-C <sub>3</sub> H <sub>2</sub> O | 7 <sub>1,6</sub> -6 <sub>1,5</sub>                      | 103069.925         | 5.31(2)                                   | 0.48(4)                             | 0.021               | 0.011(1)                                   |       |
| HCOOCH <sub>3</sub>               | 8 <sub>2,6</sub> -7 <sub>2,5</sub> E                    | 103466.572         | 5.24(13)                                  | 0.63(14)                            | 0.007               | 0.0046(4)                                  |       |
| HCOOCH <sub>3</sub>               | 8 <sub>2,6</sub> -7 <sub>2,5</sub> A                    | 103478.663         | 5.27(4)                                   | 0.66(13)                            | 0.008               | 0.006(1)                                   |       |
| CNCN                              | 10-9                                                    | 103479.802         | 5.38(7)                                   | 0.47(4)                             | 0.014               | 0.0069(6)                                  |       |
| C <sub>2</sub> S                  | 8 <sub>8</sub> -7 <sub>7</sub>                          | 103640.759         | 5.35(2)                                   | 0.64(2)                             | 0.098               | 0.066(6)                                   |       |
| HC <sub>3</sub> N                 | 39-38                                                   | 103836.817         | 5.49(8)                                   | 0.93(6)                             | 0.019               | 0.019(1)                                   |       |
| l-C <sub>3</sub> H <sub>2</sub>   | 5 <sub>0,5</sub> -4 <sub>0,4</sub>                      | 103952.926         | 5.32(2)                                   | 0.45(2)                             | 0.074               | 0.035(3)                                   |       |
| SO <sub>2</sub>                   | 3 <sub>1,3</sub> -2 <sub>0,2</sub>                      | 104029.418         | 5.27(2)                                   | 0.42(2)                             | 0.242               | 0.107(10)                                  |       |
| C <sub>3</sub> S                  | 18-17                                                   | 104048.455         | 5.36(2)                                   | 0.55(5)                             | 0.015               | 0.009(1)                                   |       |
| C <sub>2</sub> <sup>34</sup> S    | 8 <sub>9</sub> -7 <sub>8</sub>                          | 104109.331         | 5.30(2)                                   | 0.54(5)                             | 0.015               | 0.009(1)                                   |       |
| c-C <sub>3</sub> HD               | 3 <sub>0,3</sub> -2 <sub>1,2</sub>                      | 104187.126         | 5.30(2)                                   | 0.41(2)                             | 0.649               | 0.283(28)                                  |       |
| CH <sub>2</sub> DCN               | 6 <sub>0,6</sub> -5 <sub>0,5</sub>                      | 104198.143         | 5.30(2)                                   | 0.45(4)                             | 0.011               | 0.0054(5)                                  |       |
| H <sub>2</sub> CS                 | 3 <sub>1,2</sub> -2 <sub>1,1</sub>                      | 104617.040         |                                           |                                     | 0.611               | 0.371(37)                                  | 1     |
| NCO                               | <sup>2</sup> Π <sub>3/2</sub> J=9/2-7/2 F=11/2-9/2 e    | 104665.278         | 5.50(6)                                   | 0.61(11)                            | 0.006               | 0.004(1)                                   |       |
| NCO                               | <sup>2</sup> Π <sub>3/2</sub> J=9/2-7/2 F=11/2-9/2 f    | 104666.098         | 5.36(2)                                   | 0.60(10)                            | 0.008               | 0.005(1)                                   |       |
| C <sub>4</sub> H                  | N=11-10 J=23/2-21/2                                     | 104666.568         | 5.34(2)                                   | 0.52(2)                             | 0.199               | 0.110(10)                                  |       |
| NCO                               | <sup>2</sup> Π <sub>3/2</sub> J=9/2-7/2 F=9/2-7/2 e     | 104670.139         | 5.32(2)                                   | 0.71(17)                            | 0.006               | 0.005(1)                                   |       |
| NCO                               | <sup>2</sup> Π <sub>3/2</sub> J=9/2-7/2 F=9/2-7/2 f     | 104670.905         | 5.35(3)                                   | 0.38(9)                             | 0.009               | 0.004(1)                                   |       |
| C <sub>4</sub> H                  | N=11-10 J=21/2-19/2                                     | 104705.108         | 5.29(13)                                  | 0.54(13)                            | 0.174               | 0.100(9)                                   |       |
| <sup>13</sup> C <sup>18</sup> O   | 1-0                                                     | 104711.404         | 5.49(13)                                  | 0.86(13)                            | 0.092               | 0.085(8)                                   |       |
| c-C <sub>3</sub> HD               | 3 <sub>1,3</sub> -2 <sub>1,2</sub>                      | 104799.707         | 5.30(2)                                   | 0.40(2)                             | 0.172               | 0.073(7)                                   |       |
| HOCN                              | 5 <sub>0,5</sub> -4 <sub>0,4</sub>                      | 104874.678         | 5.30(33)                                  | 0.43(2)                             | 0.076               | 0.035(3)                                   |       |
| l-C <sub>3</sub> H <sub>2</sub>   | 5 <sub>1,4</sub> -4 <sub>1,3</sub>                      | 104915.583         | 5.28(2)                                   | 0.42(2)                             | 0.116               | 0.052(5)                                   |       |
| c-H <sup>13</sup> CCCD            | 3 <sub>1,3</sub> -2 <sub>0,2</sub>                      | 105459.577         | 5.32(2)                                   | 0.31(8)                             | 0.008               | 0.003(1)                                   |       |
| c-C <sub>3</sub> H <sub>2</sub> O | 8 <sub>1,8</sub> -7 <sub>1,7</sub>                      | 105476.475         | 5.29(2)                                   | 0.39(3)                             | 0.023               | 0.009(1)                                   |       |
| HNCS                              | 9 <sub>0,9</sub> -8 <sub>0,8</sub>                      | 105558.074         | 5.28(6)                                   | 0.54(17)                            | 0.006               | 0.003(1)                                   | 5     |
| H <sup>13</sup> CCCN              | 12-11                                                   | 105799.113         | 5.43(13)                                  | 0.60(13)                            | 0.031               | 0.020(1)                                   |       |
| C <sub>3</sub> O                  | 11-10                                                   | 105835.363         | 5.30(21)                                  | 0.45(2)                             | 0.040               | 0.019(1)                                   |       |
| c-HCC <sup>13</sup> CD            | 3 <sub>1,3</sub> -2 <sub>0,2</sub>                      | 106212.420         | 5.15(2)                                   | 0.31(3)                             | 0.017               | 0.005(1)                                   |       |
| c-C <sub>3</sub> HD               | 4 <sub>2,3</sub> -4 <sub>1,4</sub>                      | 106256.108         | 5.29(2)                                   | 0.41(3)                             | 0.028               | 0.012(1)                                   |       |
| C <sub>2</sub> S                  | 8 <sub>9</sub> -7 <sub>8</sub>                          | 106347.726         |                                           |                                     | 0.388               | 0.244(24)                                  | 1     |
| HC <sub>3</sub> N                 | 40-39                                                   | 106498.910         | 5.42(4)                                   | 0.83(8)                             | 0.017               | 0.015(1)                                   |       |
| H <sub>2</sub> C <sub>4</sub>     | 12 <sub>1,12</sub> -11 <sub>1,11</sub>                  | 106726.849         | 5.28(5)                                   | 0.64(7)                             | 0.015               | 0.010(1)                                   |       |
| <sup>34</sup> SO                  | 3 <sub>2</sub> -2 <sub>1</sub>                          | 106743.244         | 4.92(7)                                   | 0.48(5)                             | 0.015               | 0.008(1)                                   |       |
| c-C <sub>3</sub> HD               | 3 <sub>0,3</sub> -2 <sub>0,2</sub>                      | 106811.090         | 5.30(2)                                   | 0.39(2)                             | 0.192               | 0.080(7)                                   |       |
| HCO <sub>2</sub> <sup>+</sup>     | 5 <sub>0,5</sub> -4 <sub>0,4</sub>                      | 106913.545         | 5.29(2)                                   | 0.43(2)                             | 0.091               | 0.042(4)                                   |       |
| CH <sub>3</sub> OH                | 3 <sub>1</sub> -4 <sub>0</sub> A+                       | 107013.831         | 5.28(2)                                   | 0.50(3)                             | -0.051              | -0.027(2)                                  |       |
| H <sub>2</sub> C <sub>4</sub>     | 12 <sub>0,12</sub> -11 <sub>0,11</sub>                  | 107175.007         | 5.16(3)                                   | 0.57(10)                            | 0.011               | 0.007(1)                                   |       |



Table A.1. continued.

| Molecule                                  | Transition                                                 | Frequency<br>(MHz) | $V_{LSR}$<br>(km s <sup>-1</sup> ) | $\Delta v$<br>(km s <sup>-1</sup> ) | $T_A^*$ peak<br>(K) | $\int T_A^* dv$<br>(K km s <sup>-1</sup> ) | Notes |
|-------------------------------------------|------------------------------------------------------------|--------------------|------------------------------------|-------------------------------------|---------------------|--------------------------------------------|-------|
| <sup>13</sup> C <sup>17</sup> O           | 1-0 $F=3/2-5/2$                                            | 107288.423         |                                    |                                     |                     |                                            | 3     |
| <sup>13</sup> C <sup>17</sup> O           | 1-0 $F=7/2-5/2$                                            | 107288.642         | 5.40(7)                            | 1.29(12)                            | 0.014               | 0.019(2)                                   | 3     |
| <sup>13</sup> C <sup>17</sup> O           | 1-0 $F=5/2-5/2$                                            | 107289.669         | 5.54(7)                            | 0.85(18)                            | 0.010               | 0.009(1)                                   |       |
| <i>c</i> -C <sub>3</sub> HD               | 3 <sub>1,3</sub> -2 <sub>0,2</sub>                         | 107423.671         | 5.30(2)                            | 0.40(2)                             | 0.664               | 0.284(28)                                  |       |
| HCCCHO                                    | 5 <sub>1,5</sub> -4 <sub>0,4</sub>                         | 107556.610         | 5.39(6)                            | 0.84(18)                            | 0.009               | 0.008(1)                                   |       |
| H <sub>2</sub> C <sub>4</sub>             | 12 <sub>1,11</sub> -11 <sub>1,10</sub>                     | 107622.954         | 5.29(2)                            | 0.61(8)                             | 0.014               | 0.009(1)                                   |       |
| <i>c</i> -C <sub>3</sub> H <sub>2</sub> O | 8 <sub>0,8</sub> -7 <sub>0,7</sub>                         | 107805.015         | 5.21(4)                            | 0.50(8)                             | 0.010               | 0.006(1)                                   |       |
| <sup>13</sup> CN                          | $N=1-0 J=1/2-1/2 F_1=1-1 F=1-2$                            | 108076.969         | 4.74(4)                            | 0.38(11)                            | 0.009               | 0.004(1)                                   |       |
| <sup>13</sup> CN                          | $N=1-0 J=1/2-1/2 F_1=1-1 F=2-2$                            | 108091.335         | 4.60(3)                            | 0.38(7)                             | 0.013               | 0.005(1)                                   |       |
| <i>trans</i> -HCOOH                       | 5 <sub>1,5</sub> -4 <sub>1,4</sub>                         | 108126.720         | 5.31(2)                            | 0.52(7)                             | 0.018               | 0.010(1)                                   |       |
| <sup>13</sup> CN                          | $N=1-0 J=1/2-1/2 F_1=0-1 F=1-0$                            | 108406.091         | 5.13(5)                            | 0.45(9)                             | 0.010               | 0.005(1)                                   | 2     |
| <sup>13</sup> CN                          | $N=1-0 J=1/2-1/2 F_1=0-1 F=1-1$                            | 108412.862         | 5.18(2)                            | 0.55(3)                             | 0.036               | 0.021(2)                                   | 2     |
| <sup>13</sup> CN                          | $N=1-0 J=1/2-1/2 F_1=0-1 F=1-2$                            | 108426.889         | 5.20(2)                            | 0.55(3)                             | 0.071               | 0.041(4)                                   |       |
| <sup>13</sup> CN                          | $N=1-0 J=1/2-1/2 F_1=1-0 F=0-1$                            | 108631.121         | 5.25(6)                            | 0.31(11)                            | 0.038               | 0.012(4)                                   | 2     |
| <sup>13</sup> CN                          | $N=1-0 J=1/2-1/2 F_1=1-0 F=1-1$                            | 108636.923         | 5.31(2)                            | 0.44(5)                             | 0.106               | 0.050(5)                                   | 2     |
| <sup>13</sup> CN                          | $N=1-0 J=3/2-1/2 F_1=1-1 F=1-0$                            | 108638.212         | 5.40(2)                            | 0.30(9)                             | 0.042               | 0.013(4)                                   | 2     |
| <sup>13</sup> CN                          | $N=1-0 J=3/2-1/2 F_1=1-1 F=2-1$                            | 108643.590         | 5.27(3)                            | 0.52(12)                            | 0.057               | 0.031(6)                                   | 2     |
| <sup>13</sup> CN                          | $N=1-0 J=3/2-1/2 F_1=1-1 F=0-1$                            | 108644.346         | 5.25(7)                            | 0.32(13)                            | 0.030               | 0.010(4)                                   | 2     |
| <sup>13</sup> CN                          | $N=1-0 J=3/2-1/2 F_1=1-1 F=1-1$                            | 108645.064         | 5.67(13)                           | 0.52(24)                            | 0.031               | 0.017(6)                                   |       |
| <sup>13</sup> CN                          | $N=1-0 J=1/2-1/2 F_1=1-0 F=2-1$                            | 108651.297         | 5.32(2)                            | 0.47(3)                             | 0.165               | 0.082(8)                                   | 2     |
| <i>c</i> -C <sub>3</sub> D <sub>2</sub>   | 2 <sub>2,1</sub> -1 <sub>1,0</sub>                         | 108654.564         | 5.34(7)                            | 0.41(17)                            | 0.042               | 0.018(6)                                   |       |
| <sup>13</sup> CN                          | $N=1-0 J=3/2-1/2 F_1=1-1 F=2-2$                            | 108657.646         | 5.34(2)                            | 0.53(6)                             | 0.131               | 0.074(7)                                   |       |
| <sup>13</sup> CN                          | $N=1-0 J=3/2-1/2 F_1=1-1 F=1-2$                            | 108658.948         | 5.24(7)                            | 0.48(16)                            | 0.046               | 0.023(7)                                   |       |
| HC <sup>13</sup> CCN                      | 12-11                                                      | 108710.532         | 5.39(2)                            | 0.52(5)                             | 0.025               | 0.014(1)                                   |       |
| HCC <sup>13</sup> CN                      | 12-11                                                      | 108720.999         | 5.29(2)                            | 0.60(4)                             | 0.032               | 0.020(2)                                   |       |
| <sup>13</sup> CN                          | $N=1-0 J=3/2-1/2 F_1=2-1 F=3-2$                            | 108780.201         | 5.33(13)                           | 0.55(13)                            | 0.210               | 0.122(12)                                  | 2     |
| <sup>13</sup> CN                          | $N=1-0 J=3/2-1/2 F_1=2-1 F=2-1$                            | 108782.374         | 5.31(13)                           | 0.52(13)                            | 0.128               | 0.071(7)                                   |       |
| <sup>13</sup> CN                          | $N=1-0 J=3/2-1/2 F_1=2-1 F=1-0$                            | 108786.982         | 5.28(13)                           | 0.48(13)                            | 0.070               | 0.036(3)                                   | 2     |
| <sup>13</sup> CN                          | $N=1-0 J=3/2-1/2 F_1=2-1 F=1-1$                            | 108793.753         | 5.30(10)                           | 0.54(8)                             | 0.052               | 0.030(4)                                   | 2     |
| <sup>13</sup> CN                          | $N=1-0 J=3/2-1/2 F_1=2-1 F=2-2$                            | 108796.400         | 5.28(2)                            | 0.46(7)                             | 0.059               | 0.029(4)                                   |       |
| C <sub>3</sub> N                          | $N=11-10 J=23/2-21/2$                                      | 108834.254         | 5.08(3)                            | 0.95(10)                            | 0.015               | 0.016(1)                                   |       |
| C <sub>3</sub> N                          | $N=11-10 J=21/2-19/2$                                      | 108853.012         | 5.31(3)                            | 0.54(8)                             | 0.015               | 0.008(1)                                   |       |
| CH <sub>3</sub> OH                        | 1 <sub>-1</sub> -0 <sub>0</sub> <i>E</i>                   | 108893.945         |                                    |                                     | 0.319               | 0.247(24)                                  | 1     |
| CH <sub>3</sub> CCD                       | 7 <sub>1</sub> -6 <sub>1</sub>                             | 109029.216         | 5.26(2)                            | 0.40(4)                             | 0.048               | 0.021(2)                                   |       |
| CH <sub>3</sub> CCD                       | 7 <sub>0</sub> -6 <sub>0</sub>                             | 109031.214         | 5.26(2)                            | 0.40(3)                             | 0.057               | 0.025(2)                                   |       |
| HC <sub>3</sub> N                         | 41-40                                                      | 109160.973         | 5.36(3)                            | 0.99(9)                             | 0.013               | 0.014(1)                                   |       |
| HC <sub>3</sub> N                         | 12-11                                                      | 109173.634         |                                    |                                     | 1.770               | 1.381(138)                                 | 1     |
| <sup>13</sup> CN                          | $N=1-0 J=3/2-1/2 F_1=1-0 F=2-1$                            | 109217.567         | 5.90(4)                            | 0.58(9)                             | 0.012               | 0.007(1)                                   |       |
| <sup>13</sup> CN                          | $N=1-0 J=3/2-1/2 F_1=1-0 F=1-1$                            | 109218.919         | 5.89(3)                            | 0.50(7)                             | 0.012               | 0.006(1)                                   |       |
| SO                                        | 3 <sub>2</sub> -2 <sub>1</sub>                             | 109252.220         |                                    |                                     | 0.445               | 0.226(22)                                  | 1     |
| HCCNC                                     | 11-10                                                      | 109289.095         | 5.28(3)                            | 0.44(3)                             | 0.032               | 0.015(1)                                   |       |
| OCS                                       | 9-8                                                        | 109463.063         | 5.31(2)                            | 0.43(2)                             | 0.072               | 0.033(3)                                   |       |
| C <sup>15</sup> N                         | $N=1-0 J=1/2-1/2 F=1-1$                                    | 109689.610         | 5.18(2)                            | 0.56(5)                             | 0.028               | 0.017(1)                                   |       |
| C <sup>15</sup> N                         | $N=1-0 J=1/2-1/2 F=1-0$                                    | 109708.986         | 5.08(2)                            | 0.55(6)                             | 0.014               | 0.008(1)                                   |       |
| C <sup>15</sup> N                         | $N=1-0 J=1/2-1/2 F=0-1$                                    | 109733.657         | 5.03(2)                            | 0.36(4)                             | 0.018               | 0.007(1)                                   |       |
| DC <sub>3</sub> N                         | 13-12                                                      | 109757.143         | 5.34(8)                            | 0.41(2)                             | 0.057               | 0.025(2)                                   |       |
| C <sup>18</sup> O                         | 1-0                                                        | 109782.173         |                                    |                                     | 3.600               | 3.310(330)                                 | 1     |
| C <sub>3</sub> S                          | 19-18                                                      | 109828.290         | 5.34(3)                            | 0.61(11)                            | 0.014               | 0.009(1)                                   |       |
| HNCO                                      | 5 <sub>0,5</sub> -4 <sub>0,4</sub> $F=4-4$                 | 109904.890         | 5.33(40)                           | 0.36(18)                            | 0.030               | 0.012(5)                                   |       |
| HNCO                                      | 5 <sub>0,5</sub> -4 <sub>0,4</sub> $F=6-5 + F=5-4 + F=4-3$ | 109905.753         | 5.32(2)                            | 0.40(2)                             | 1.313               | 0.555(55)                                  |       |
| HNCO                                      | 5 <sub>0,5</sub> -4 <sub>0,4</sub> $F=5-5$                 | 109906.445         | 5.31(40)                           | 0.41(20)                            | 0.026               | 0.011(5)                                   |       |
| HN <sup>13</sup> CO                       | 5 <sub>0,5</sub> -4 <sub>0,4</sub>                         | 109908.950         | 5.52(40)                           | 0.41(20)                            | 0.033               | 0.014(7)                                   |       |
| C <sup>15</sup> N                         | $N=1-0 J=3/2-1/2 F=1-1$                                    | 110004.092         | 5.15(4)                            | 0.57(9)                             | 0.011               | 0.007(1)                                   |       |
| C <sup>15</sup> N                         | $N=1-0 J=3/2-1/2 F=1-0$                                    | 110023.540         | 5.19(2)                            | 0.42(3)                             | 0.034               | 0.015(1)                                   |       |
| C <sup>15</sup> N                         | $N=1-0 J=3/2-1/2 F=2-1$                                    | 110024.590         | 5.24(2)                            | 0.48(2)                             | 0.070               | 0.036(3)                                   |       |
| NH <sub>2</sub> D                         | 1 <sub>1,1</sub> -1 <sub>0,1</sub> para $F=0-1$            | 110152.092         | 5.43(13)                           | 0.38(13)                            | 0.223               | 0.091(12)                                  |       |
| NH <sub>2</sub> D                         | 1 <sub>1,1</sub> -1 <sub>0,1</sub> para $F=2-1$            | 110153.021         | 5.39(13)                           | 0.41(13)                            | 0.279               | 0.121(12)                                  |       |
| NH <sub>2</sub> D                         | 1 <sub>1,1</sub> -1 <sub>0,1</sub> para $F=2-2 + F=1-1$    | 110153.594         | 5.41(13)                           | 0.51(13)                            | 0.602               | 0.326(32)                                  |       |
| NH <sub>2</sub> D                         | 1 <sub>1,1</sub> -1 <sub>0,1</sub> para $F=1-2$            | 110154.173         | 5.36(13)                           | 0.42(13)                            | 0.261               | 0.116(12)                                  |       |
| NH <sub>2</sub> D                         | 1 <sub>1,1</sub> -1 <sub>0,1</sub> para $F=1-0$            | 110155.028         | 5.32(13)                           | 0.47(13)                            | 0.208               | 0.104(12)                                  |       |
| <sup>13</sup> CO                          | 1-0                                                        | 110201.354         |                                    |                                     | 5.684               | 9.474(947)                                 | 1     |
| <i>c</i> -HCC <sup>13</sup> CH            | 2 <sub>1,1</sub> -1 <sub>1,0</sub>                         | 110306.313         | 5.25(3)                            | 0.42(7)                             | 0.014               | 0.006(1)                                   |       |
| CH <sub>3</sub> CN                        | 6 <sub>1</sub> -5 <sub>1</sub>                             | 110381.372         | 5.34(2)                            | 0.76(7)                             | 0.057               | 0.046(4)                                   |       |
| CH <sub>3</sub> CN                        | 6 <sub>0</sub> -5 <sub>0</sub>                             | 110383.500         | 5.32(2)                            | 0.65(4)                             | 0.072               | 0.050(4)                                   |       |
| D <sub>2</sub> CS                         | 4 <sub>1,4</sub> -3 <sub>1,3</sub>                         | 110756.126         | 5.34(2)                            | 0.38(7)                             | 0.015               | 0.006(1)                                   |       |

Table A.1. continued.

| Molecule                       | Transition                                          | Frequency<br>(MHz) | $V_{\text{LSR}}$<br>(km s <sup>-1</sup> ) | $\Delta v$<br>(km s <sup>-1</sup> ) | $T_A^*$ peak<br>(K) | $\int T_A^* dv$<br>(K km s <sup>-1</sup> ) | Notes |
|--------------------------------|-----------------------------------------------------|--------------------|-------------------------------------------|-------------------------------------|---------------------|--------------------------------------------|-------|
| D <sub>2</sub> CO              | 2 <sub>1,2</sub> -1 <sub>1,1</sub>                  | 110837.830         | 5.39(2)                                   | 0.41(2)                             | 0.124               | 0.054(5)                                   |       |
| <i>trans</i> -HCOOH            | 5 <sub>0,5</sub> -4 <sub>0,4</sub>                  | 111746.785         | 5.30(2)                                   | 0.36(8)                             | 0.022               | 0.008(1)                                   |       |
| CH <sub>3</sub> CHO            | 6 <sub>1,6</sub> -5 <sub>1,5</sub> A                | 112248.716         | 5.37(3)                                   | 0.60(8)                             | 0.027               | 0.017(2)                                   |       |
| CH <sub>3</sub> CHO            | 6 <sub>1,6</sub> -5 <sub>1,5</sub> E                | 112254.508         | 5.20(4)                                   | 0.86(11)                            | 0.025               | 0.023(2)                                   |       |
| C <sup>17</sup> O              | 1-0 F=3/2-5/2                                       | 112358.777         |                                           |                                     |                     |                                            | 1, 3  |
| C <sup>17</sup> O              | 1-0 F=7/2-5/2                                       | 112358.982         |                                           |                                     | 0.754               | 0.798(79)                                  | 1, 3  |
| C <sup>17</sup> O              | 1-0 F=5/2-5/2                                       | 112360.007         |                                           |                                     | 0.485               | 0.407(40)                                  | 1     |
| CH <sub>2</sub> DCCH           | 7 <sub>1,7</sub> -6 <sub>1,6</sub>                  | 112805.469         | 5.26(2)                                   | 0.35(2)                             | 0.094               | 0.035(3)                                   |       |
| HDCCO                          | 6 <sub>0,6</sub> -5 <sub>0,5</sub>                  | 112895.981         | 5.28(3)                                   | 0.35(6)                             | 0.015               | 0.0055(9)                                  |       |
| N <sup>34</sup> S              | <sup>2</sup> Π <sub>1/2</sub> J=5/2-3/2 F=7/2-5/2 e | 113104.650         | 5.28(4)                                   | 0.38(10)                            | 0.015               | 0.0061(9)                                  |       |
| CN                             | N=1-0 J=1/2-1/2 F=1/2-1/2                           | 113123.370         |                                           |                                     | 1.063               | 0.659(65)                                  | 1     |
| CN                             | N=1-0 J=1/2-1/2 F=1/2-3/2                           | 113144.157         |                                           |                                     | 0.809               | 0.990(99)                                  | 1     |
| CN                             | N=1-0 J=1/2-1/2 F=3/2-1/2                           | 113170.492         |                                           |                                     | 0.836               | 1.024(102)                                 | 1     |
| CN                             | N=1-0 J=1/2-1/2 F=3/2-3/2                           | 113191.279         |                                           |                                     | 0.757               | 1.063(106)                                 | 1     |
| CH <sub>2</sub> DCCH           | 7 <sub>2,6</sub> -6 <sub>2,5</sub>                  | 113256.174         | 5.24(13)                                  | 0.34(12)                            | 0.014               | 0.005(2)                                   |       |
| CH <sub>2</sub> DCCH           | 7 <sub>0,7</sub> -6 <sub>0,6</sub>                  | 113258.171         | 5.27(13)                                  | 0.31(12)                            | 0.185               | 0.060(6)                                   |       |
| CH <sub>2</sub> DCCH           | 7 <sub>2,5</sub> -6 <sub>2,4</sub>                  | 113262.423         | 5.26(13)                                  | 0.33(12)                            | 0.023               | 0.008(2)                                   |       |
| C <sub>2</sub> S               | 9 <sub>8</sub> -8 <sub>7</sub>                      | 113410.186         | 5.29(2)                                   | 0.53(2)                             | 0.094               | 0.053(5)                                   |       |
| D <sub>2</sub> CS              | 4 <sub>0,4</sub> -3 <sub>0,3</sub>                  | 113484.714         | 5.37(2)                                   | 0.29(2)                             | 0.078               | 0.024(2)                                   | 1     |
| CN                             | N=1-0 J=3/2-1/2 F=3/2-1/2                           | 113488.120         |                                           |                                     | 0.760               | 1.001(100)                                 | 1     |
| CN                             | N=1-0 J=3/2-1/2 F=5/2-3/2                           | 113490.970         |                                           |                                     | 0.921               | 1.665(166)                                 | 1, 2  |
| CN                             | N=1-0 J=3/2-1/2 F=1/2-1/2                           | 113499.644         |                                           |                                     | 0.718               | 0.890(89)                                  | 1, 2  |
| CN                             | N=1-0 J=3/2-1/2 F=3/2-3/2                           | 113508.907         |                                           |                                     | 0.945               | 1.070(107)                                 | 1     |
| N <sup>34</sup> S              | <sup>2</sup> Π <sub>1/2</sub> J=5/2-3/2 F=5/2-3/2 f | 113514.550         | 5.48(39)                                  | 0.53(26)                            | 0.018               | 0.010(5)                                   |       |
| CN                             | N=1-0 J=3/2-1/2 F=1/2-3/2                           | 113520.432         | 5.38(2)                                   | 0.50(2)                             | 1.062               | 0.566(56)                                  |       |
| CH <sub>2</sub> DCCH           | 7 <sub>1,6</sub> -6 <sub>1,5</sub>                  | 113716.762         | 5.25(2)                                   | 0.31(2)                             | 0.092               | 0.031(3)                                   |       |
| C <sub>4</sub> H               | N=12-11 J=25/2-23/2                                 | 114182.515         | 5.35(2)                                   | 0.52(3)                             | 0.116               | 0.064(6)                                   |       |
| C <sub>4</sub> H               | N=12-11 J=23/2-21/2                                 | 114221.041         | 5.30(2)                                   | 0.54(3)                             | 0.111               | 0.064(6)                                   |       |
| <i>c</i> -HC <sup>13</sup> CCH | 3 <sub>0,3</sub> -2 <sub>1,2</sub>                  | 114381.212         | 5.20(2)                                   | 0.38(4)                             | 0.049               | 0.020(1)                                   |       |
| <i>c</i> -C <sub>3</sub> HD    | 3 <sub>1,2</sub> -2 <sub>2,1</sub>                  | 114647.951         | 5.30(2)                                   | 0.49(2)                             | 0.153               | 0.081(8)                                   |       |
| HCNO                           | 5-4                                                 | 114688.382         | 5.34(2)                                   | 0.29(6)                             | 0.030               | 0.009(1)                                   |       |
| <i>c</i> -HCC <sup>13</sup> CH | 3 <sub>0,3</sub> -2 <sub>1,2</sub>                  | 114897.371         | 5.24(2)                                   | 0.37(2)                             | 0.249               | 0.098(9)                                   |       |
| CH <sub>3</sub> CHO            | 6 <sub>0,6</sub> -5 <sub>0,5</sub> E                | 114940.175         | 5.29(2)                                   | 0.54(10)                            | 0.044               | 0.025(2)                                   |       |
| CH <sub>3</sub> CHO            | 6 <sub>0,6</sub> -5 <sub>0,5</sub> A                | 114959.902         | 5.38(4)                                   | 0.60(7)                             | 0.037               | 0.024(2)                                   |       |
| NS                             | <sup>2</sup> Π <sub>1/2</sub> J=5/2-3/2 F=7/2-5/2 e | 115153.935         | 5.50(13)                                  | 0.42(12)                            | 0.340               | 0.154(15)                                  |       |
| NS                             | <sup>2</sup> Π <sub>1/2</sub> J=5/2-3/2 F=5/2-3/2 e | 115156.812         | 5.51(13)                                  | 0.40(12)                            | 0.250               | 0.107(10)                                  |       |
| NS                             | <sup>2</sup> Π <sub>1/2</sub> J=5/2-3/2 F=3/2-1/2 e | 115162.982         | 5.57(13)                                  | 0.43(12)                            | 0.148               | 0.068(6)                                   |       |
| NS                             | <sup>2</sup> Π <sub>1/2</sub> J=5/2-3/2 F=3/2-3/2 e | 115185.411         | 5.49(3)                                   | 0.42(6)                             | 0.039               | 0.017(2)                                   |       |
| NS                             | <sup>2</sup> Π <sub>1/2</sub> J=5/2-3/2 F=5/2-5/2 e | 115191.288         | 5.44(5)                                   | 0.77(15)                            | 0.031               | 0.025(3)                                   |       |
| CO                             | 1-0                                                 | 115271.202         |                                           |                                     | 10.006              | 44.80(447)                                 | 1     |
| C <sub>3</sub> O               | 12-11                                               | 115455.899         | 5.31(2)                                   | 0.33(5)                             | 0.048               | 0.017(2)                                   |       |
| NS                             | <sup>2</sup> Π <sub>1/2</sub> J=5/2-3/2 F=5/2-5/2 f | 115489.412         | 5.15(2)                                   | 0.24(3)                             | 0.062               | 0.016(2)                                   |       |
| <i>c</i> -HCC <sup>13</sup> CH | 3 <sub>1,3</sub> -2 <sub>0,2</sub>                  | 115524.356         | 5.25(12)                                  | 0.37(2)                             | 0.266               | 0.103(10)                                  |       |
| NS                             | <sup>2</sup> Π <sub>1/2</sub> J=5/2-3/2 F=3/2-3/2 f | 115524.603         | 5.11(2)                                   | 0.38(6)                             | 0.064               | 0.026(2)                                   |       |
| NS                             | <sup>2</sup> Π <sub>1/2</sub> J=5/2-3/2 F=3/2-5/2 f | 115556.253         | 5.07(2)                                   | 0.38(2)                             | 0.346               | 0.140(13)                                  |       |
| NS                             | <sup>2</sup> Π <sub>1/2</sub> J=5/2-3/2 F=5/2-3/2 f | 115570.763         | 5.12(2)                                   | 0.36(3)                             | 0.240               | 0.091(9)                                   |       |
| NS                             | <sup>2</sup> Π <sub>1/2</sub> J=5/2-3/2 F=3/2-1/2 f | 115571.954         | 5.12(3)                                   | 0.36(5)                             | 0.146               | 0.056(7)                                   |       |
| SO <sup>+</sup>                | <sup>2</sup> Π <sub>1/2</sub> J=5/2-3/2 e           | 115804.405         | 5.36(2)                                   | 0.52(4)                             | 0.115               | 0.063(6)                                   |       |

Notes:

- (1) Complex line profile. Impossible to fit to Gaussian function.
- (2) Line affected by frequency switching negative artifact of other line.
- (3) Line blended. Only one component could be fitted.
- (4) Line blended. Several components could be fitted.
- (5) Marginal detection.
- (6) Hyperfine components resolved in astronomical spectrum but not in the laboratory.

**Table A.2.** Line parameters of unidentified lines in L483

| Label   | Frequency<br>(MHz) | $\Delta\nu$<br>(km s <sup>-1</sup> ) | $T_A^*$ peak<br>(K) | $\int T_A^* d\nu$<br>(K km s <sup>-1</sup> ) | Comment                                                              |
|---------|--------------------|--------------------------------------|---------------------|----------------------------------------------|----------------------------------------------------------------------|
| U82619  | 82618.59(2)        | 0.33(8)                              | 0.010               | 0.004(1)                                     |                                                                      |
| U82667  | 82666.72(2)        | 0.47(7)                              | 0.014               | 0.007(1)                                     |                                                                      |
| U87998  | 87998.01(2)        | 0.58(9)                              | 0.009               | 0.006(1)                                     |                                                                      |
| U88306  | 88306.51(2)        | 0.43(9)                              | 0.012               | 0.005(1)                                     |                                                                      |
| U91341  | 91340.84(2)        | 0.50(13)                             | 0.006               | 0.003(1)                                     | U91341, U91343, and U91344 are probably hyperfine components of the  |
| U91343  | 91342.70(2)        | 0.53(5)                              | 0.016               | 0.009(1)                                     | same rotational transition.                                          |
| U91344  | 91344.01(2)        | 0.66(10)                             | 0.009               | 0.006(1)                                     | Seen in B1-b at 91344.0 MHz (Lefloch et al. 2018).                   |
| U92373  | 92372.79(2)        | 0.27(2)                              | 0.031               | 0.009(1)                                     | Nearby U line seen in L1448-R2 at 92374.0 MHz (Lefloch et al. 2018). |
| U92780  | 92779.67(2)        | 0.31(7)                              | 0.017               | 0.005(1)                                     |                                                                      |
| U103023 | 103023.22(2)       | 0.39(7)                              | 0.010               | 0.004(1)                                     |                                                                      |
| U103402 | 103402.20(2)       | 0.40(3)                              | 0.022               | 0.009(1)                                     | Seen in Sgr B2(N) at 103402 MHz (Halfen et al. 2006).                |
| U104713 | 104712.84(3)       | 0.48(10)                             | 0.015               | 0.008(1)                                     |                                                                      |
| U107298 | 107298.39(2)       | 0.32(6)                              | 0.012               | 0.004(1)                                     |                                                                      |
| U107765 | 107765.04(2)       | 0.33(4)                              | 0.028               | 0.010(1)                                     |                                                                      |
| U108241 | 108241.47(2)       | 0.51(9)                              | 0.016               | 0.008(1)                                     |                                                                      |
| U109610 | 109610.17(3)       | 0.74(16)                             | 0.013               | 0.010(1)                                     |                                                                      |
| U112622 | 112621.87(3)       | 0.53(8)                              | 0.011               | 0.006(1)                                     |                                                                      |
| U114380 | 114379.97(3)       | 0.48(16)                             | 0.025               | 0.013(3)                                     |                                                                      |

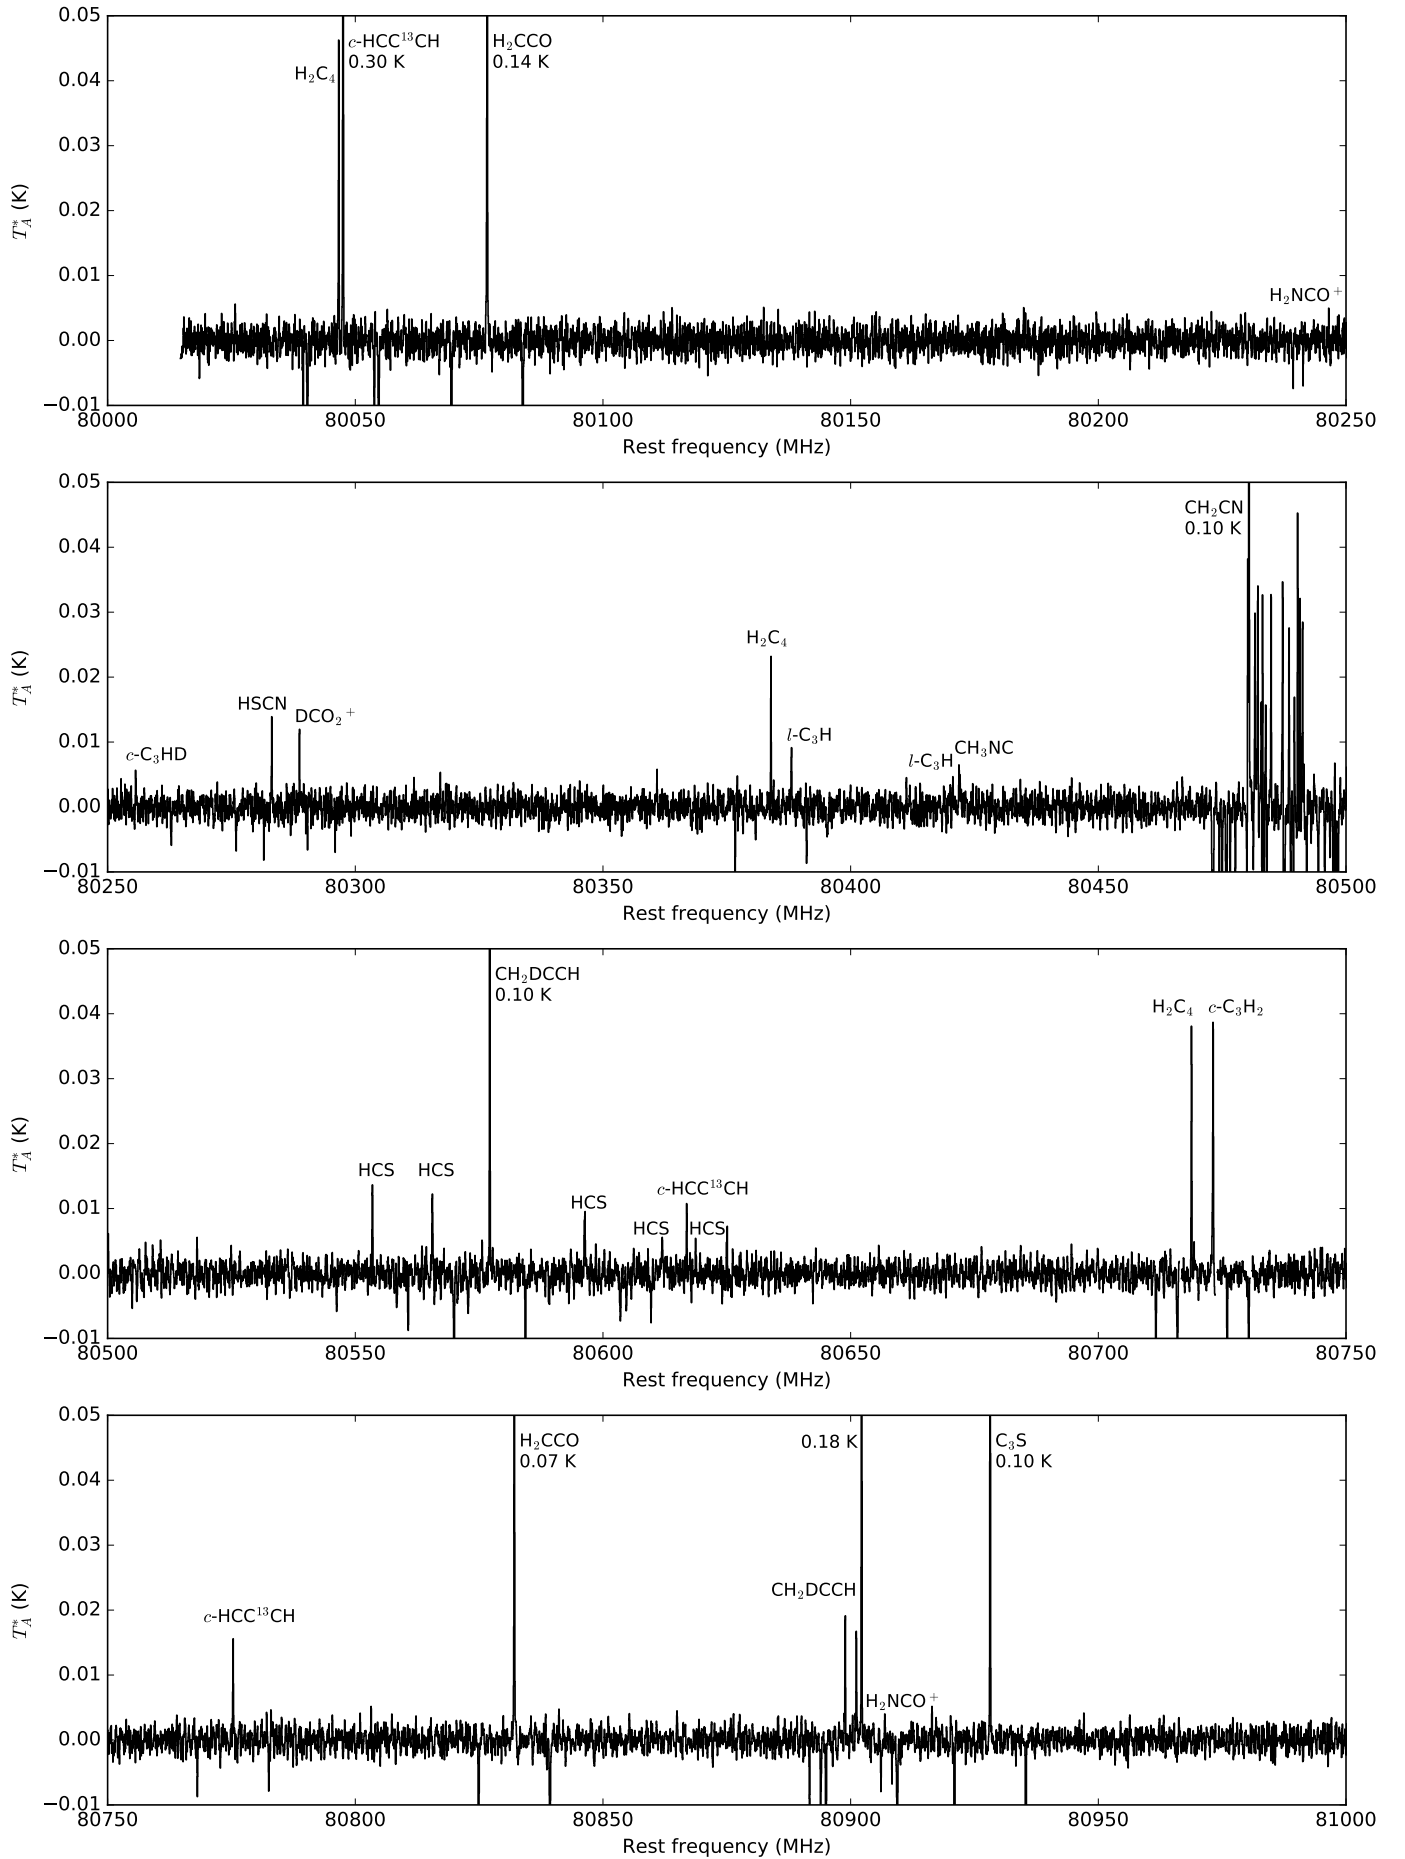

Fig. A.1. The 80-116 GHz spectrum of L483.

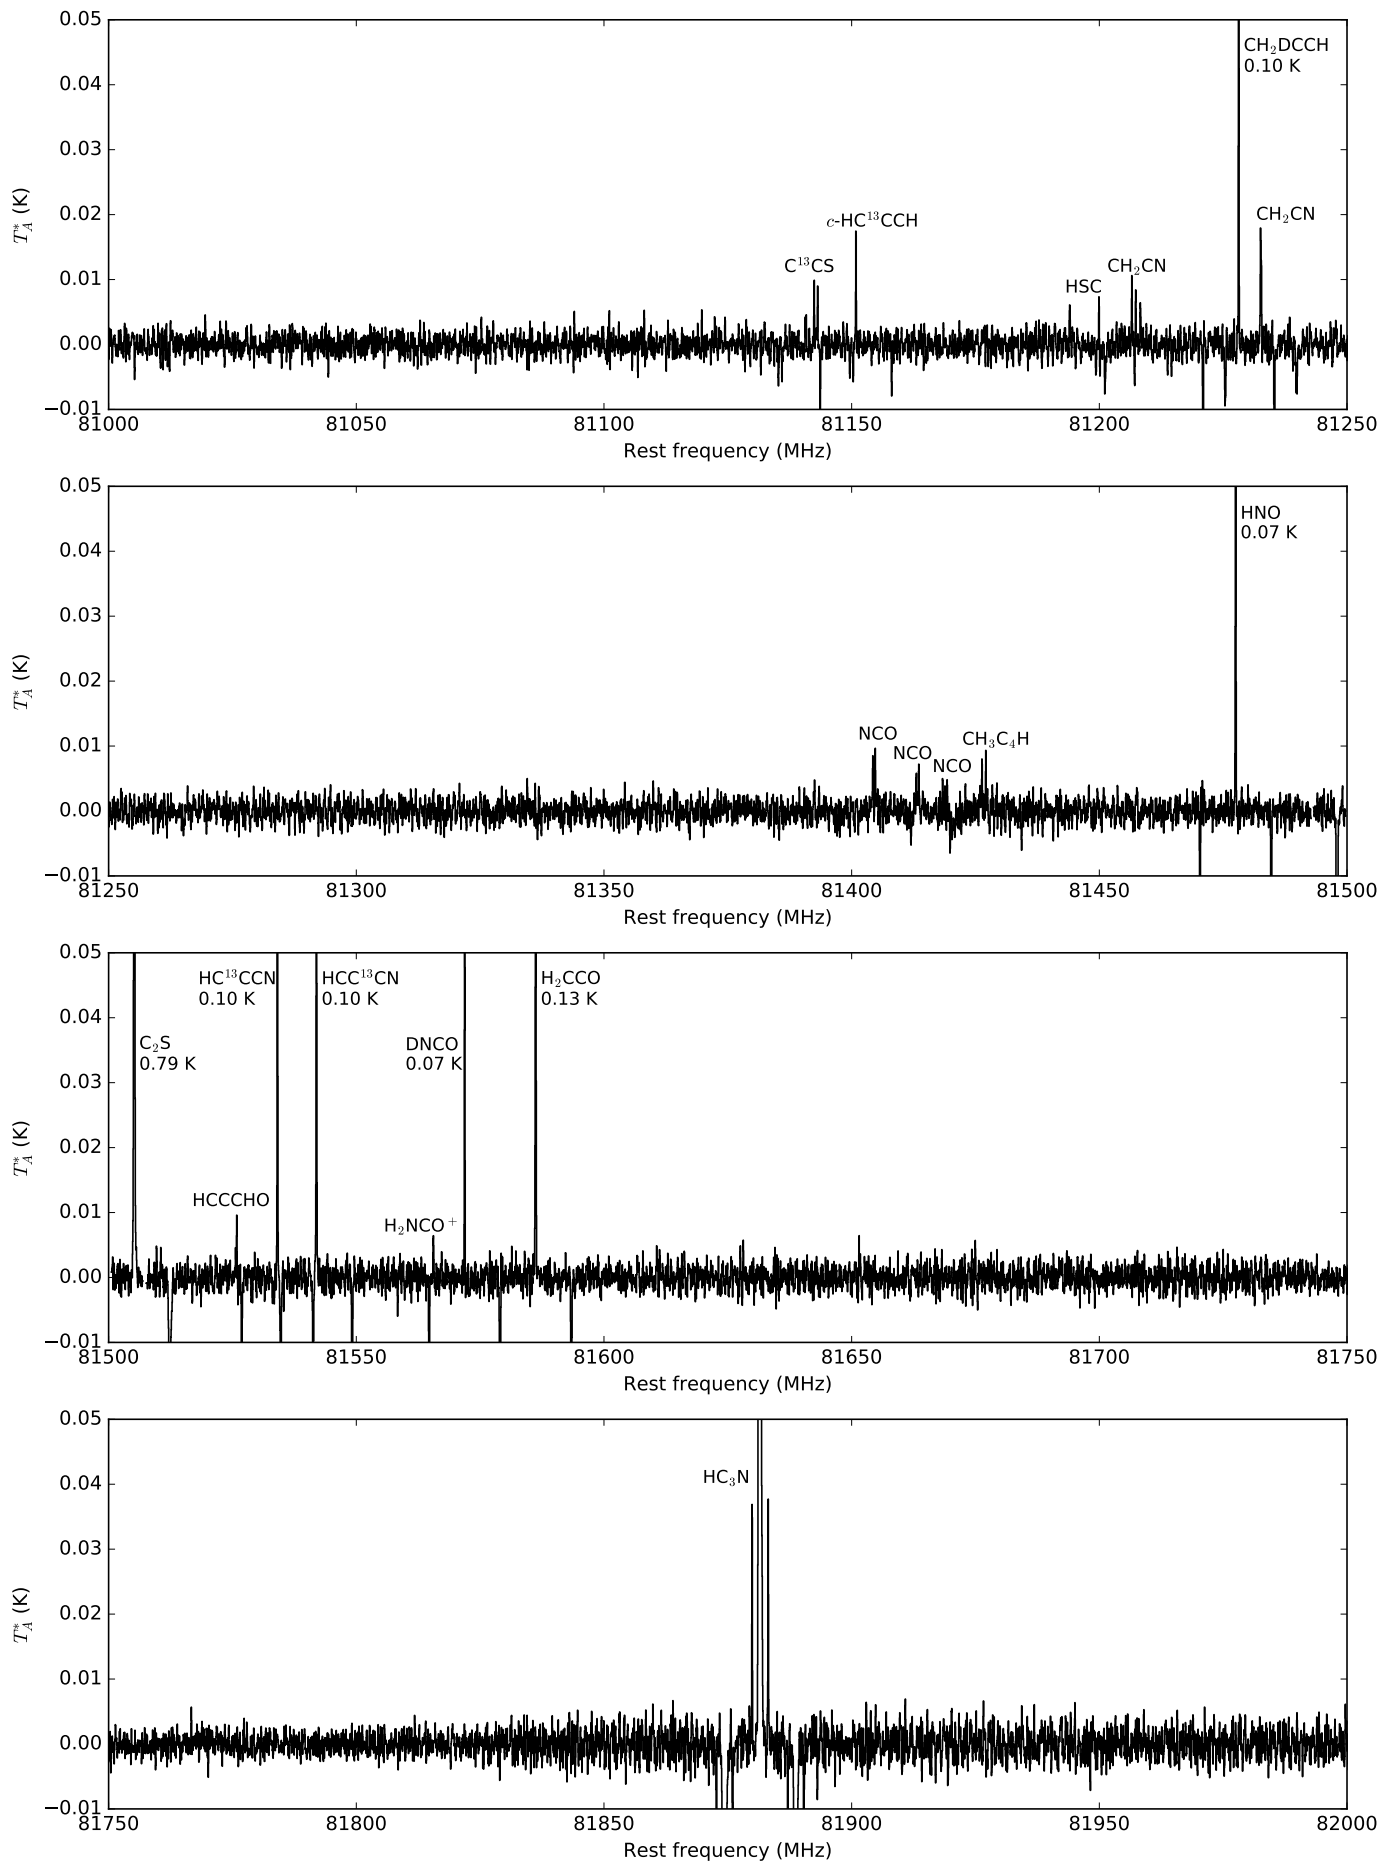

**Fig. A.1.** Continued  
Article number, page 36 of 70

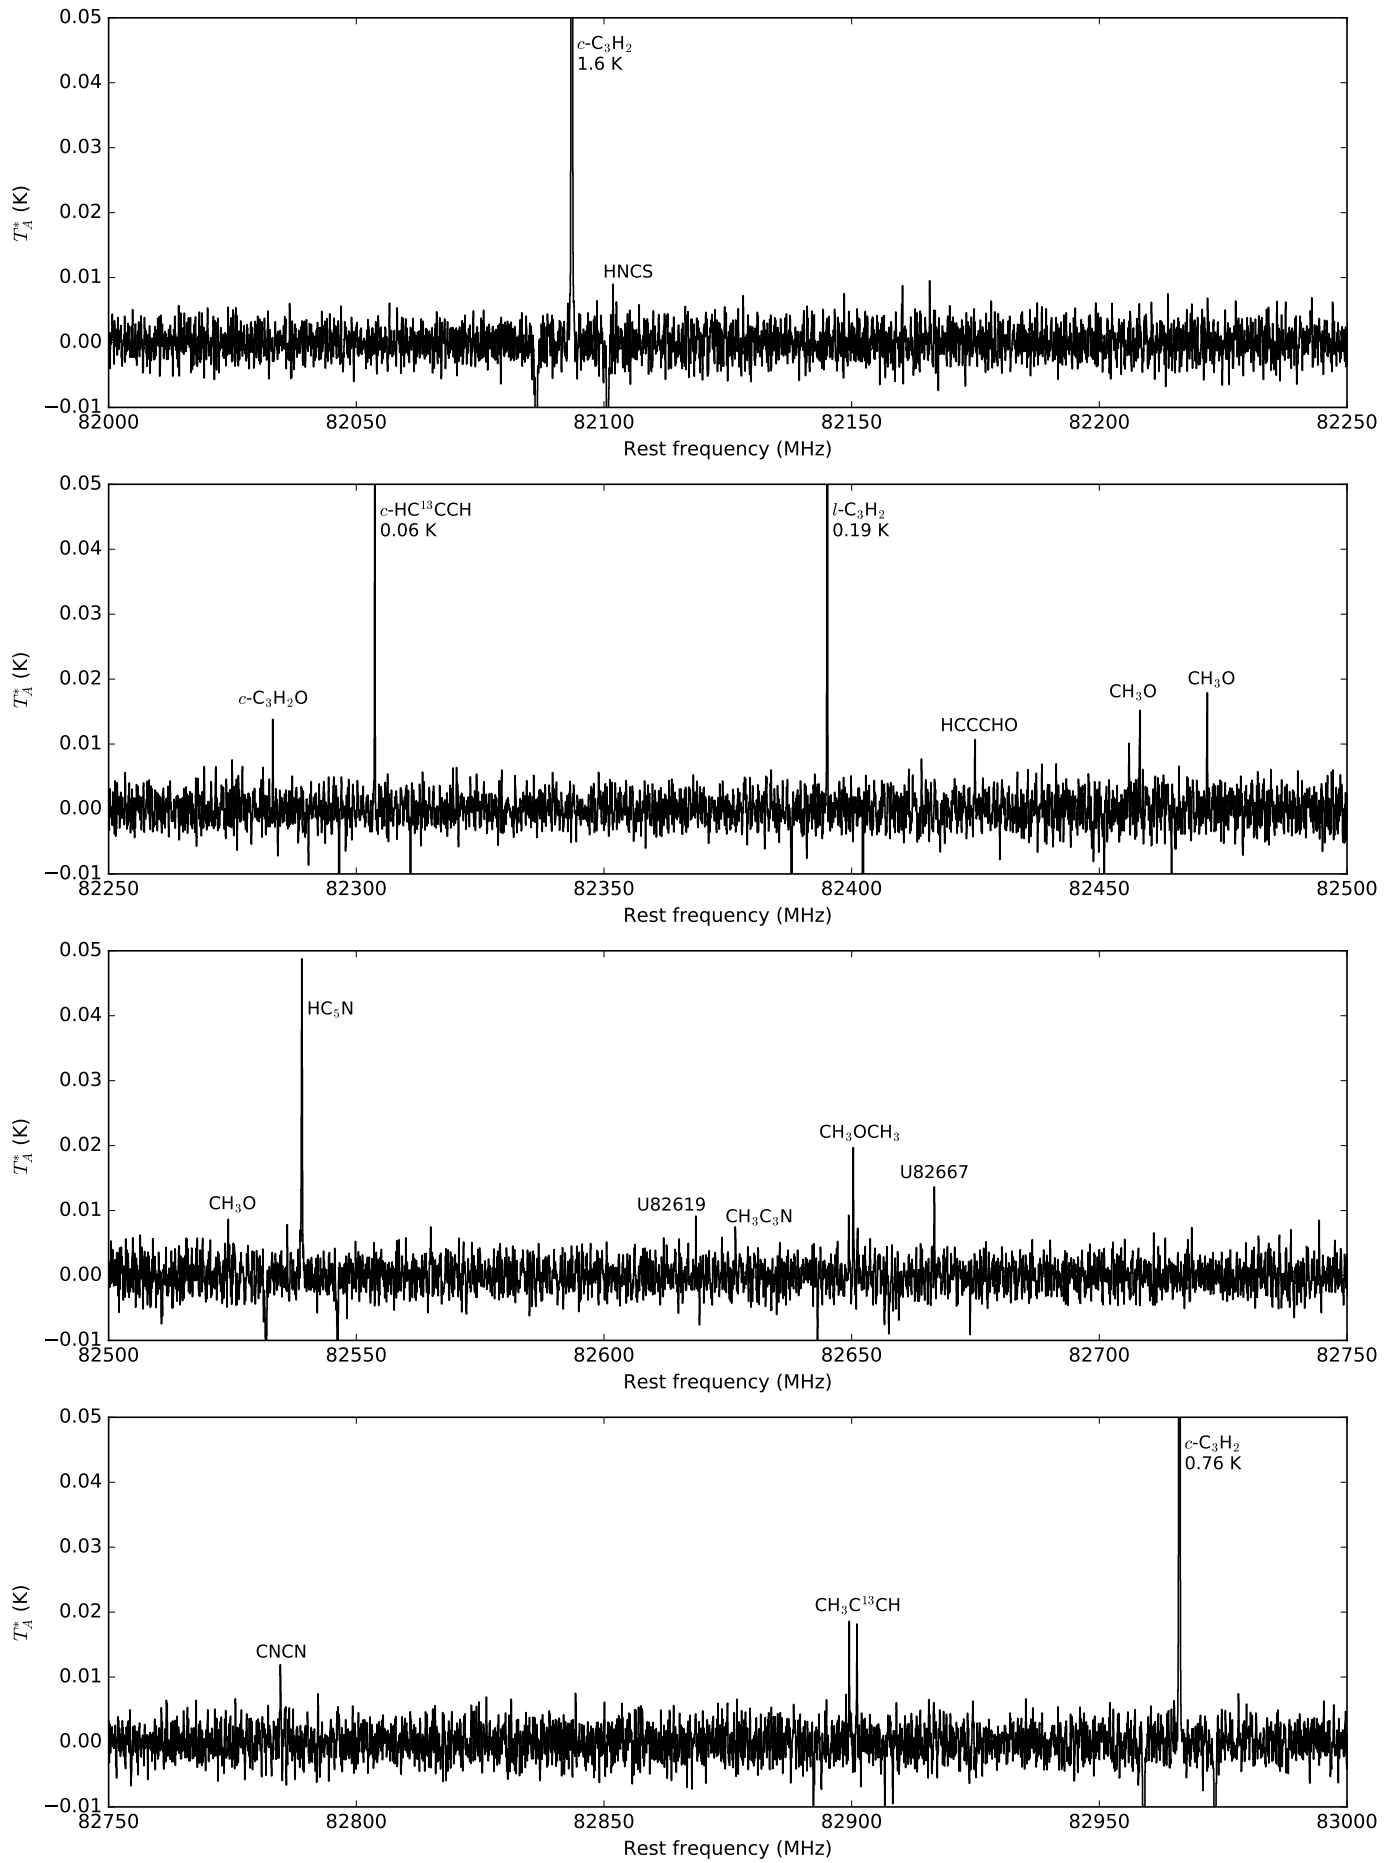

Fig. A.1. Continued

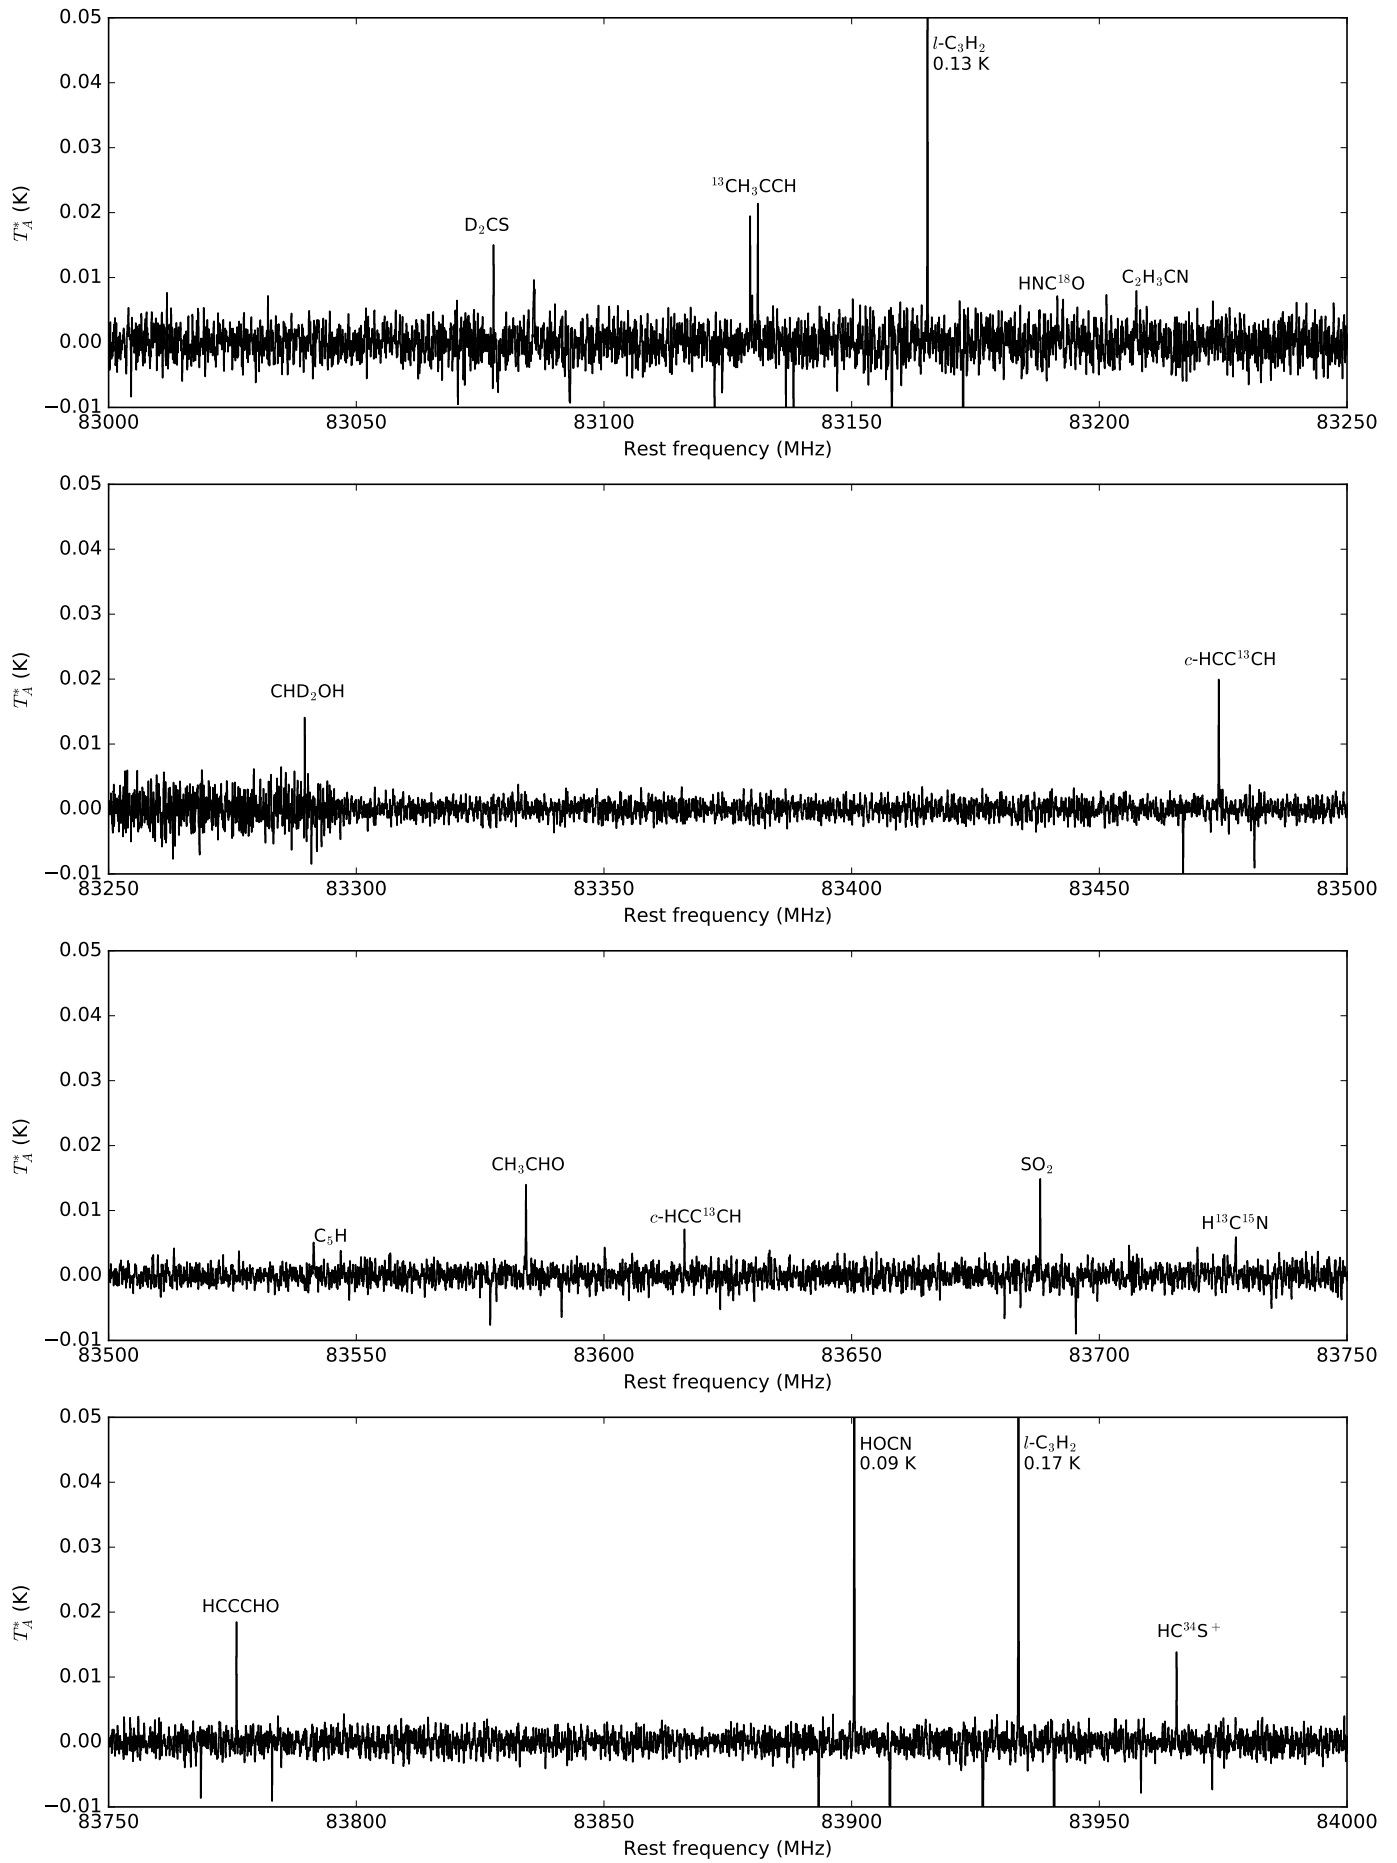

**Fig. A.1.** Continued  
Article number, page 38 of 70

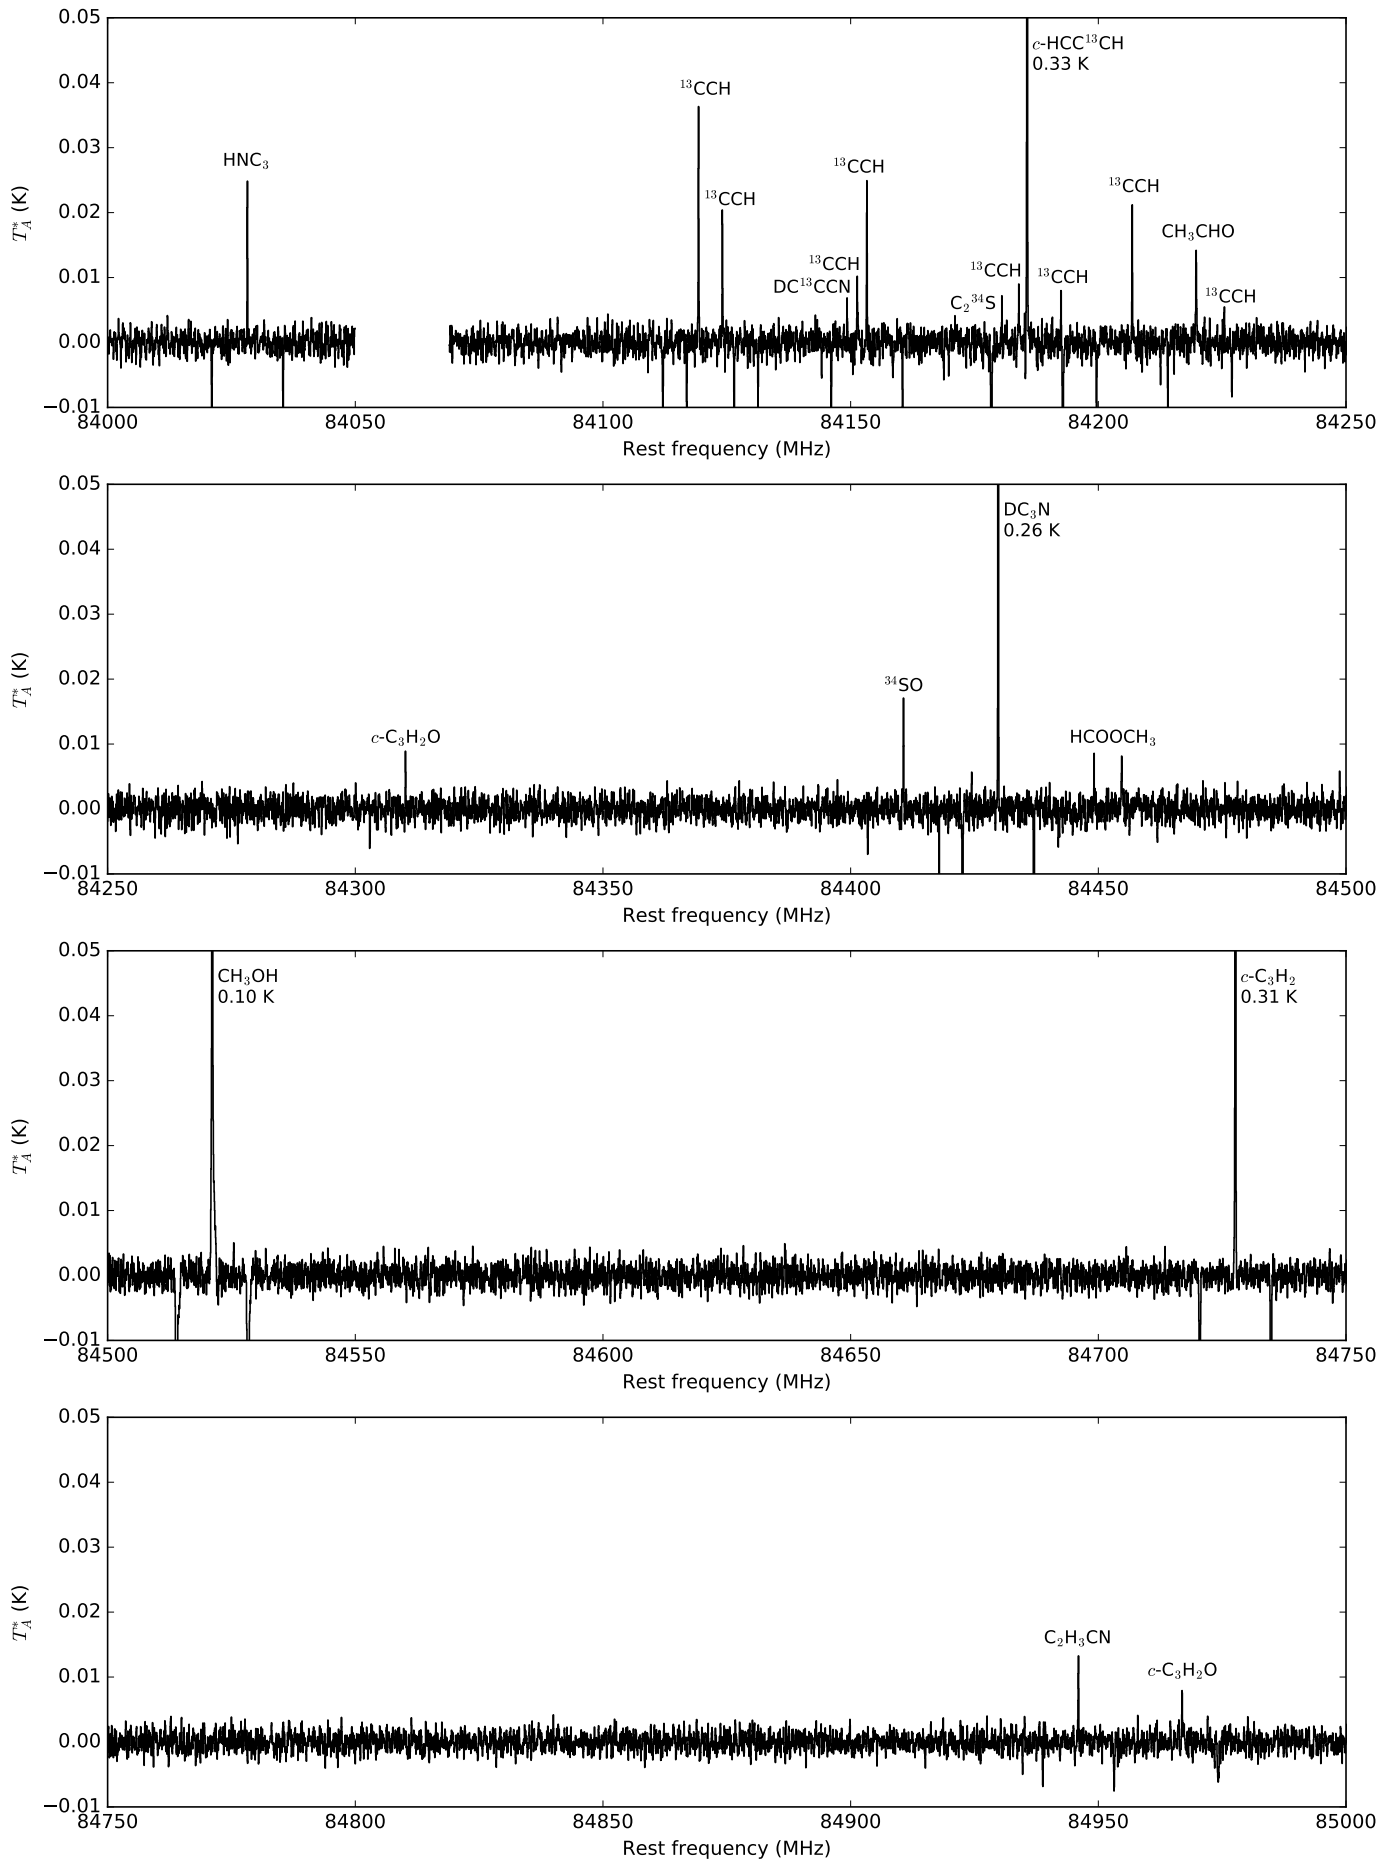

Fig. A.1. Continued



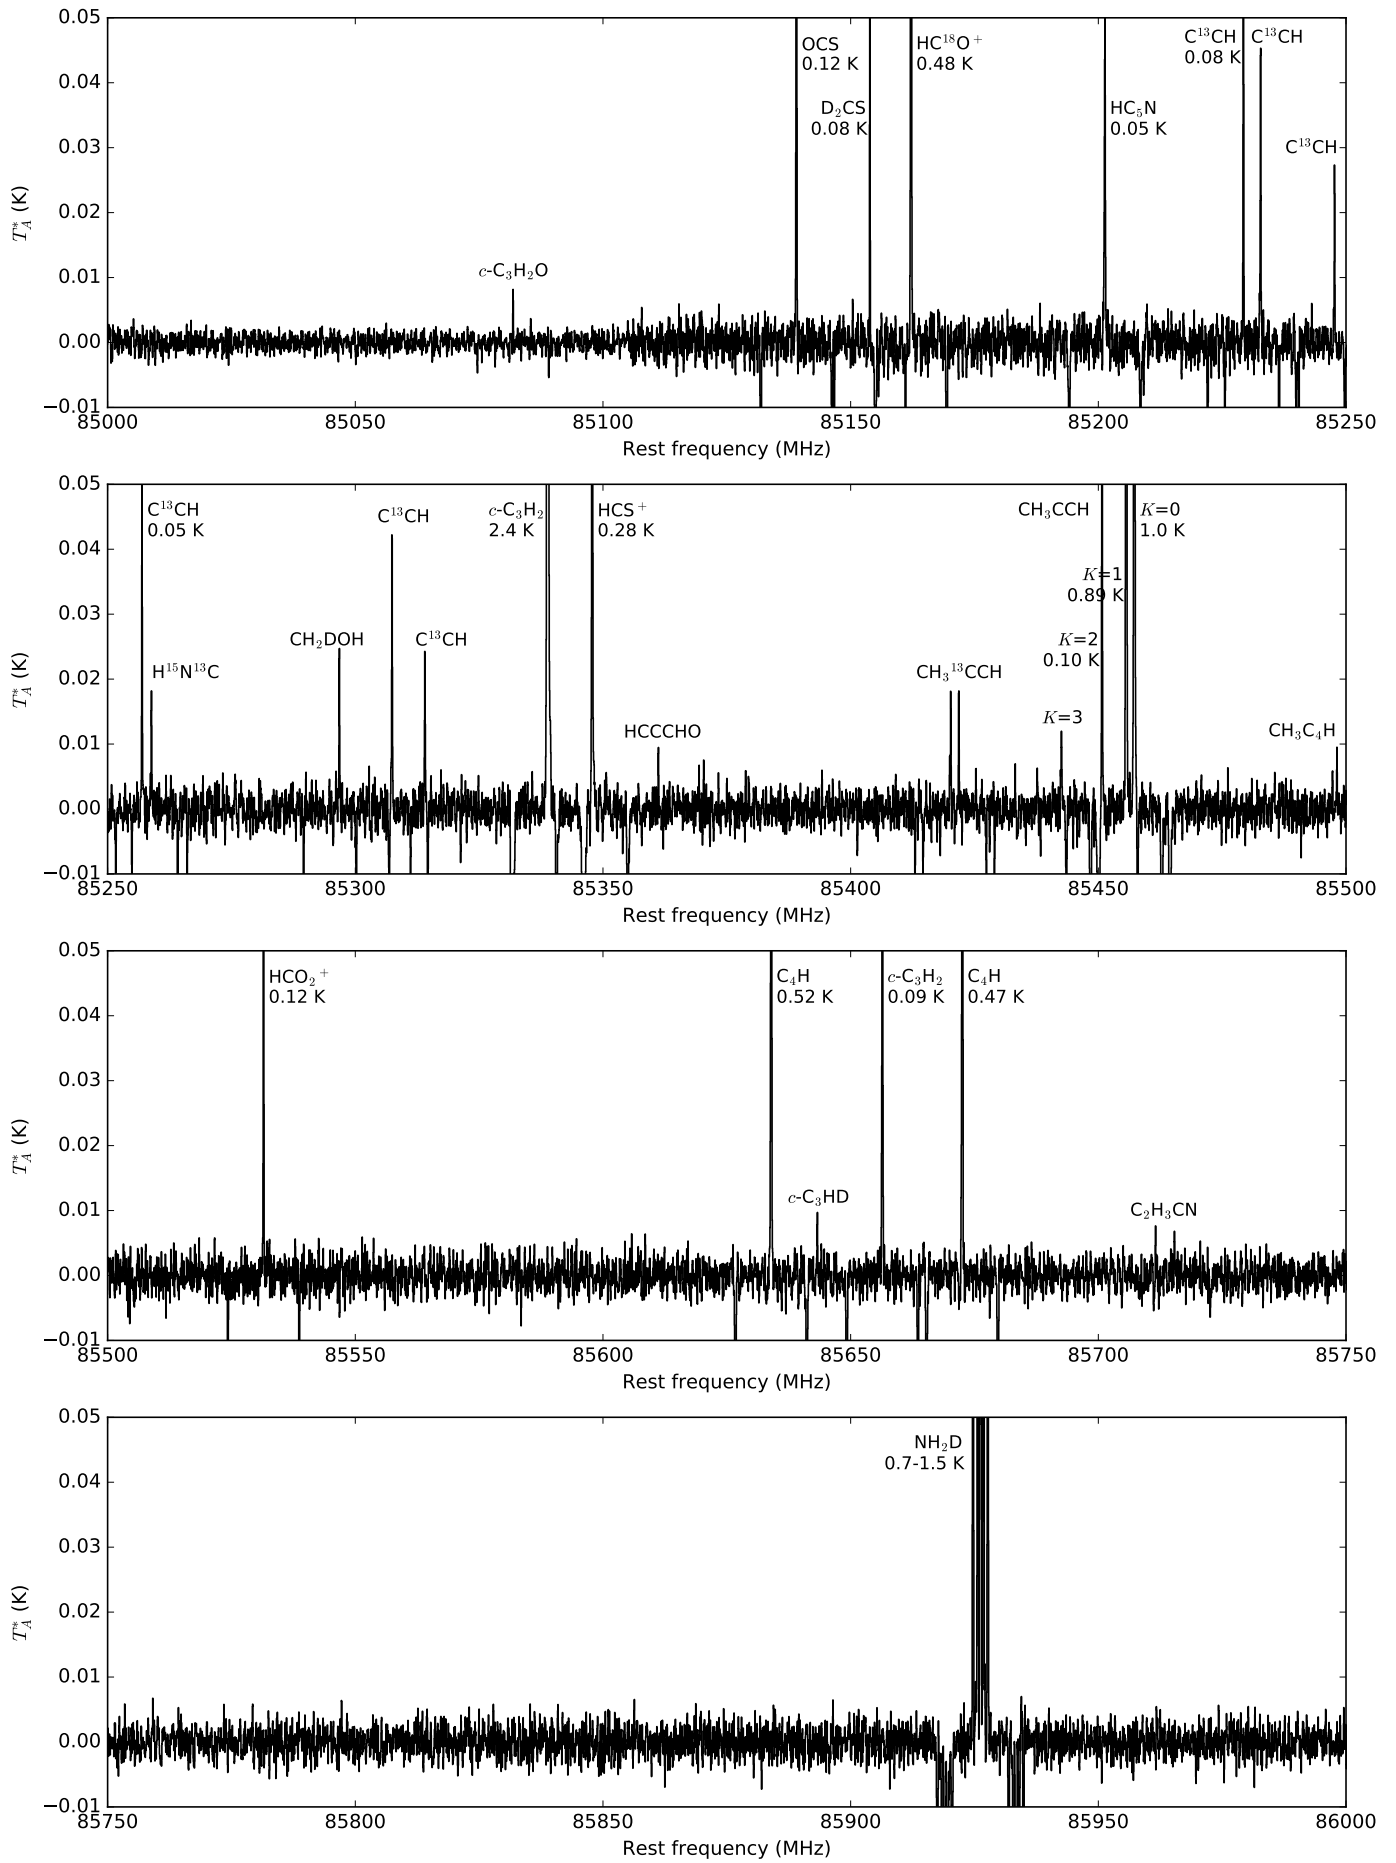

**Fig. A.1.** Continued  
Article number, page 40 of 70

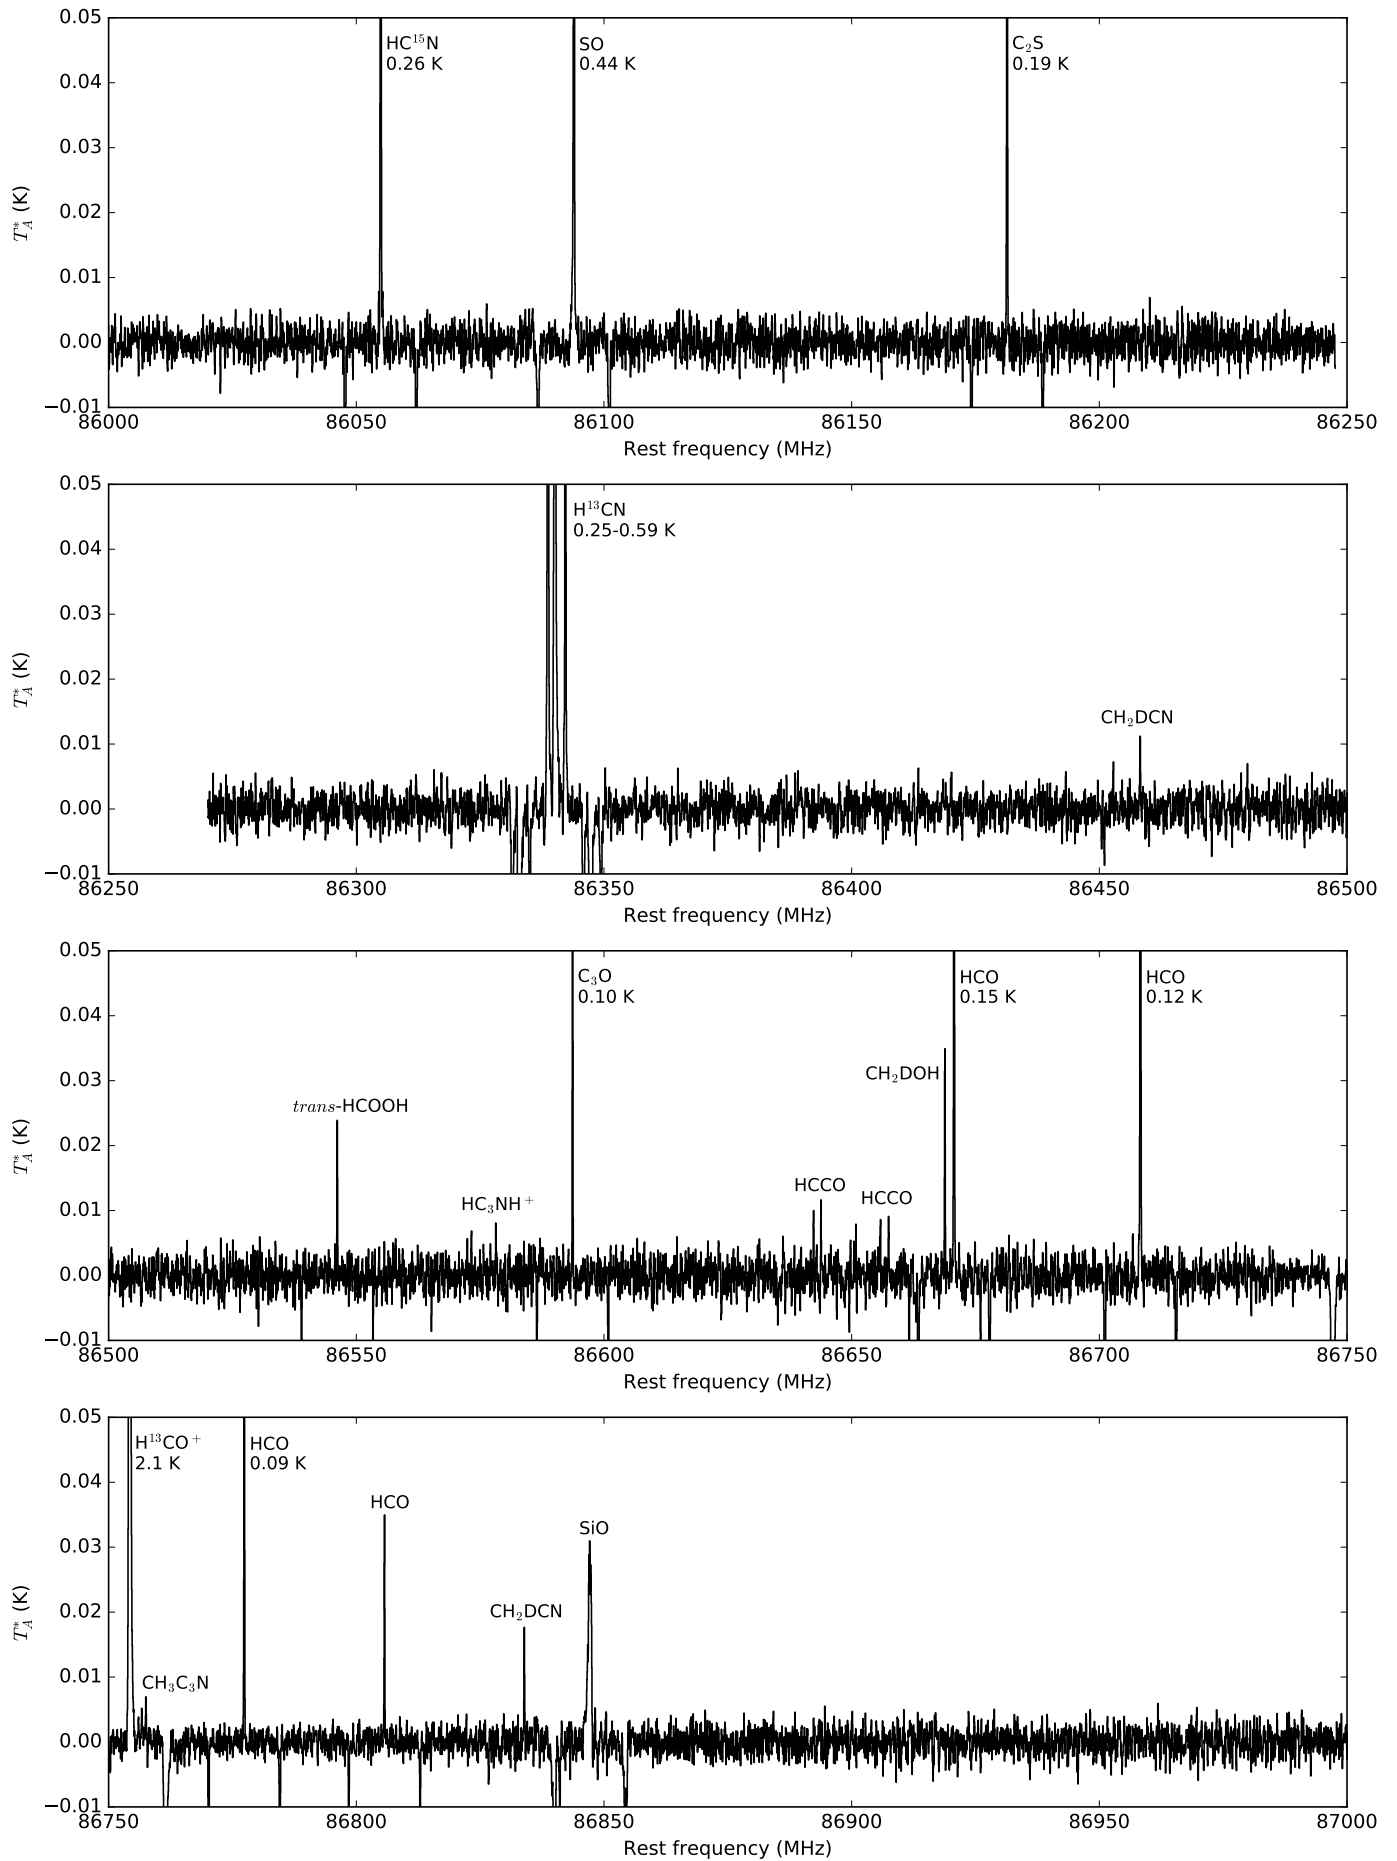

Fig. A.1. Continued

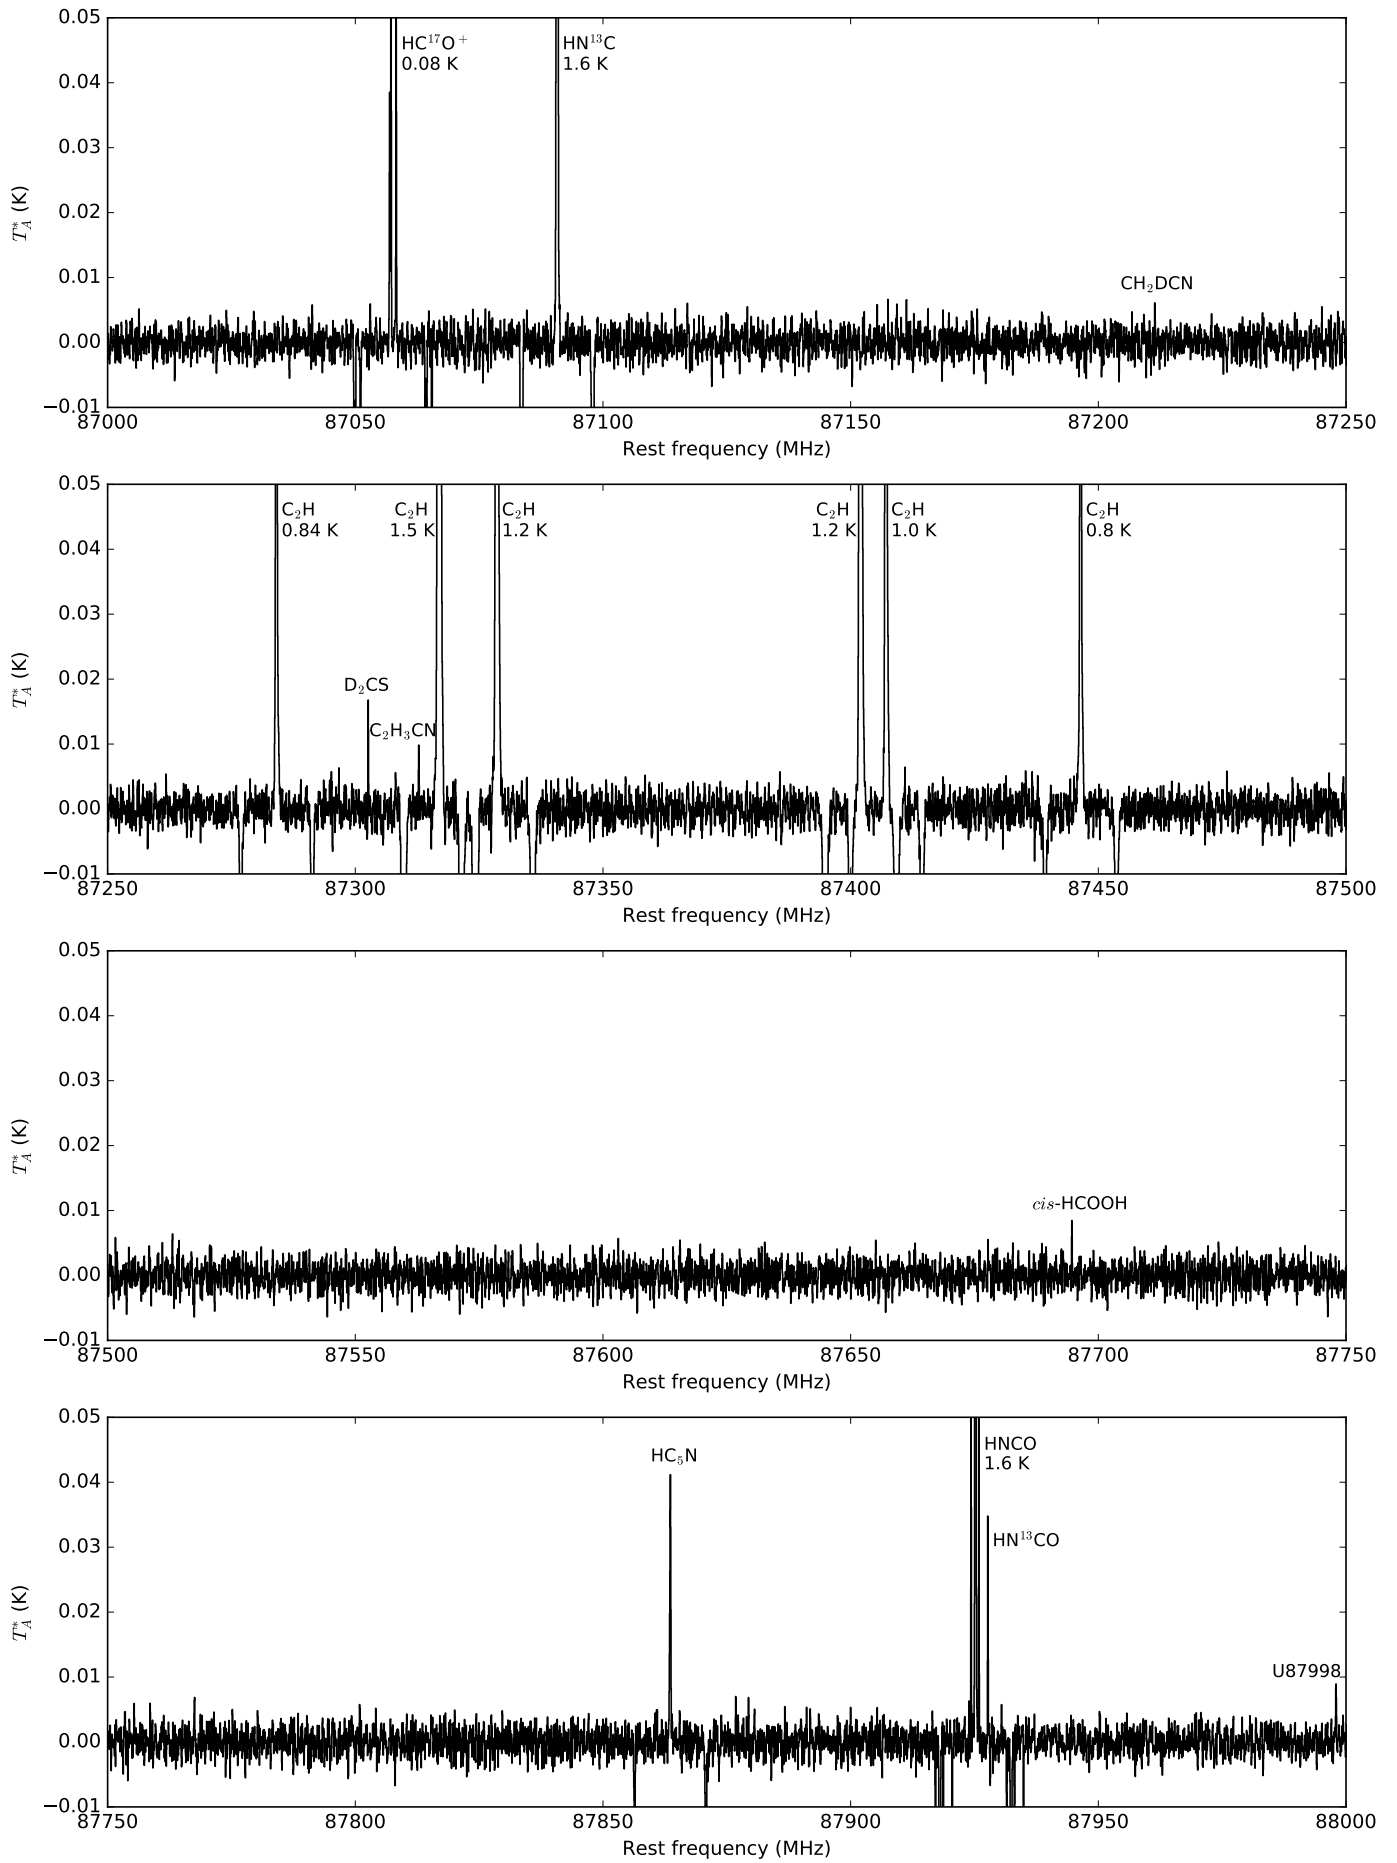

**Fig. A.1.** Continued  
Article number, page 42 of 70

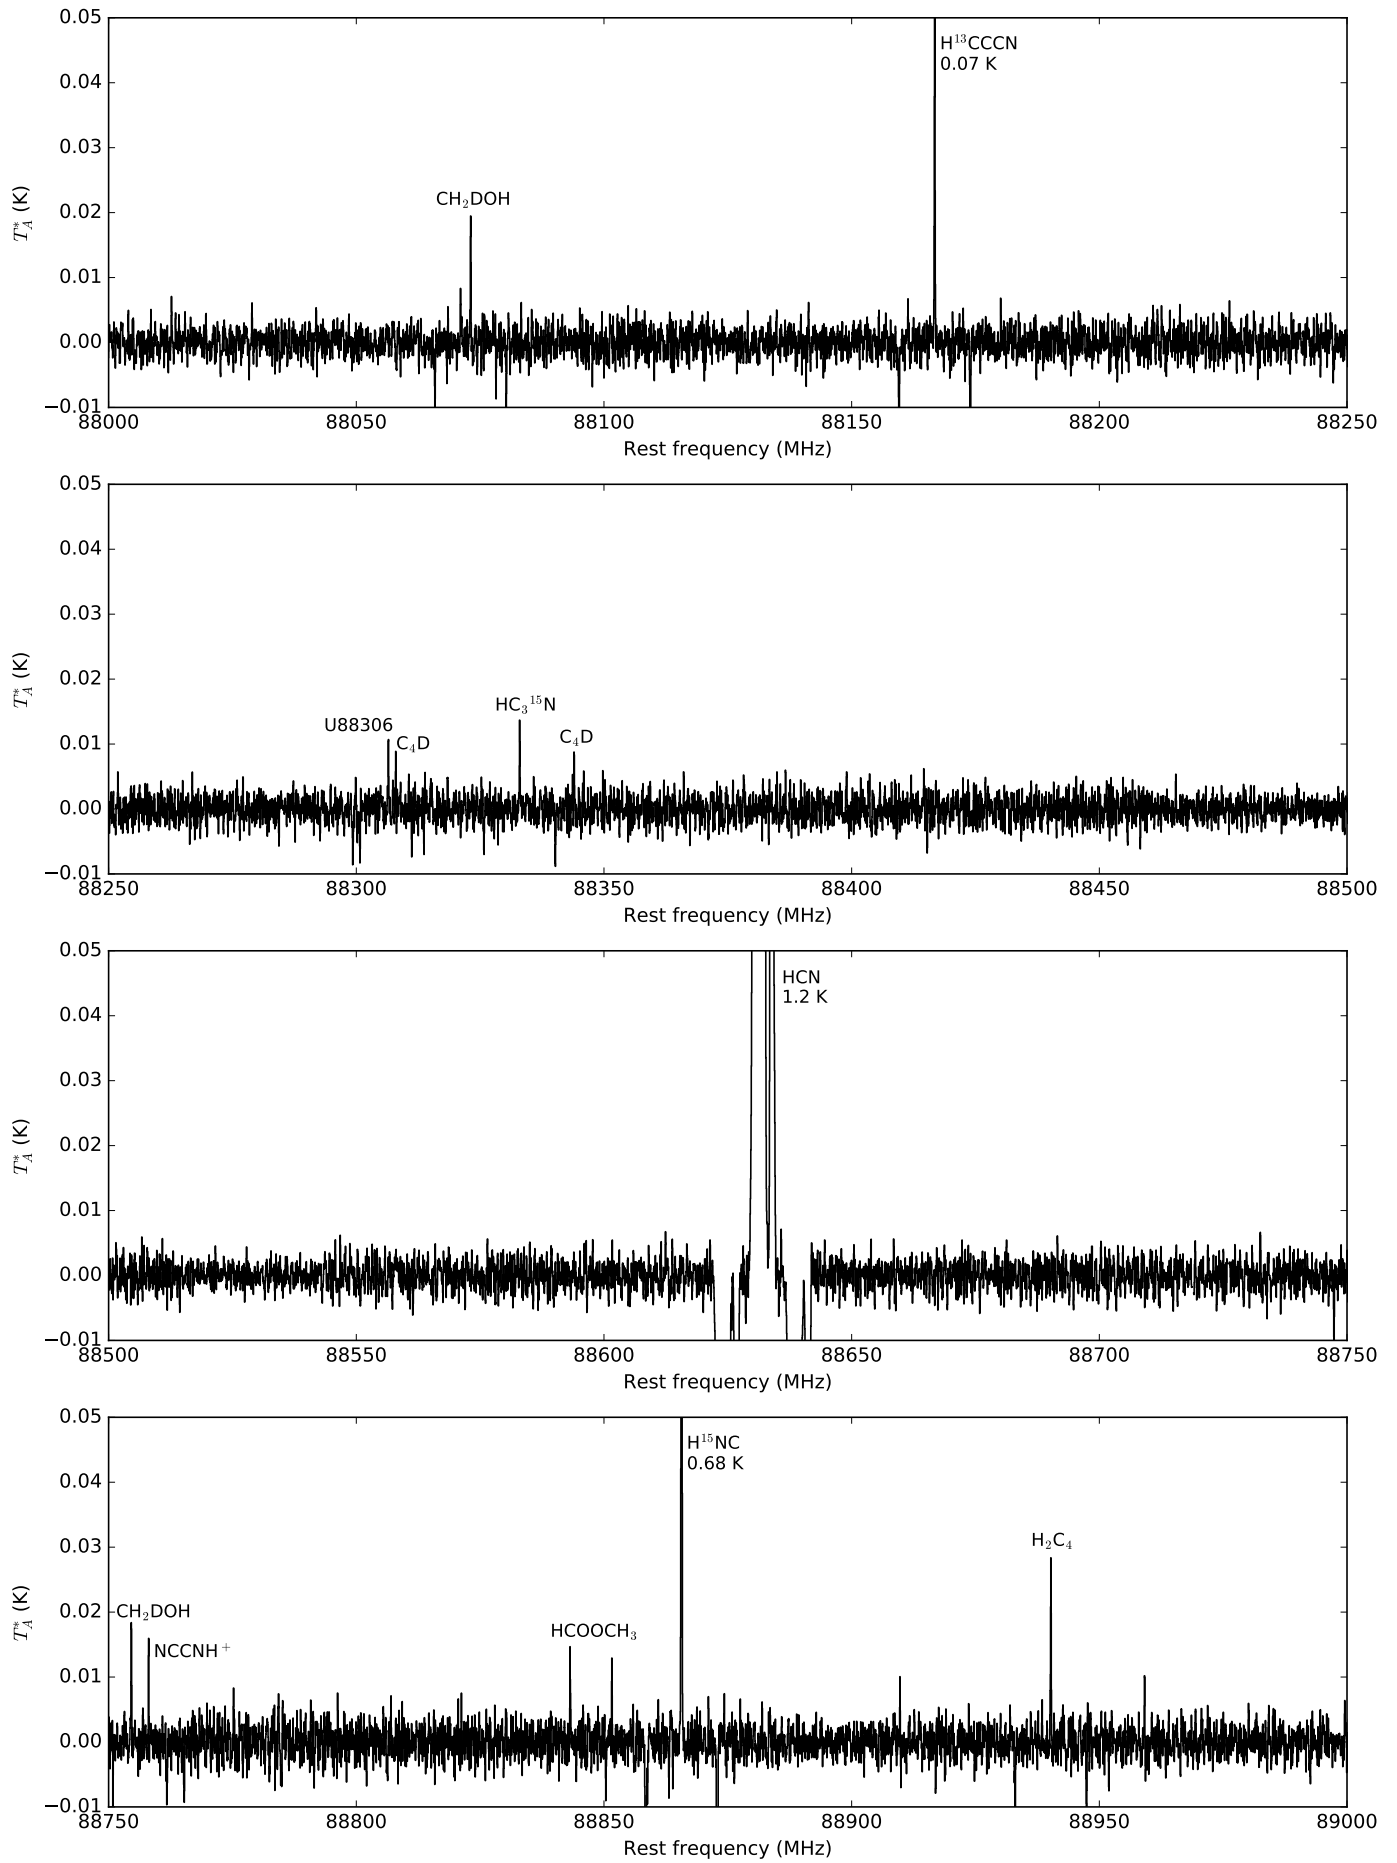

Fig. A.1. Continued

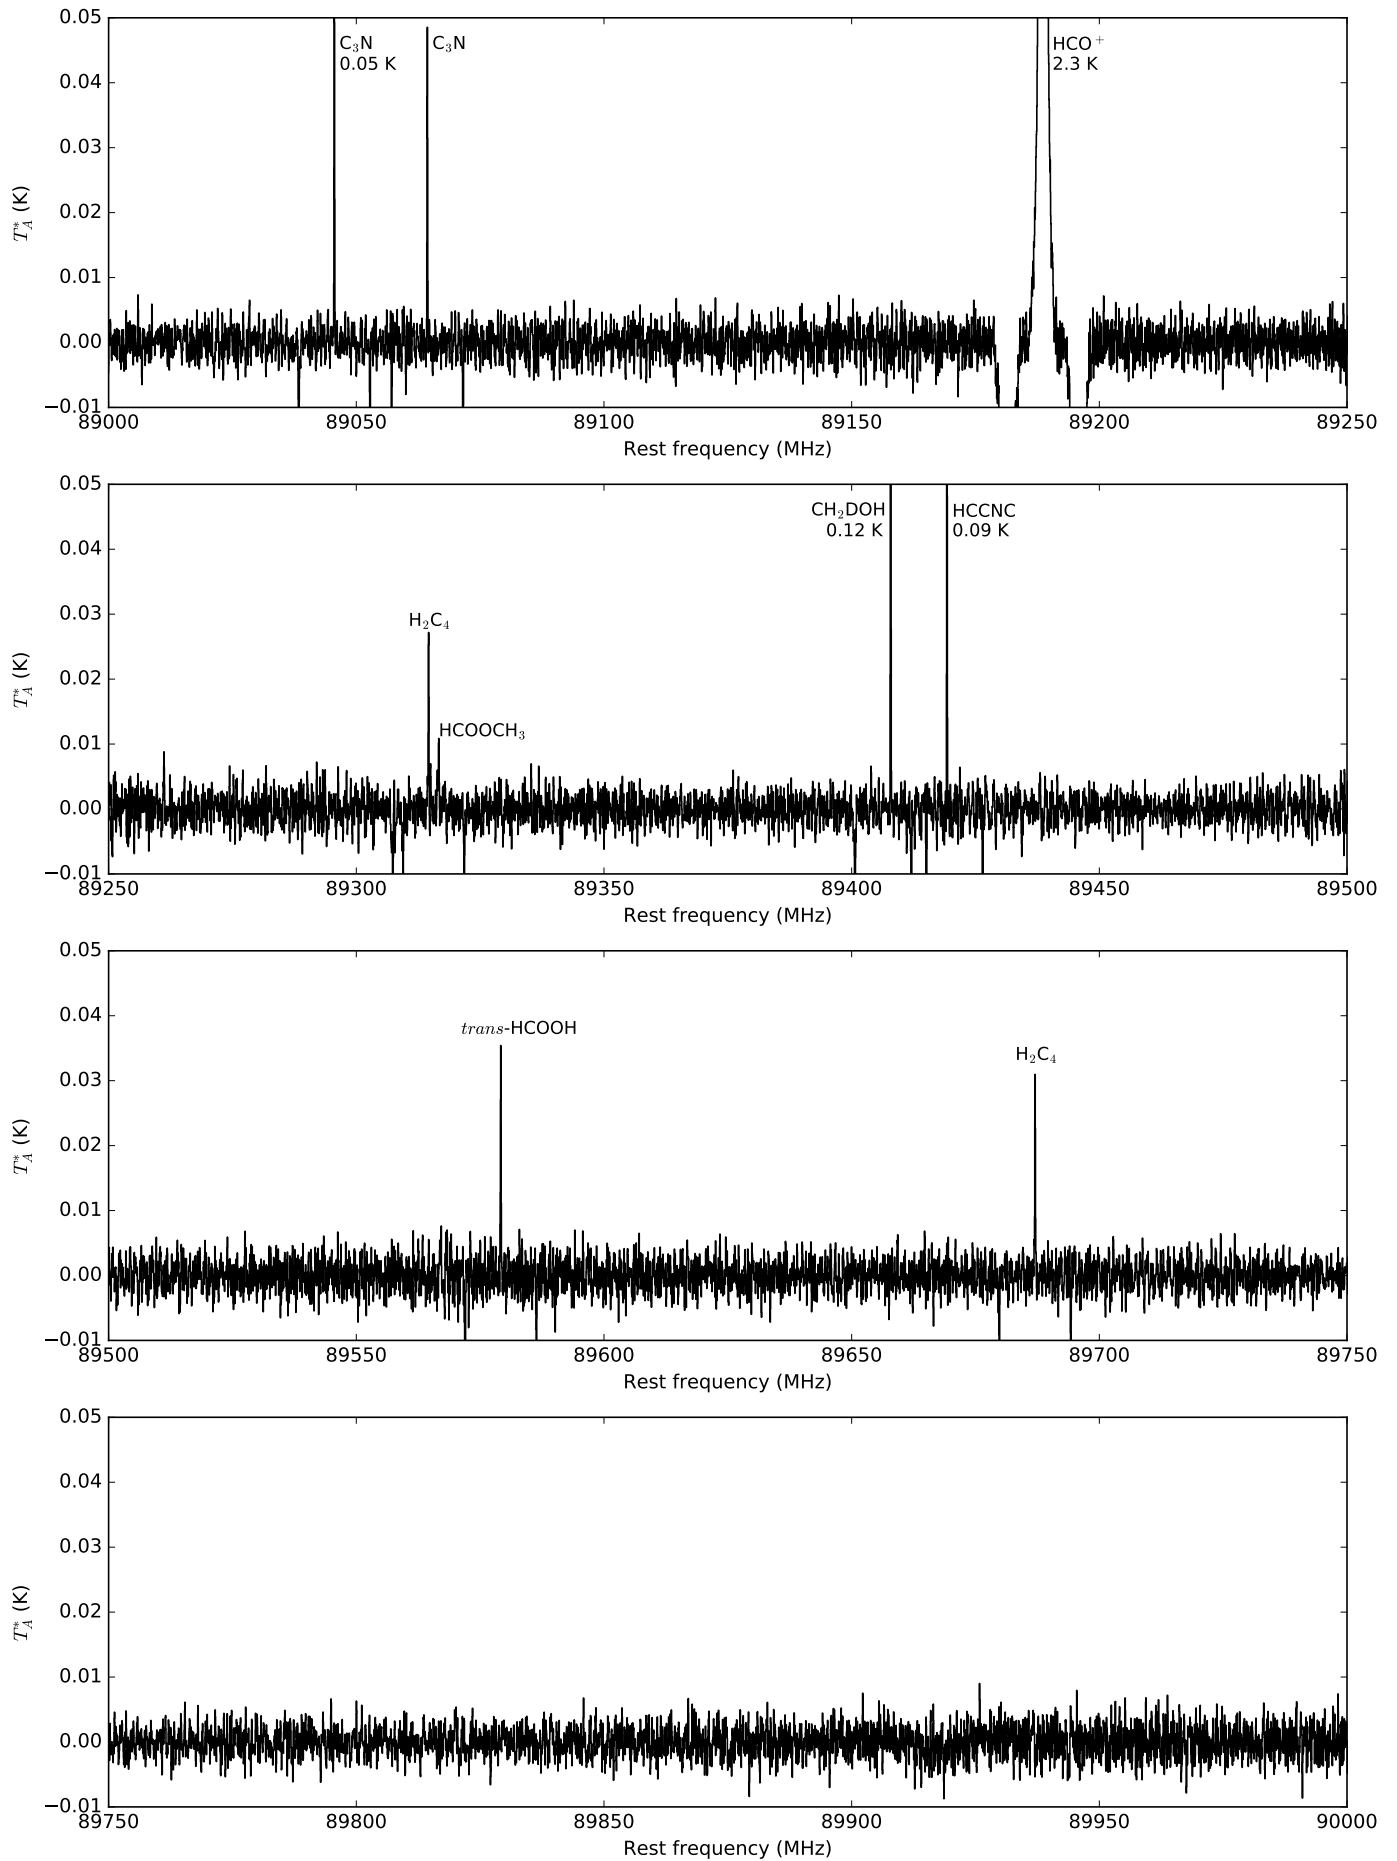

**Fig. A.1.** Continued  
Article number, page 44 of 70

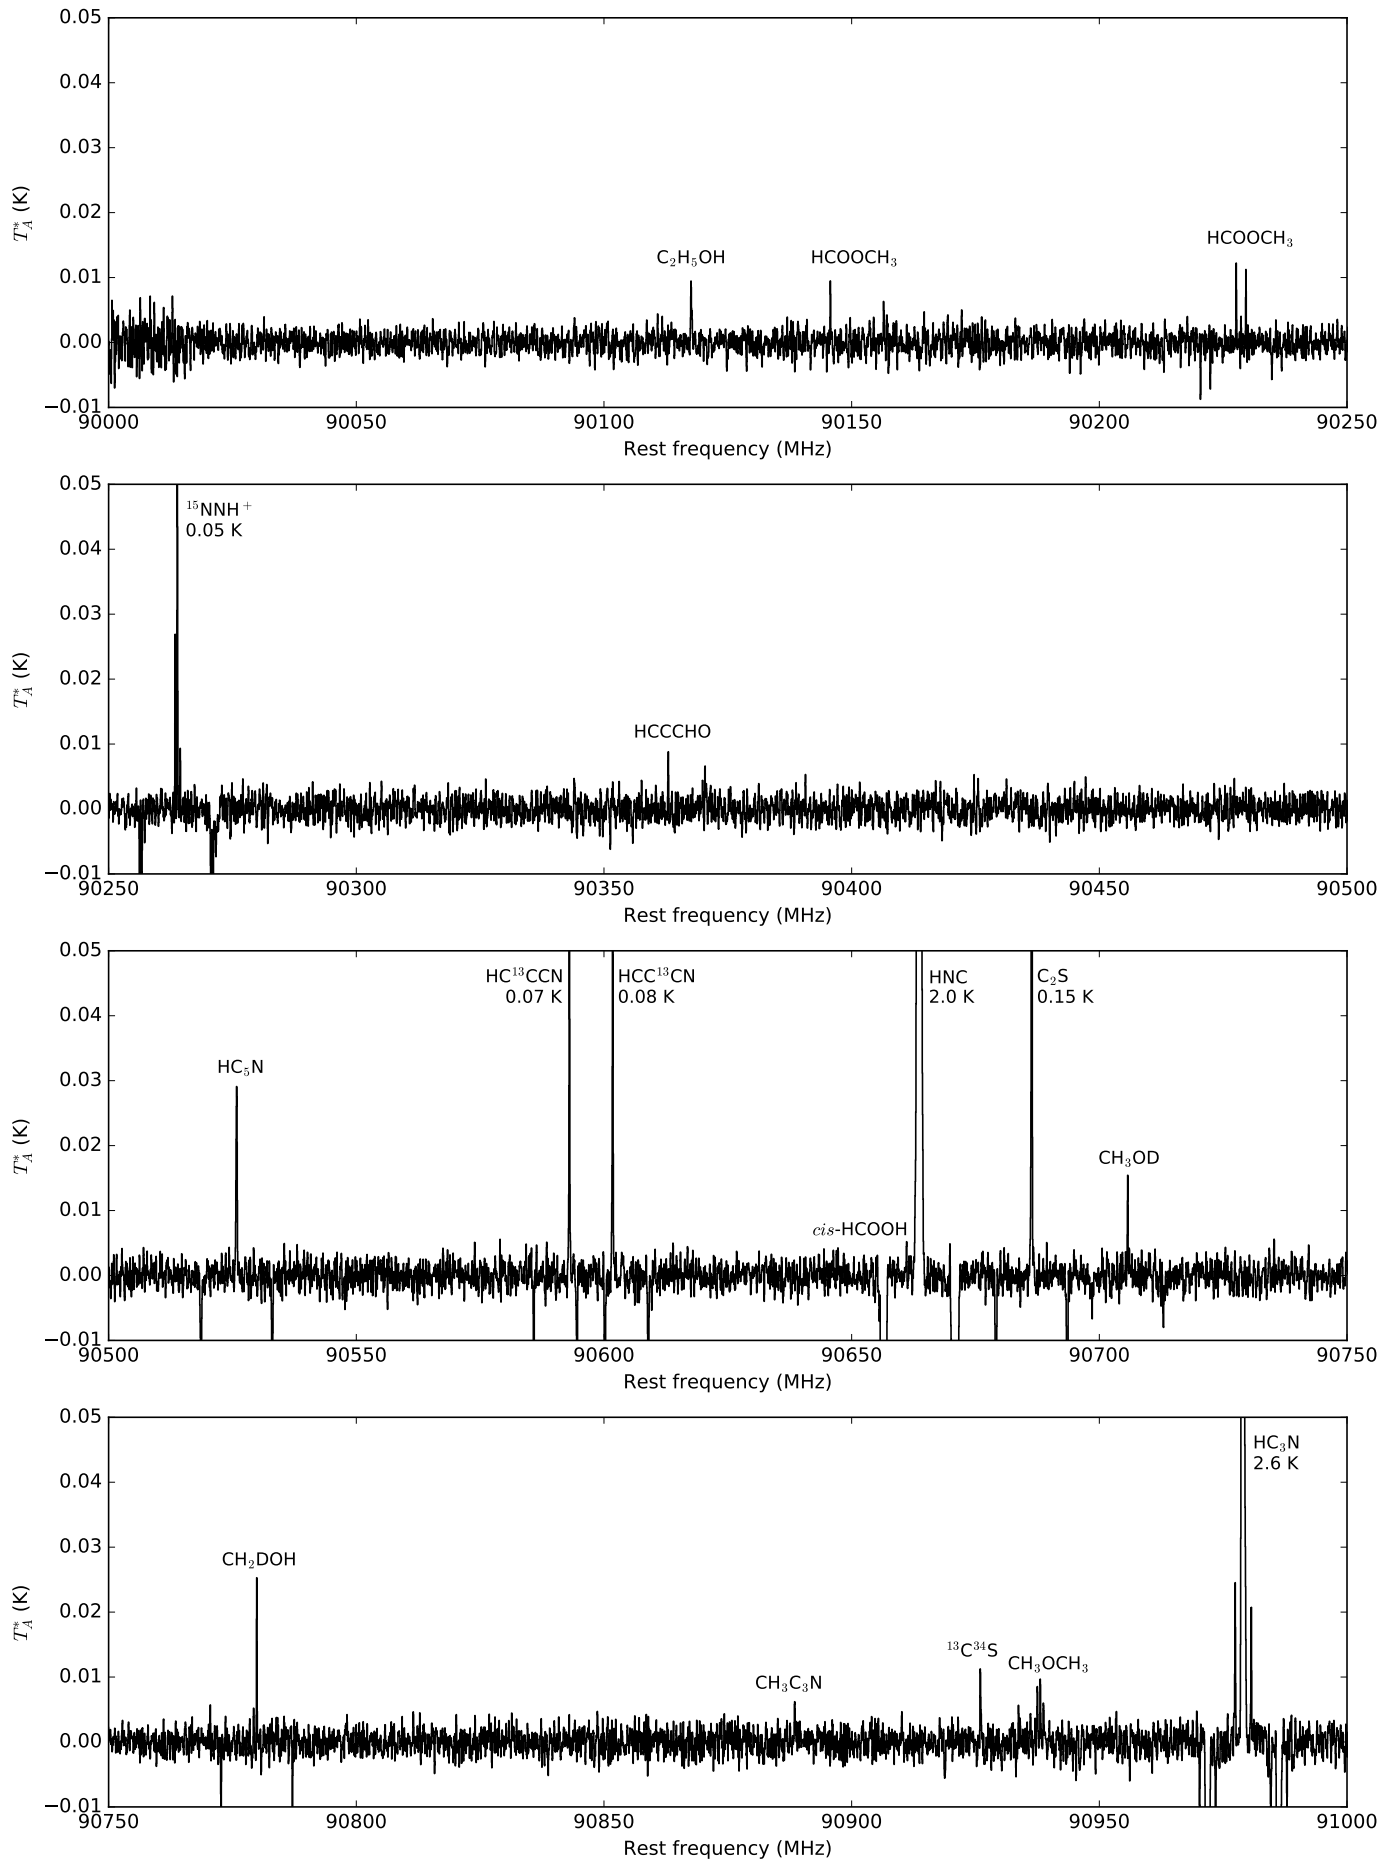

Fig. A.1. Continued

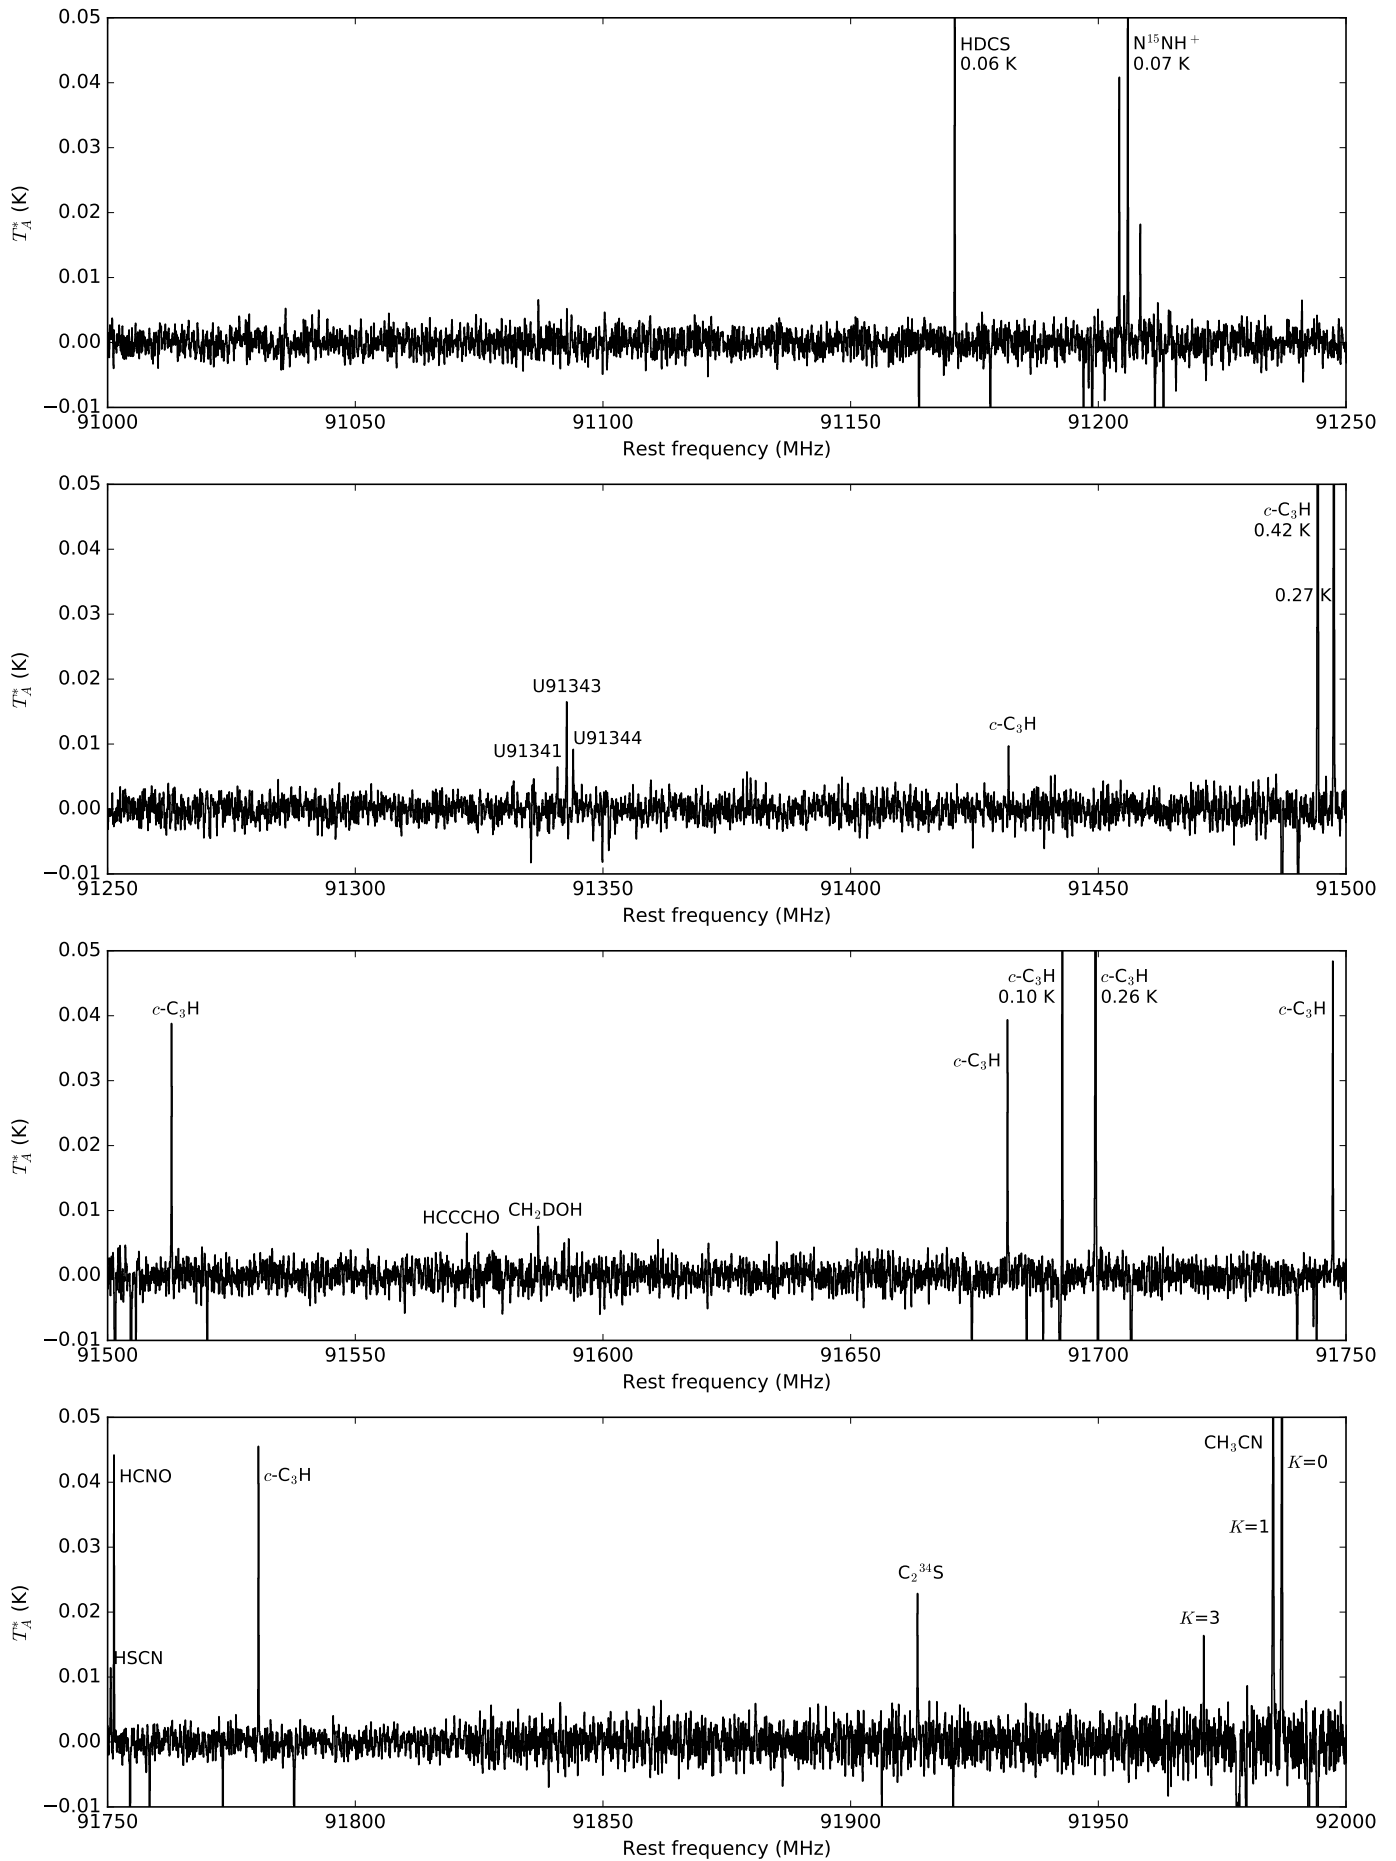

**Fig. A.1.** Continued  
Article number, page 46 of 70

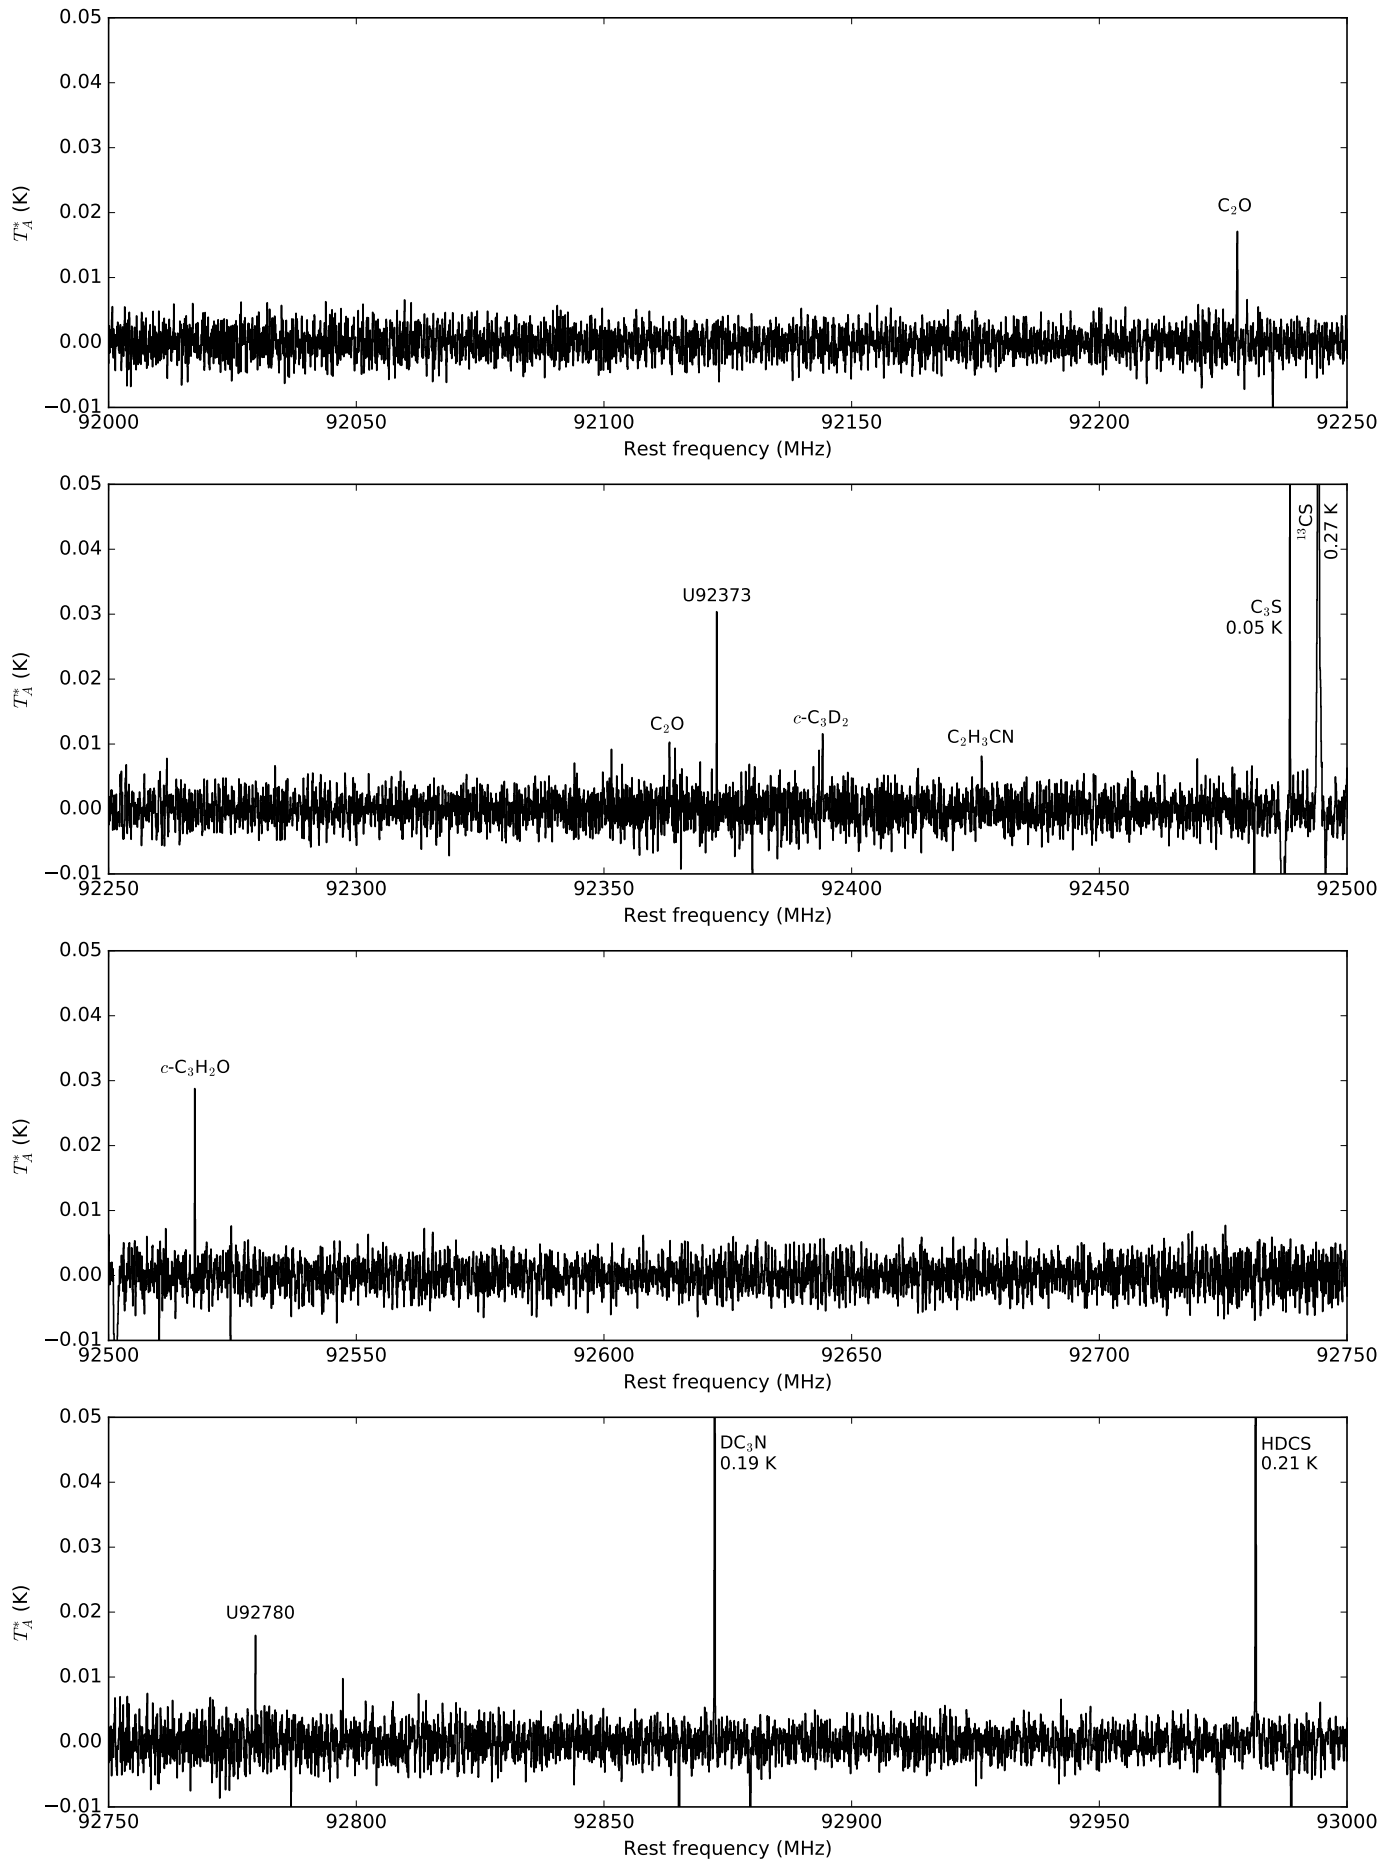

Fig. A.1. Continued



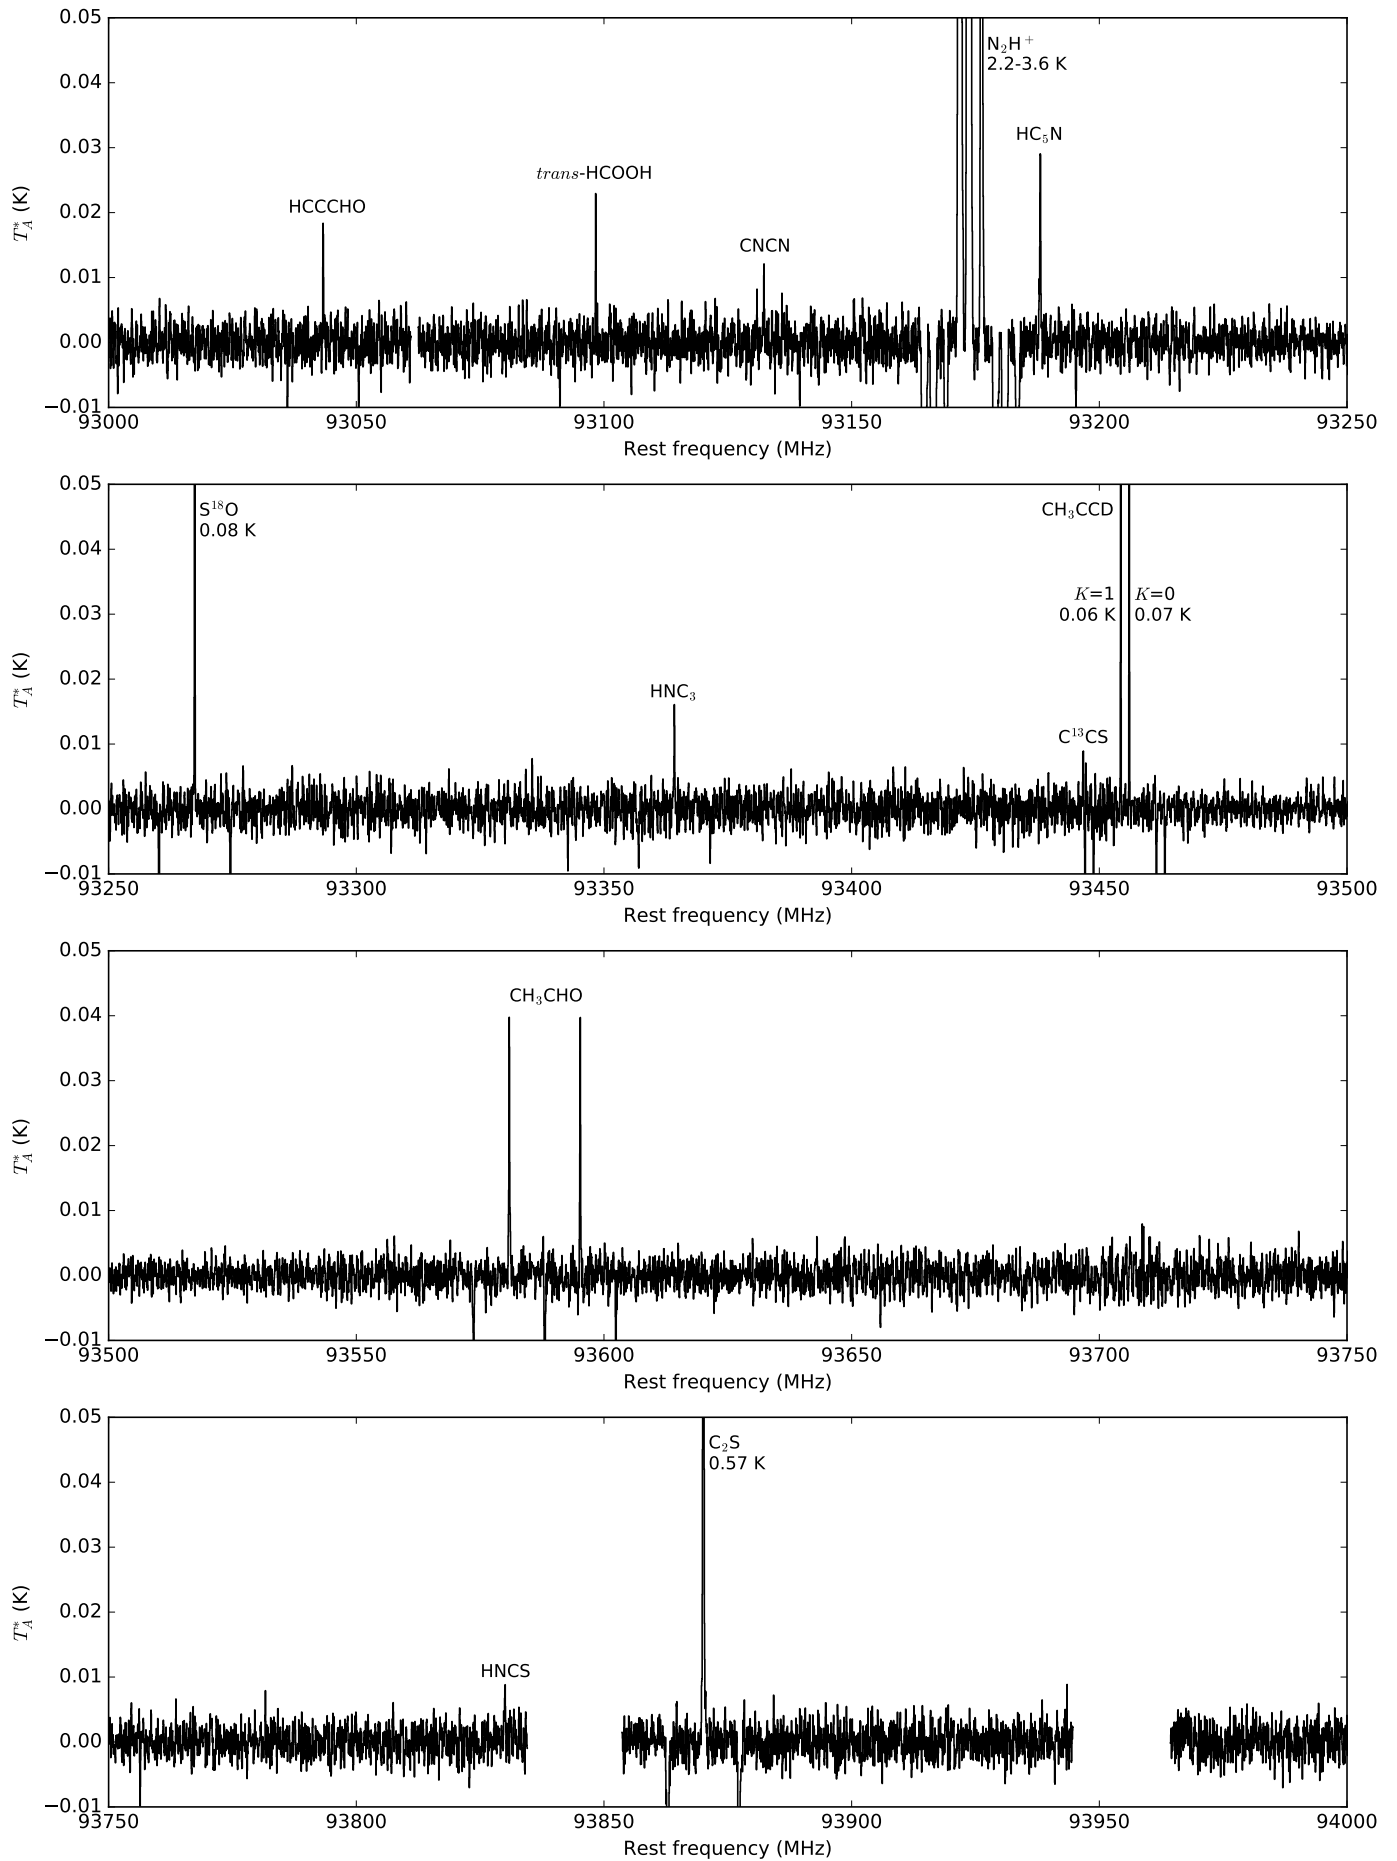

**Fig. A.1.** Continued  
Article number, page 48 of 70

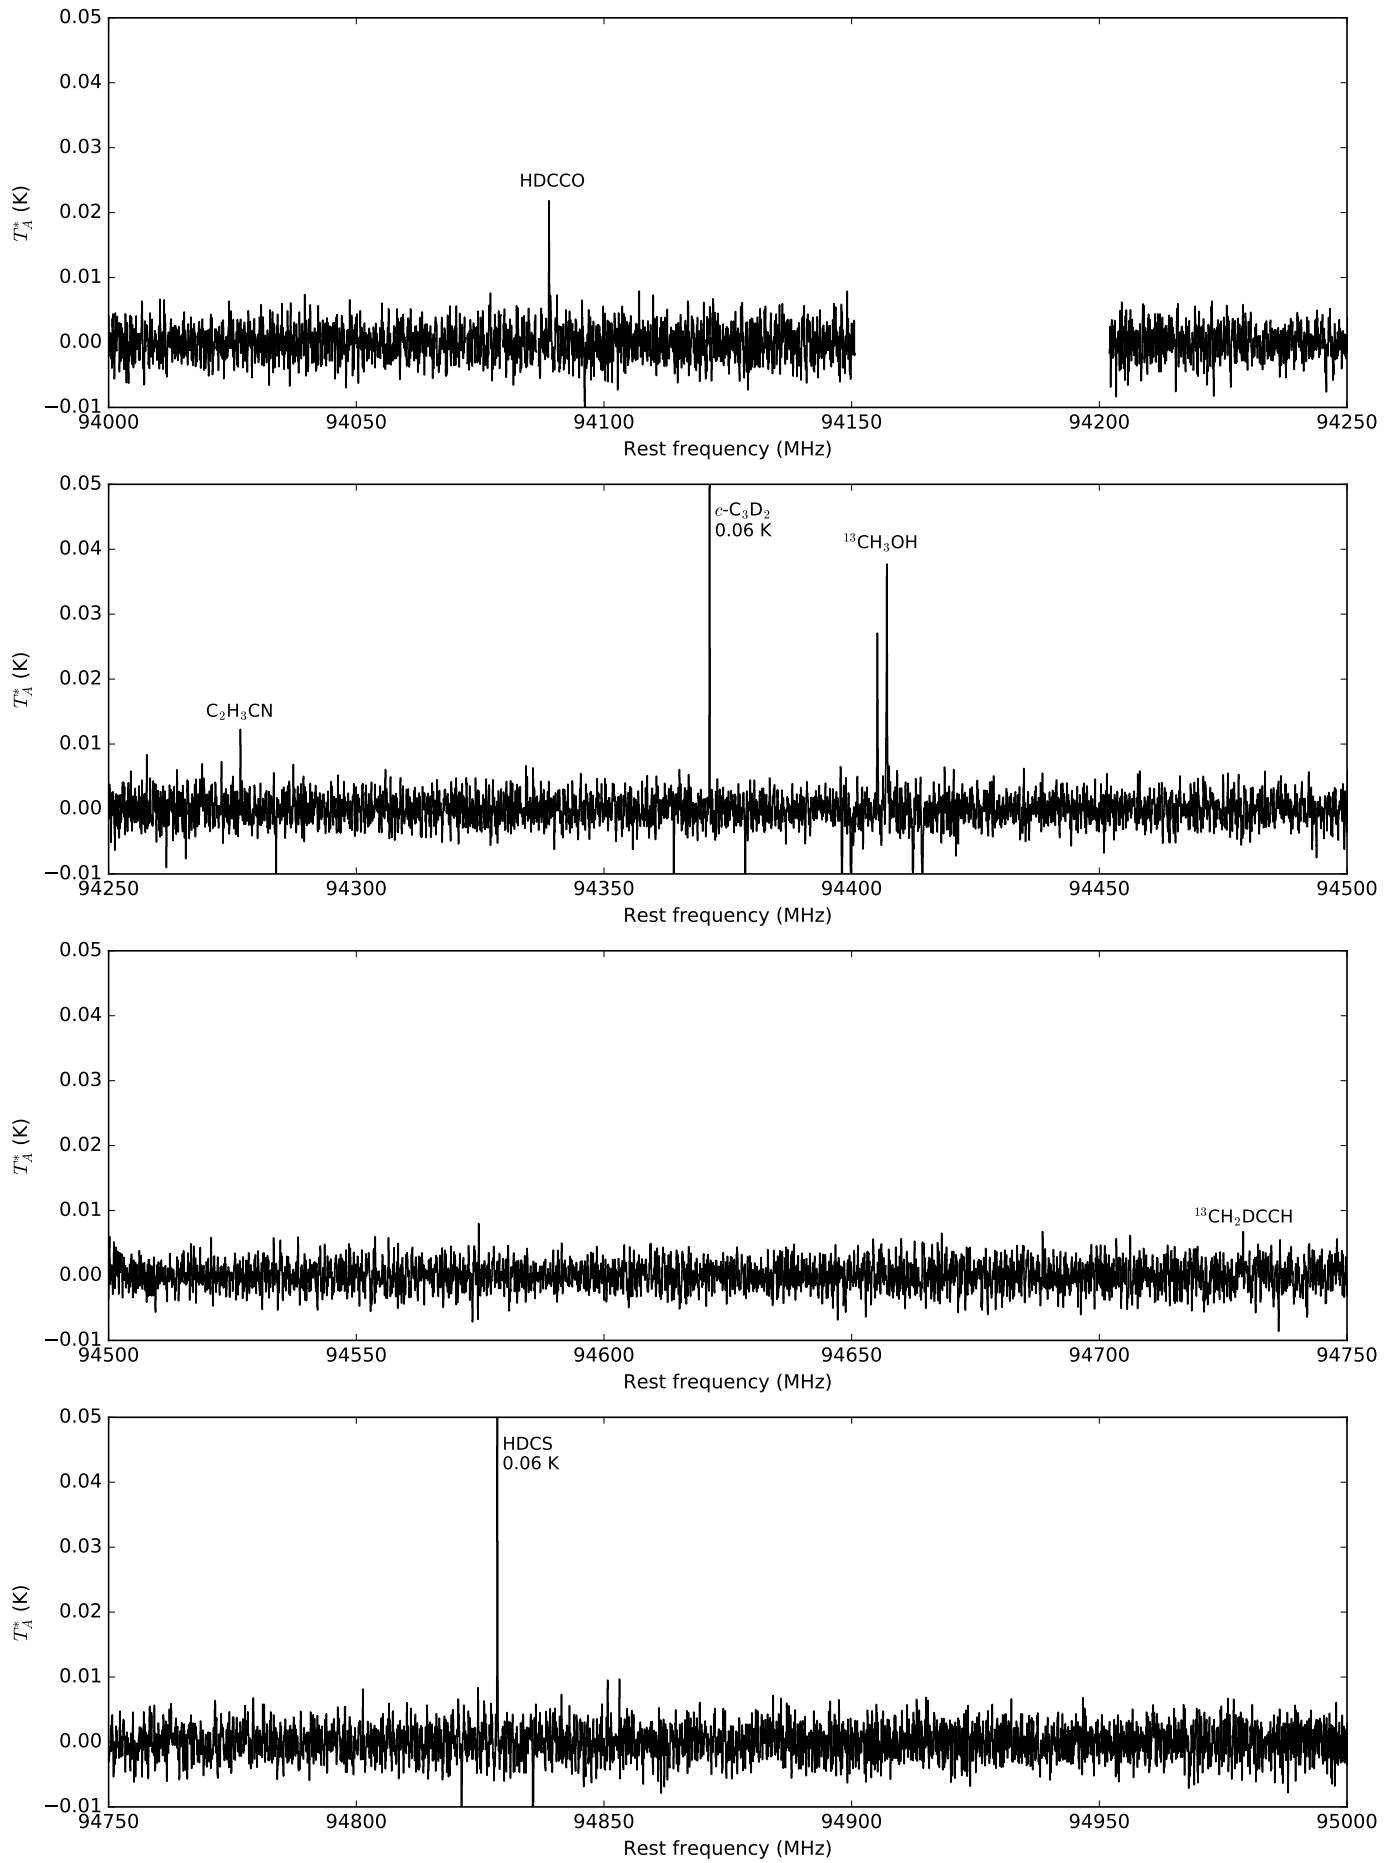

Fig. A.1. Continued

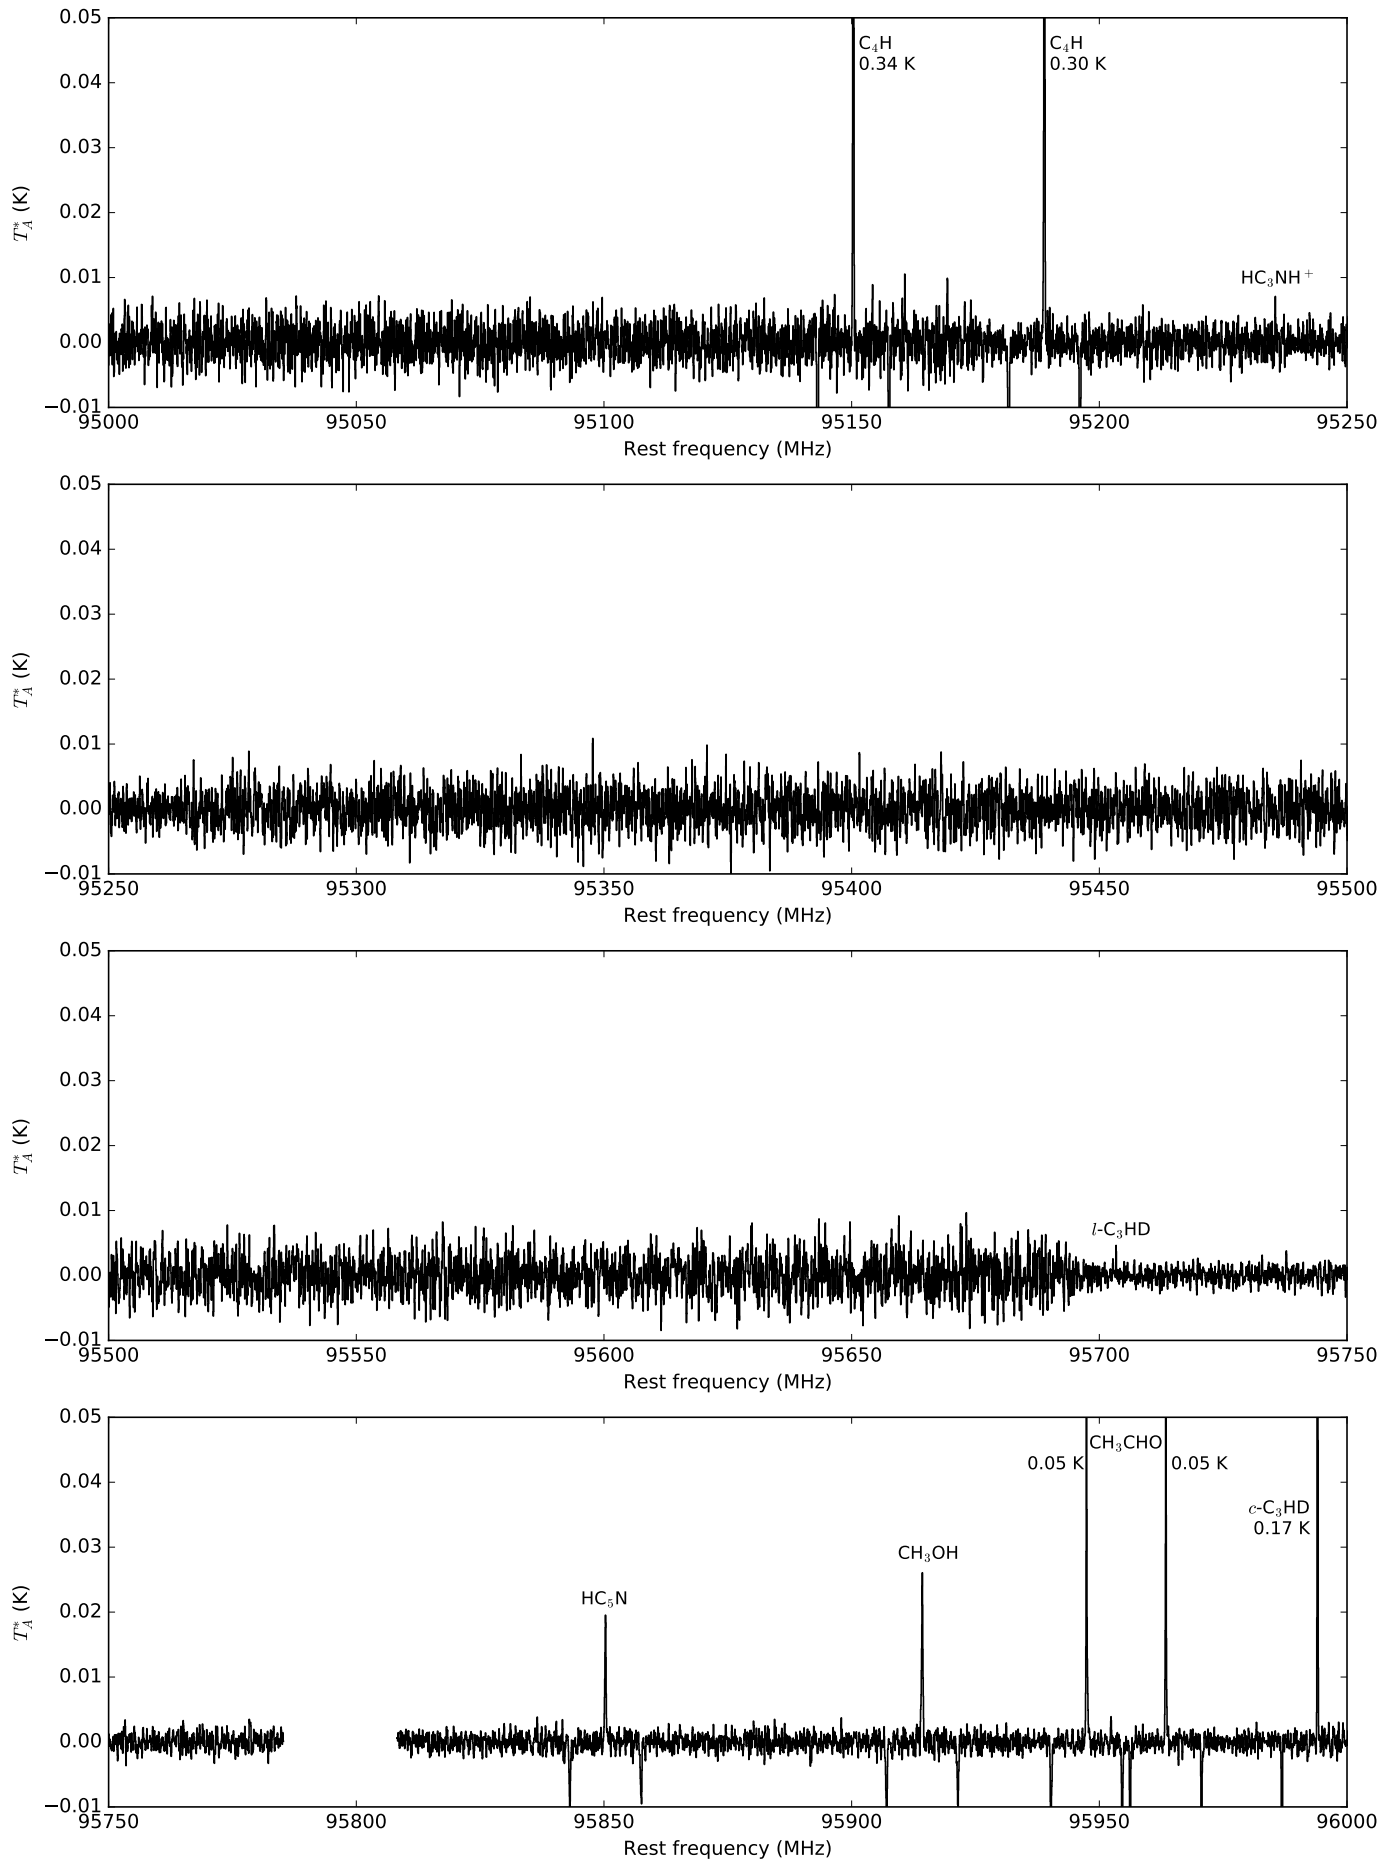

**Fig. A.1.** Continued  
Article number, page 50 of 70

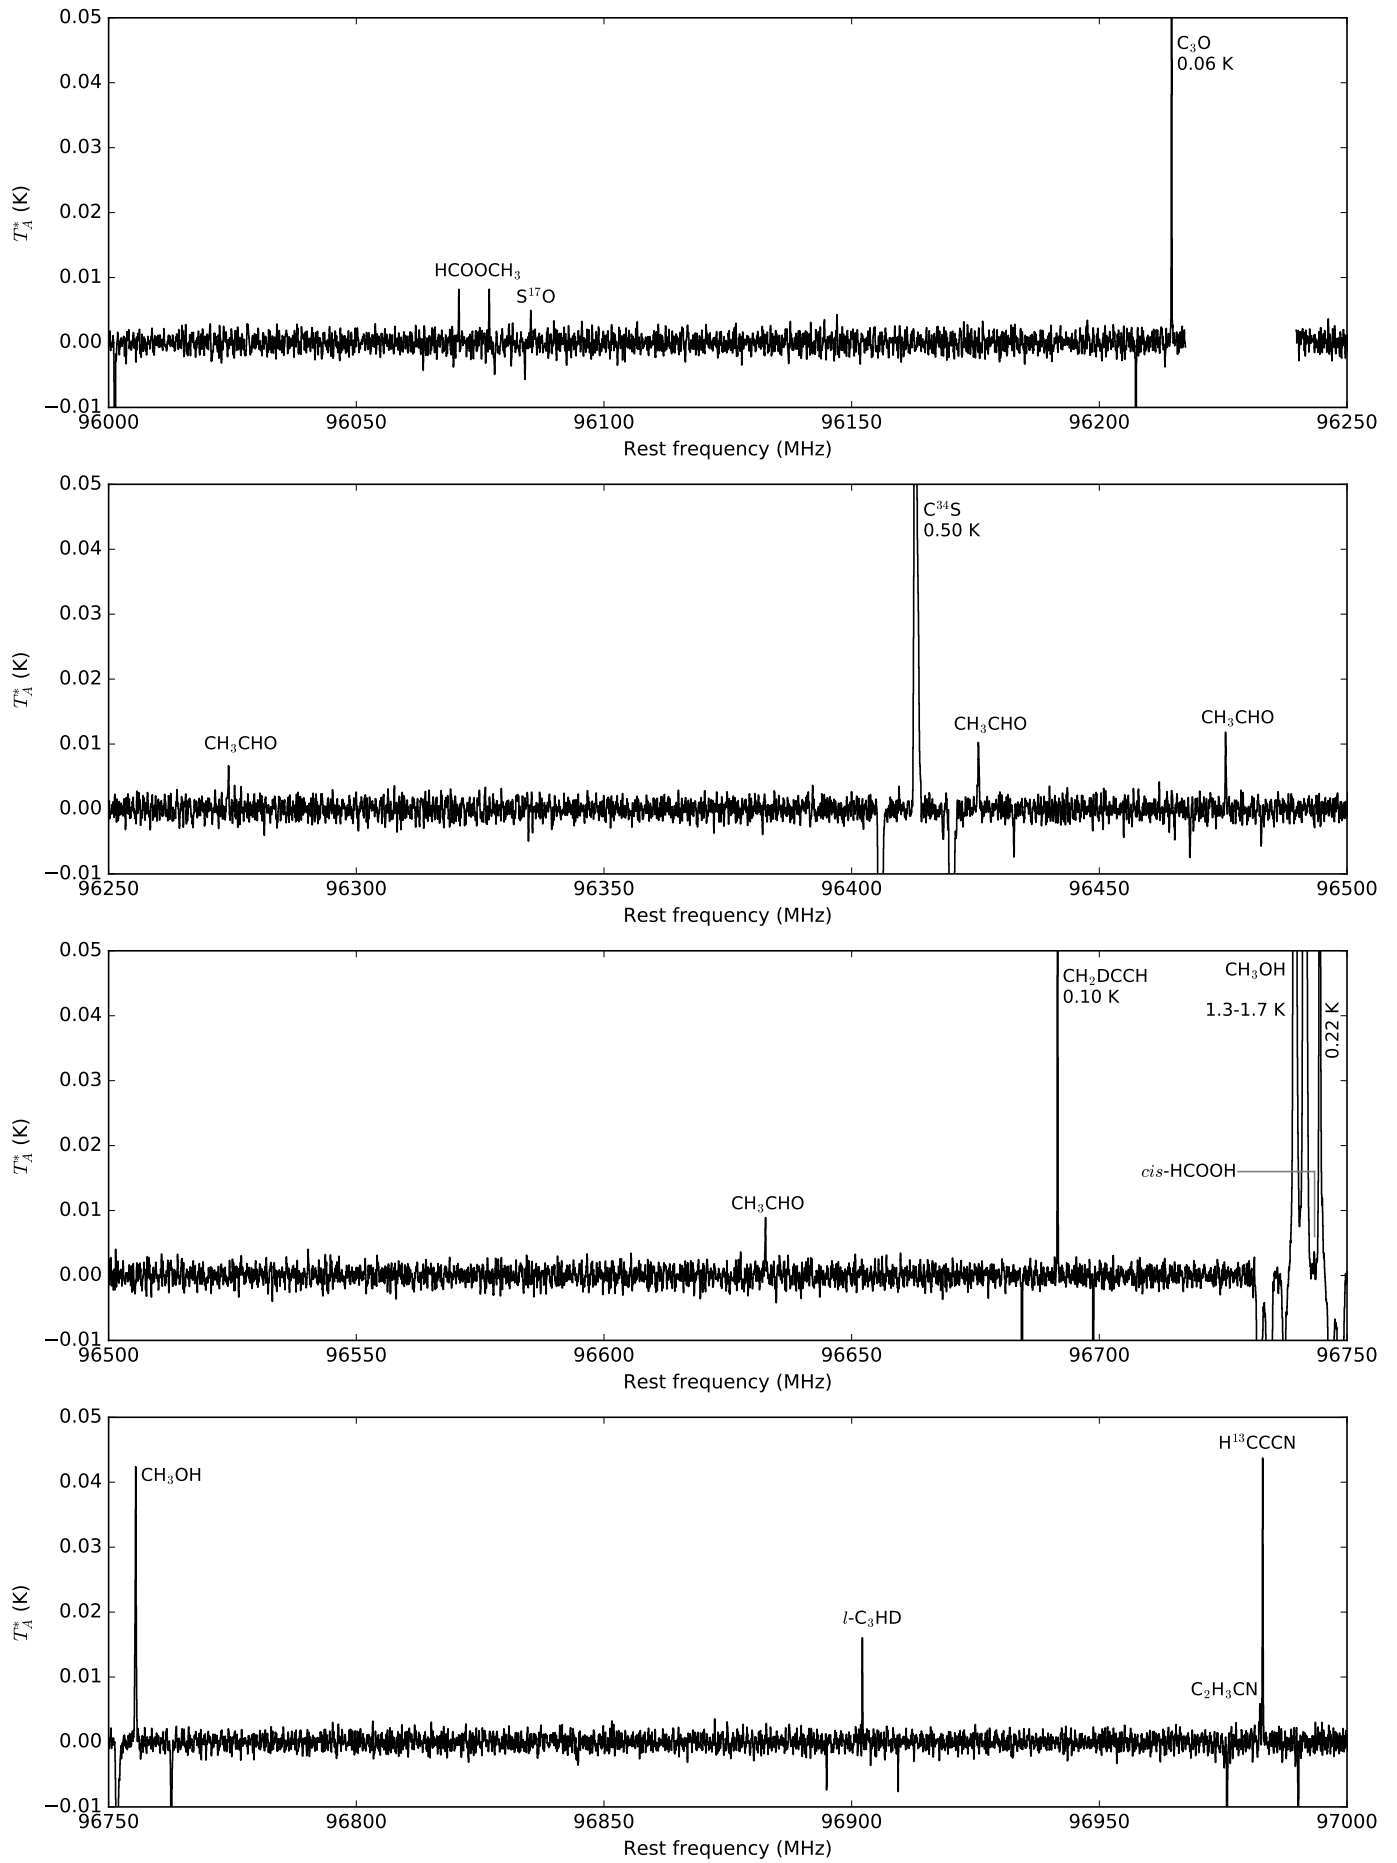

Fig. A.1. Continued

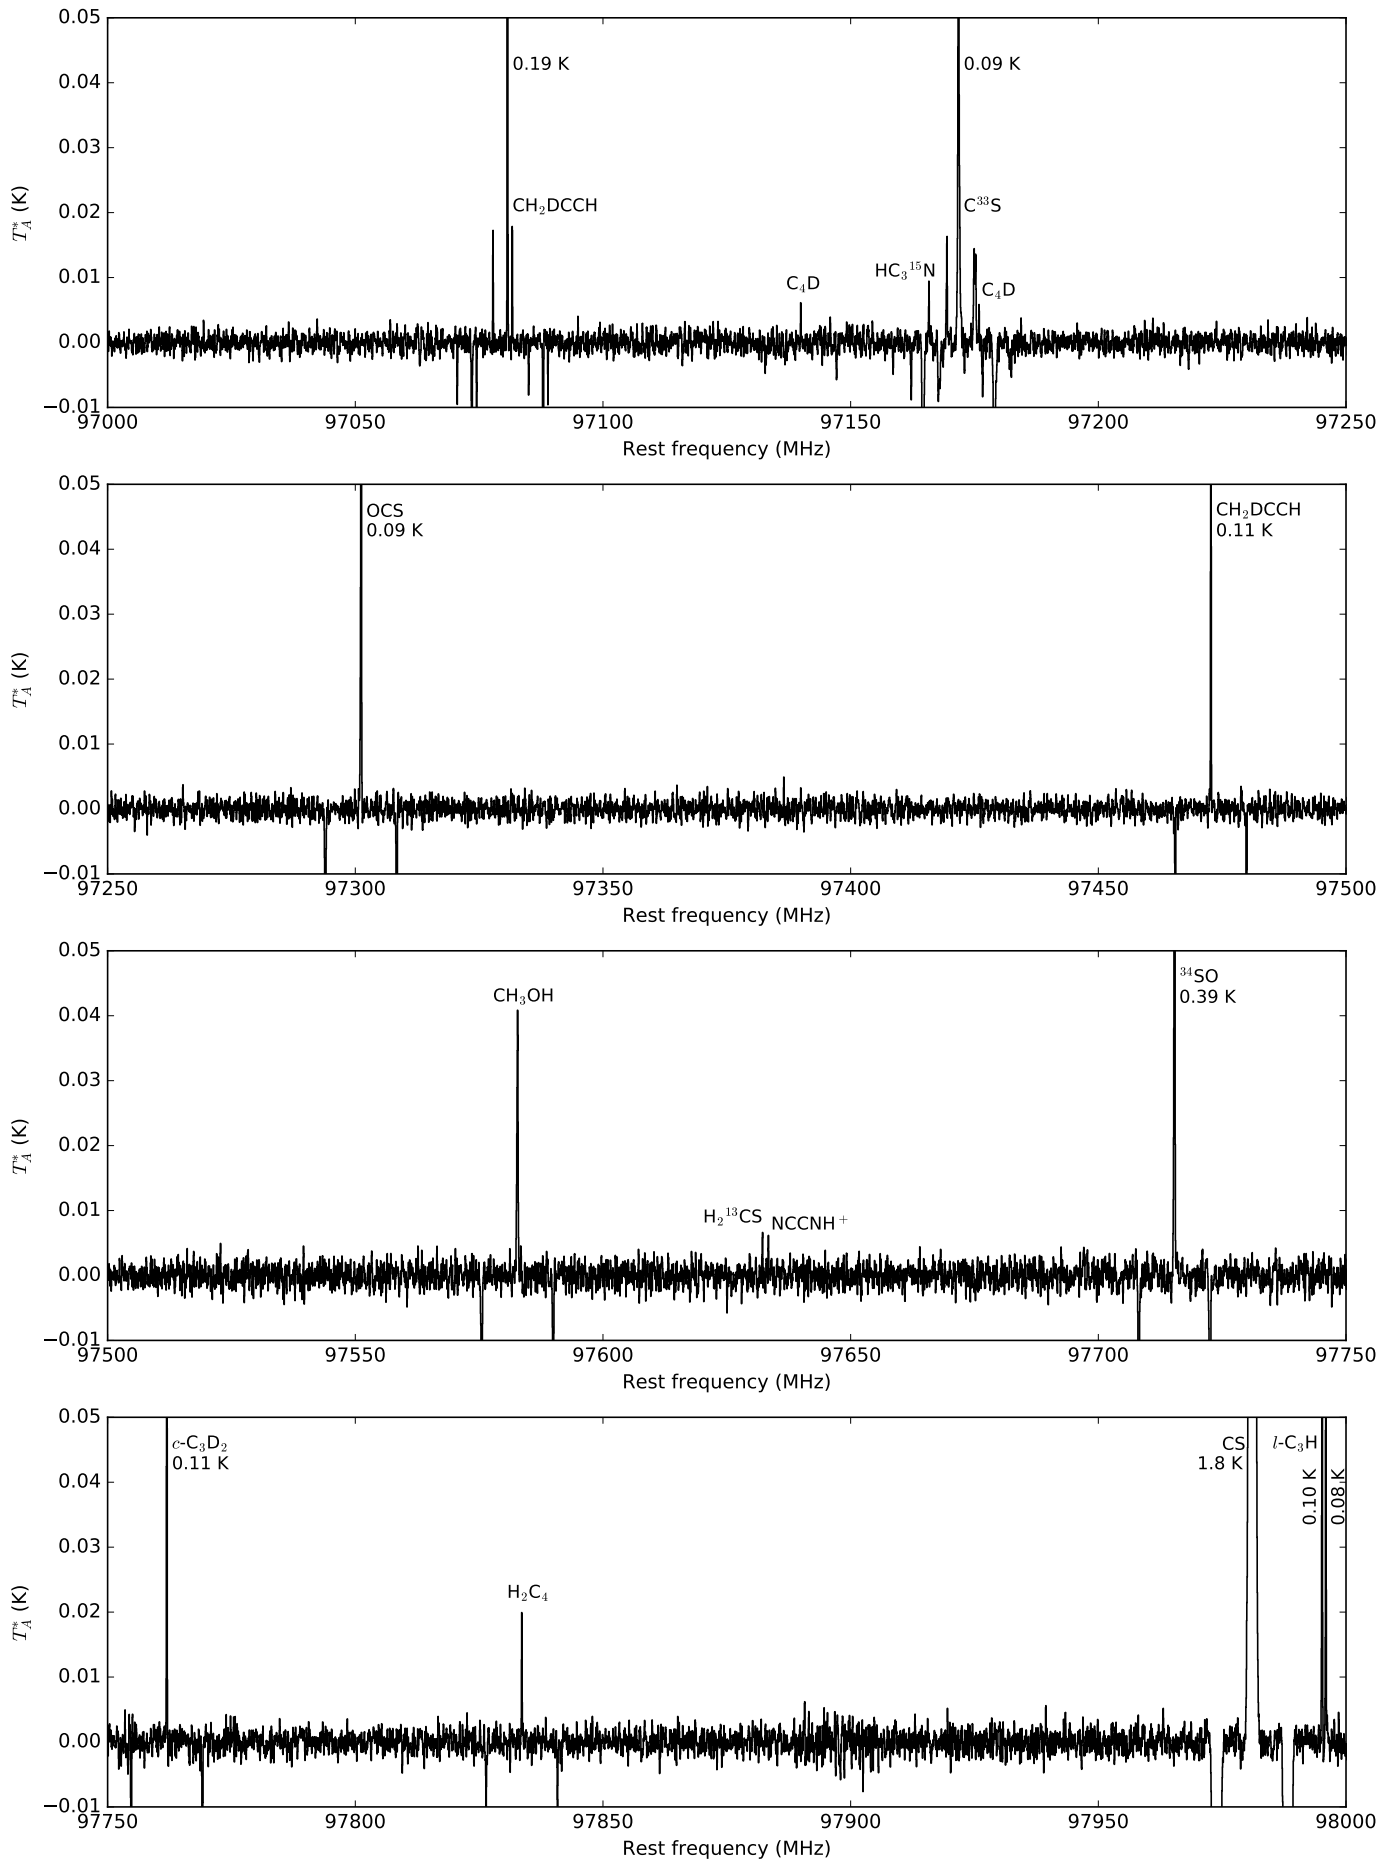

**Fig. A.1.** Continued  
Article number, page 52 of 70

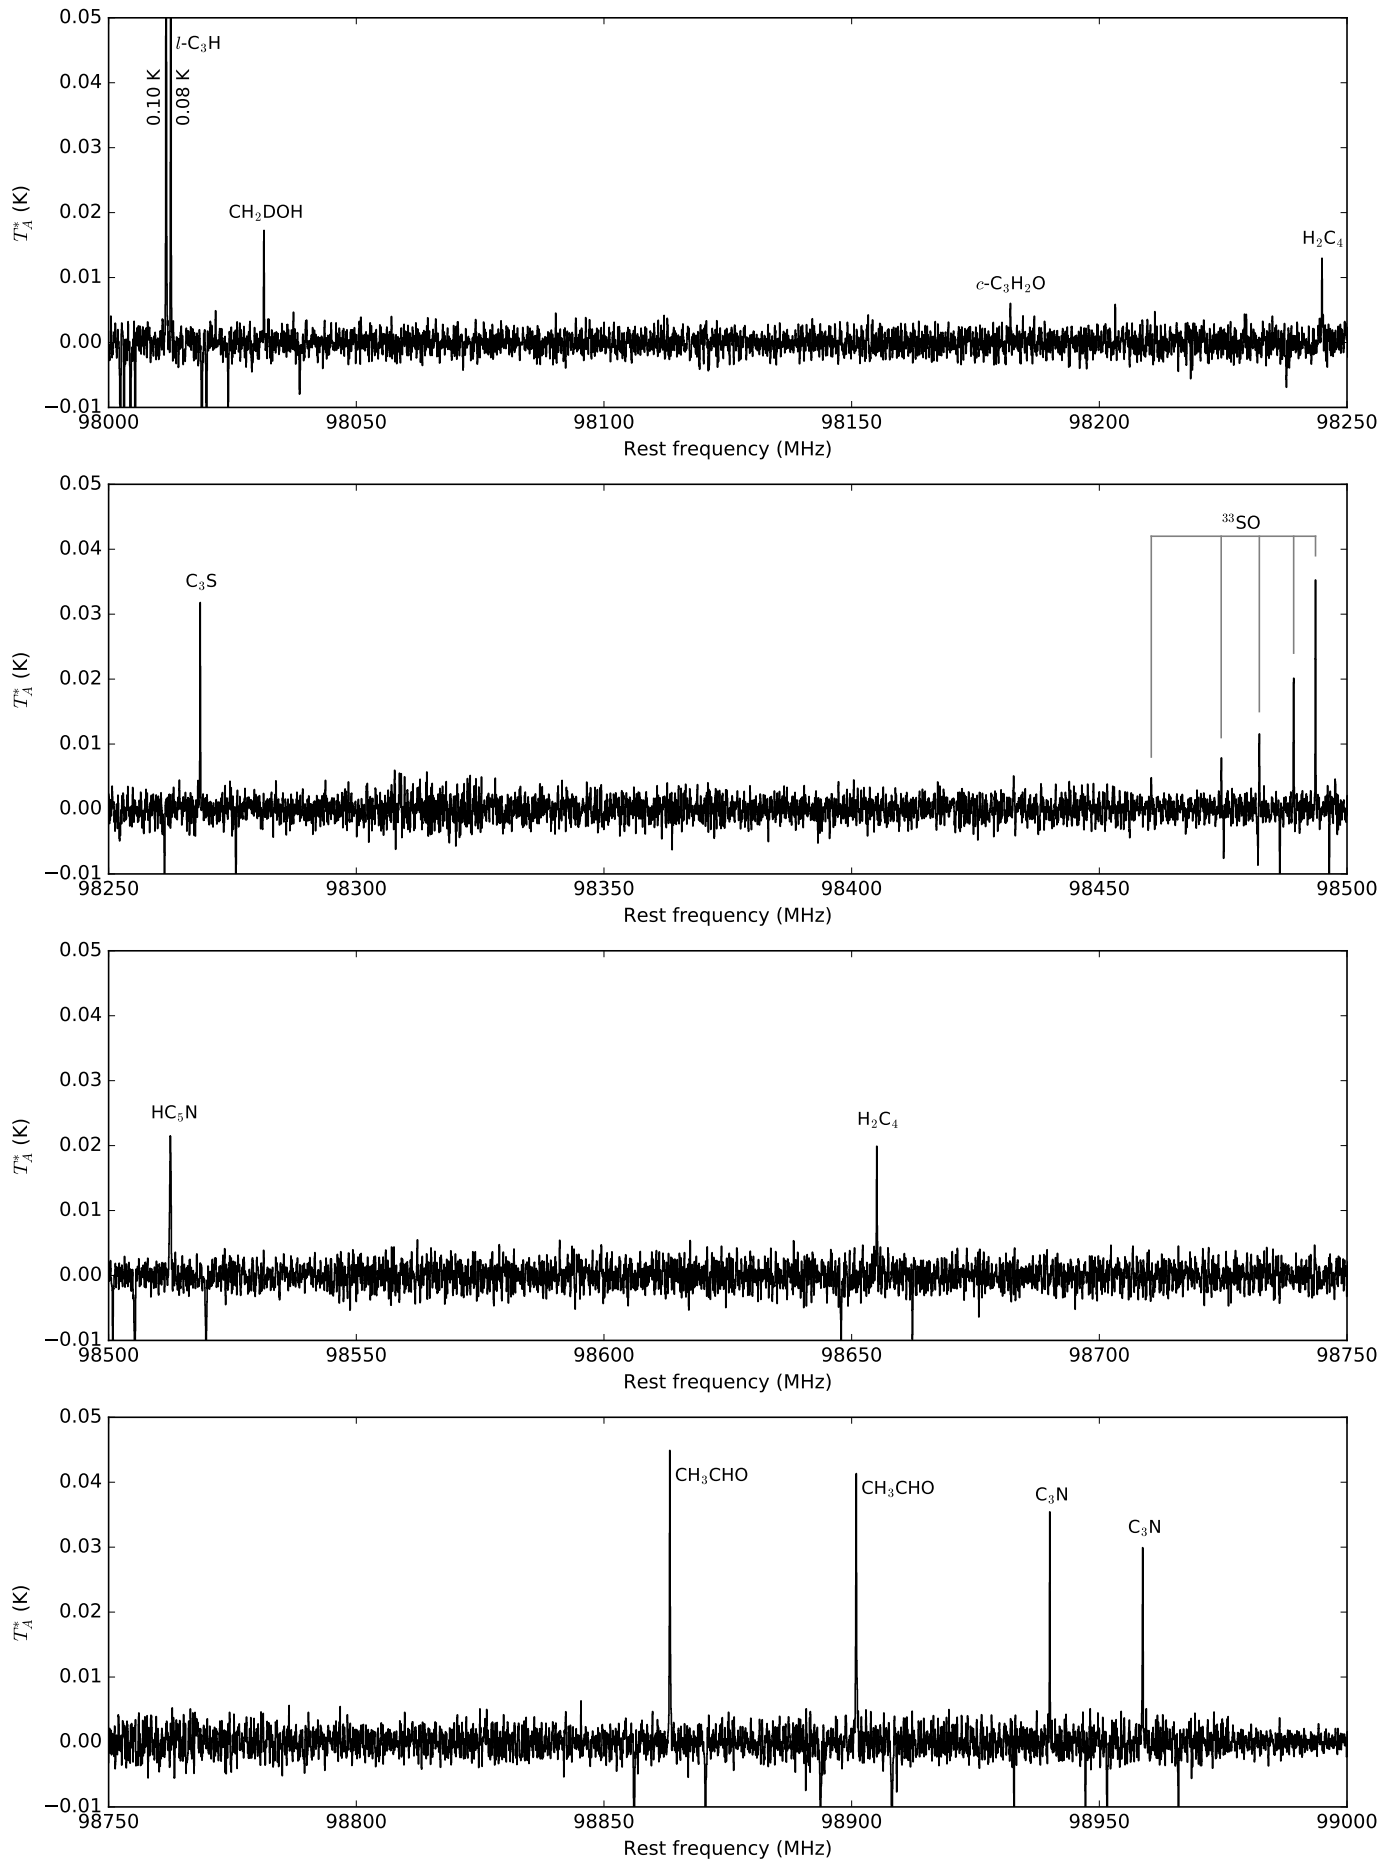

Fig. A.1. Continued

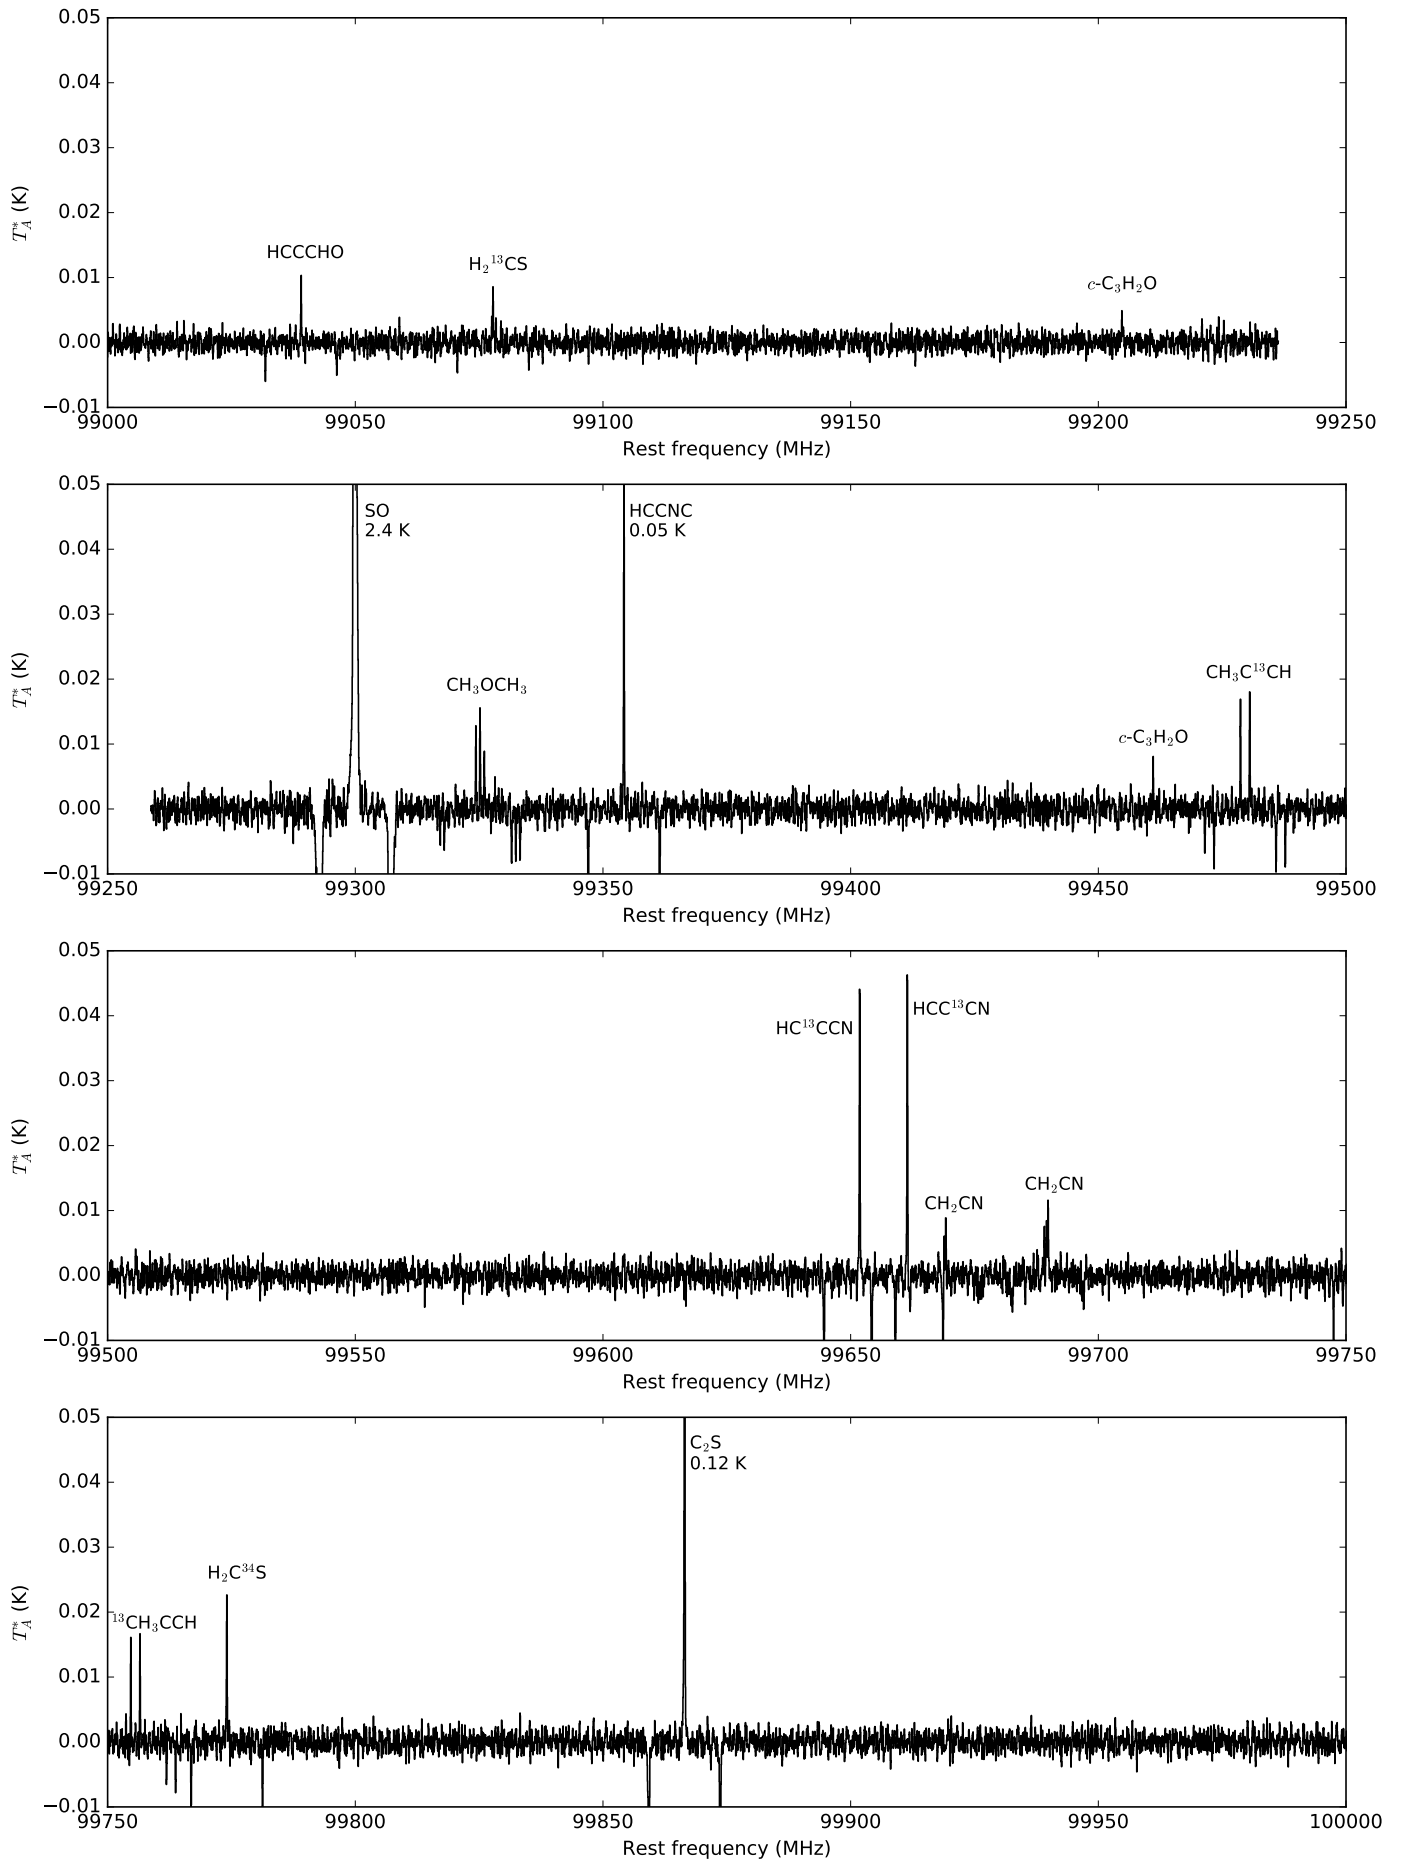

**Fig. A.1.** Continued  
Article number, page 54 of 70

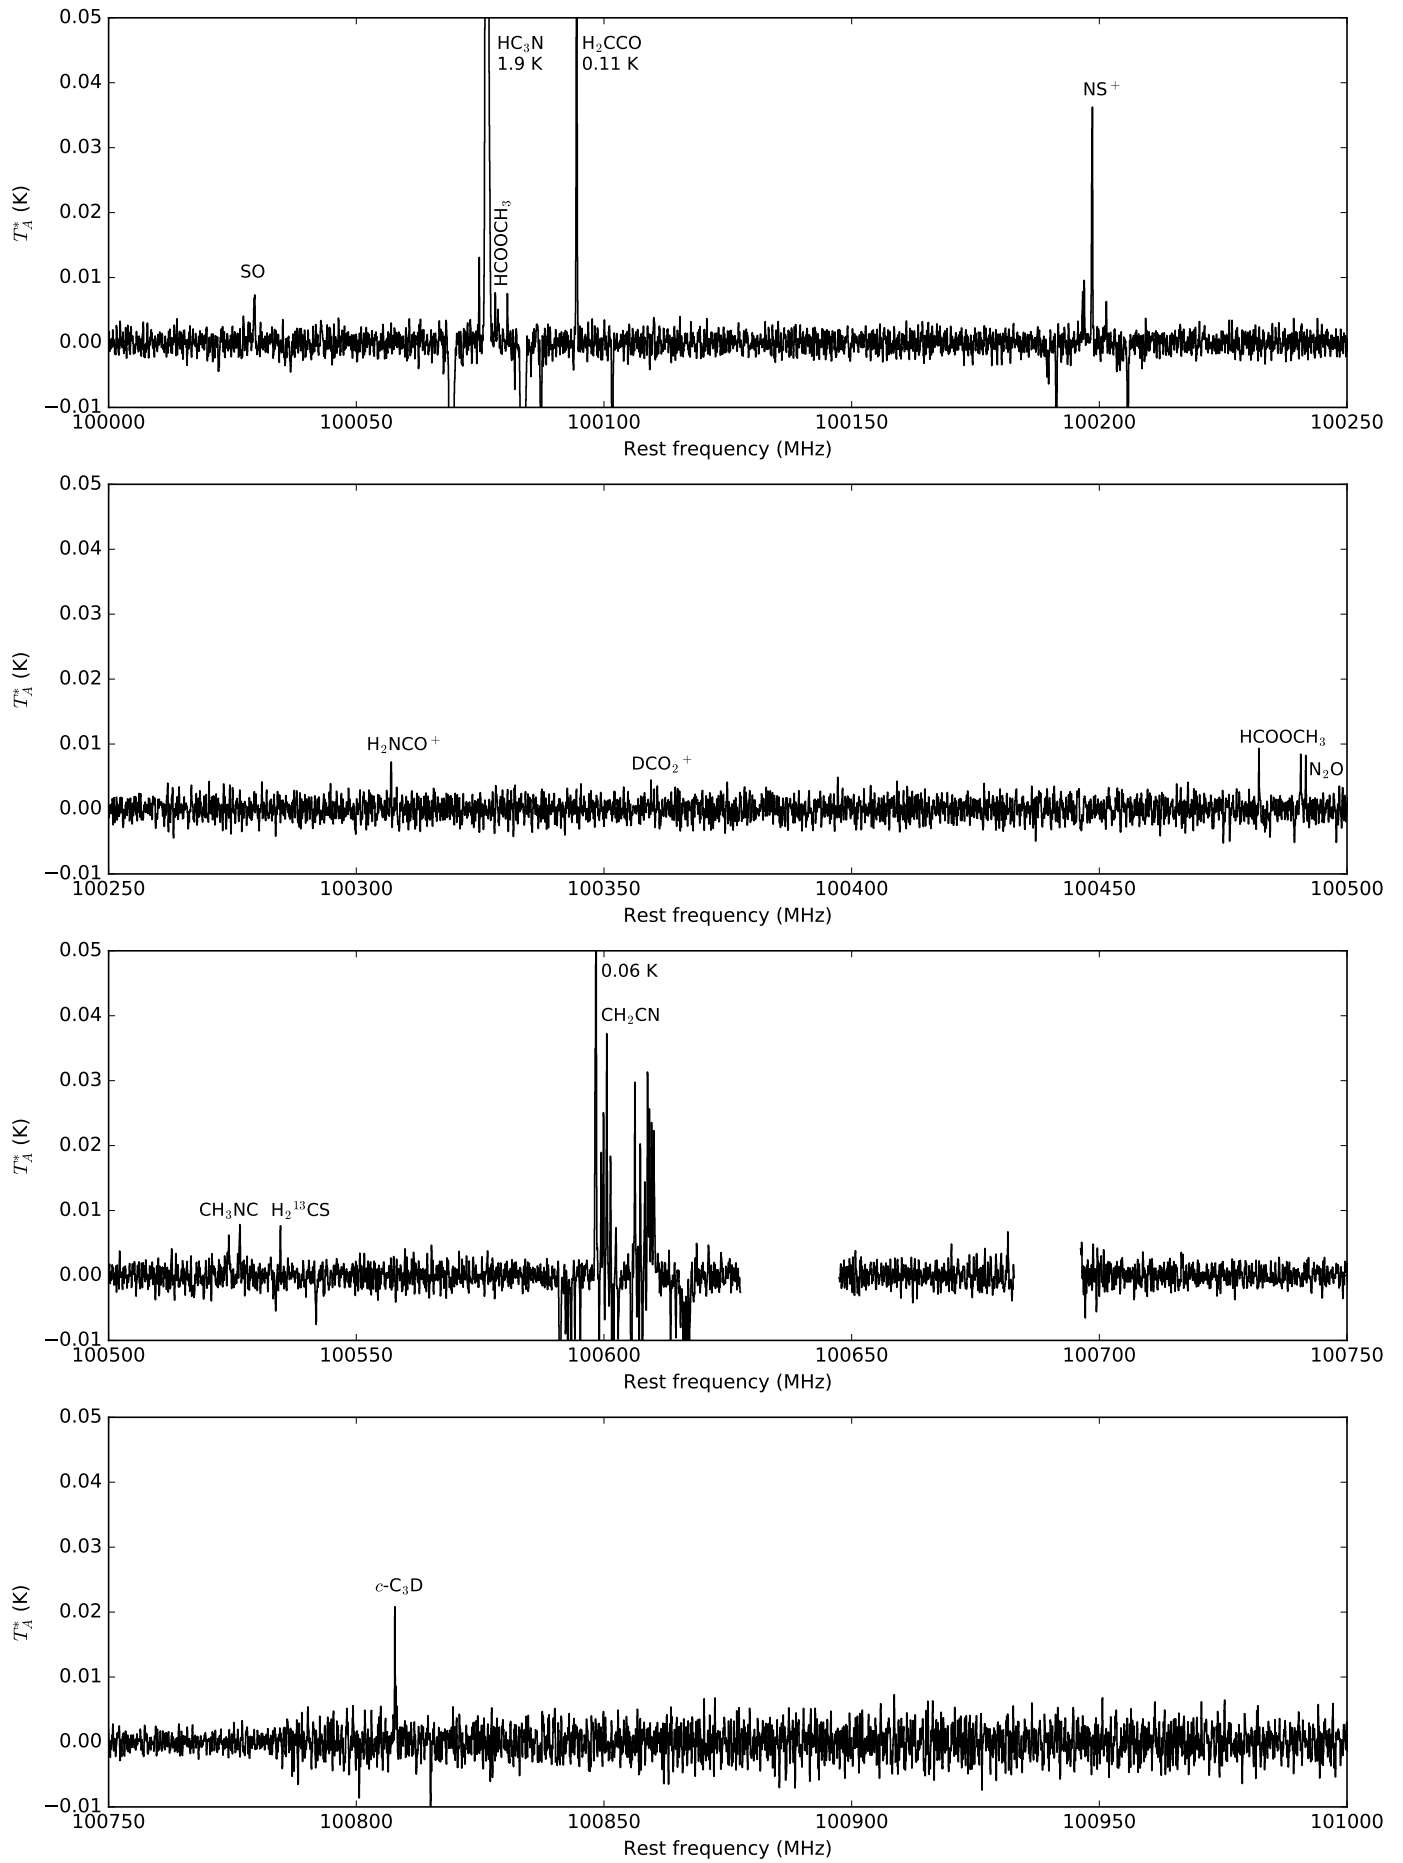

Fig. A.1. Continued



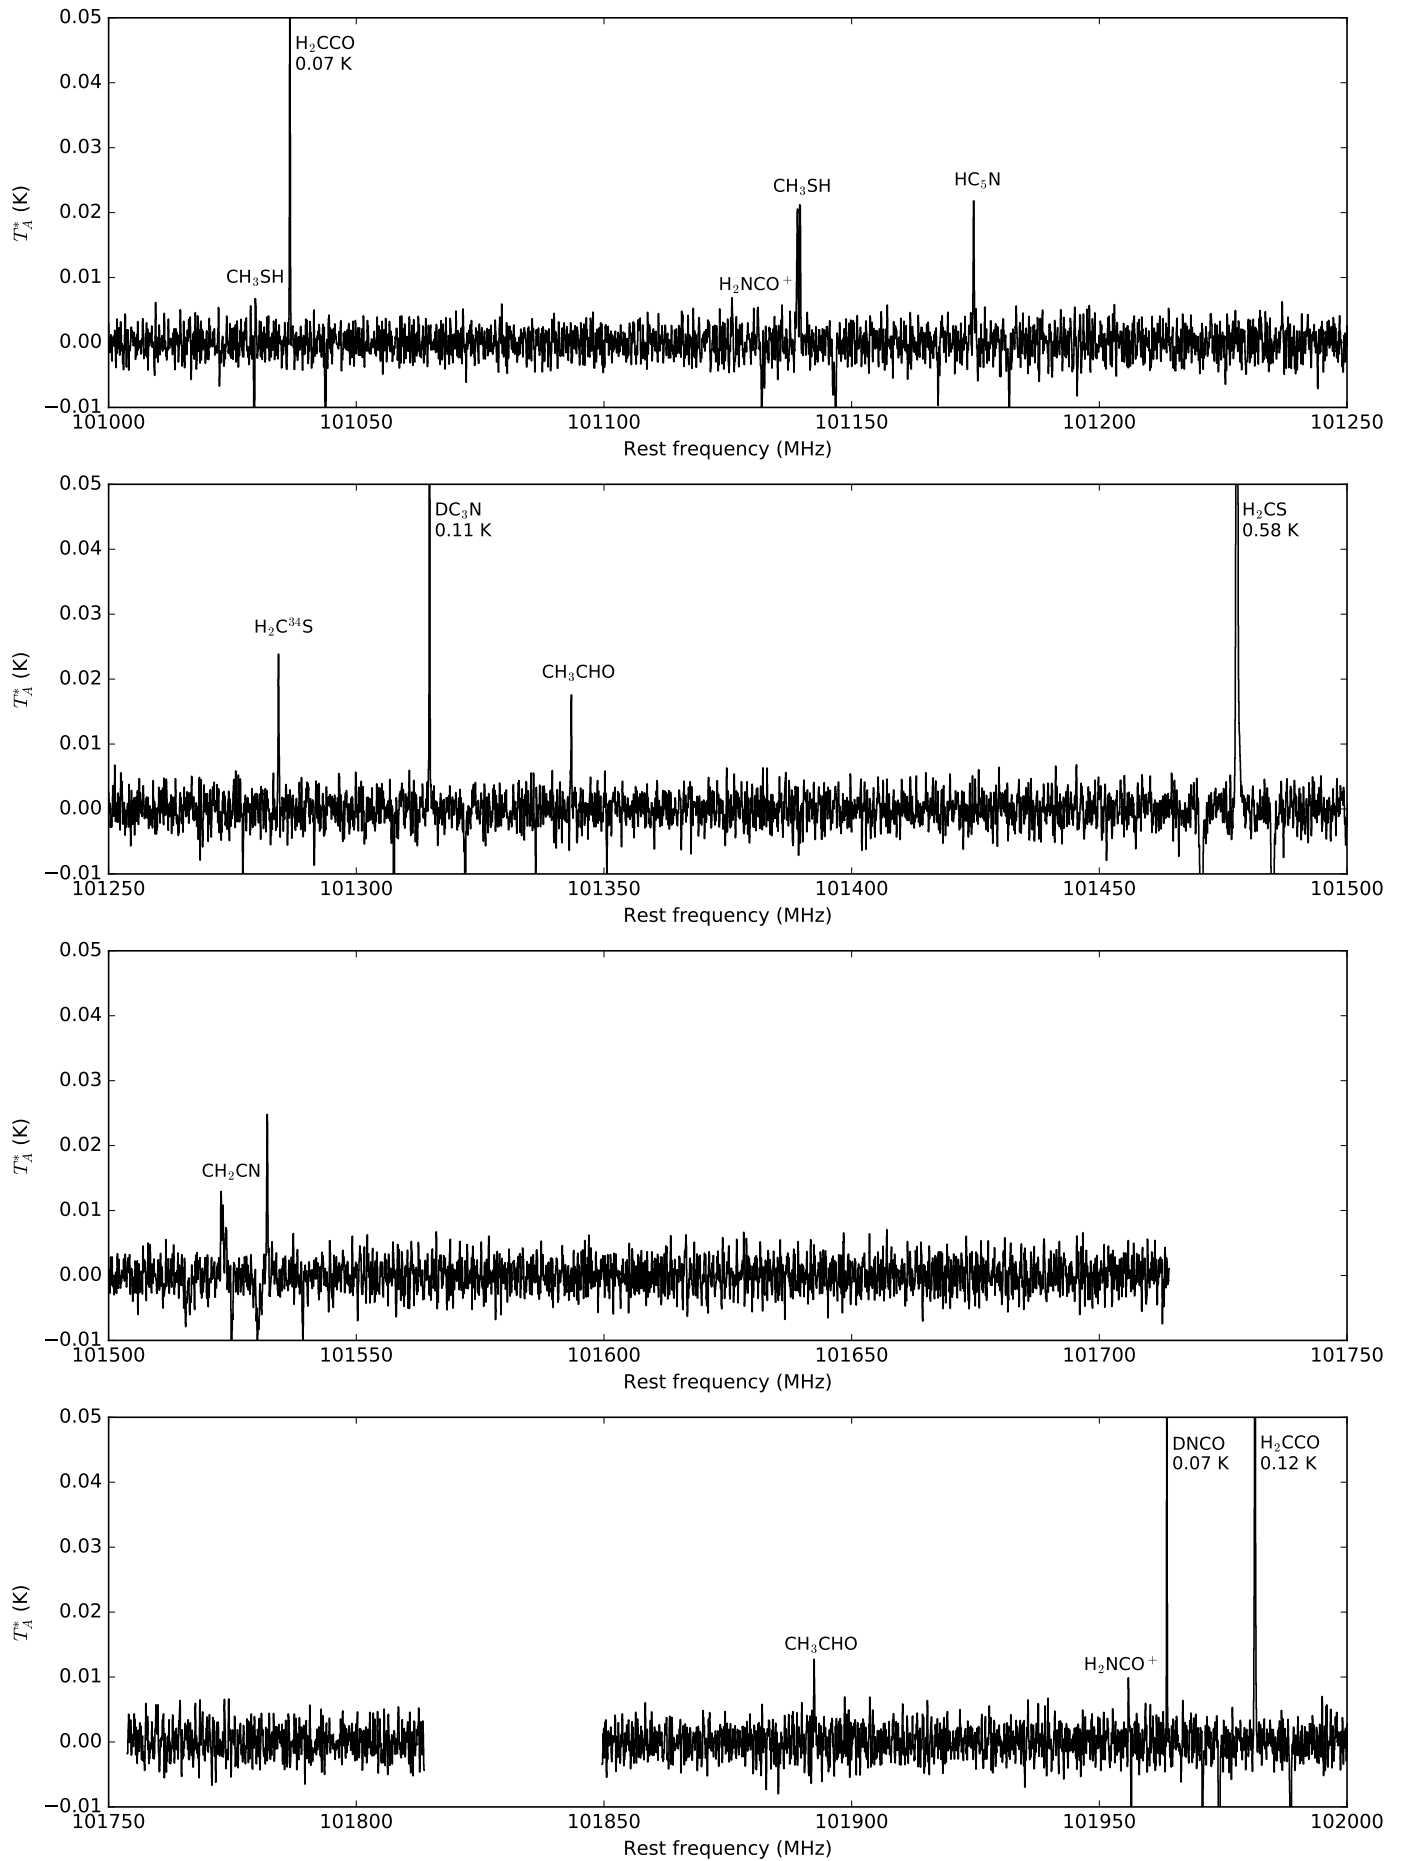

**Fig. A.1.** Continued  
Article number, page 56 of 70

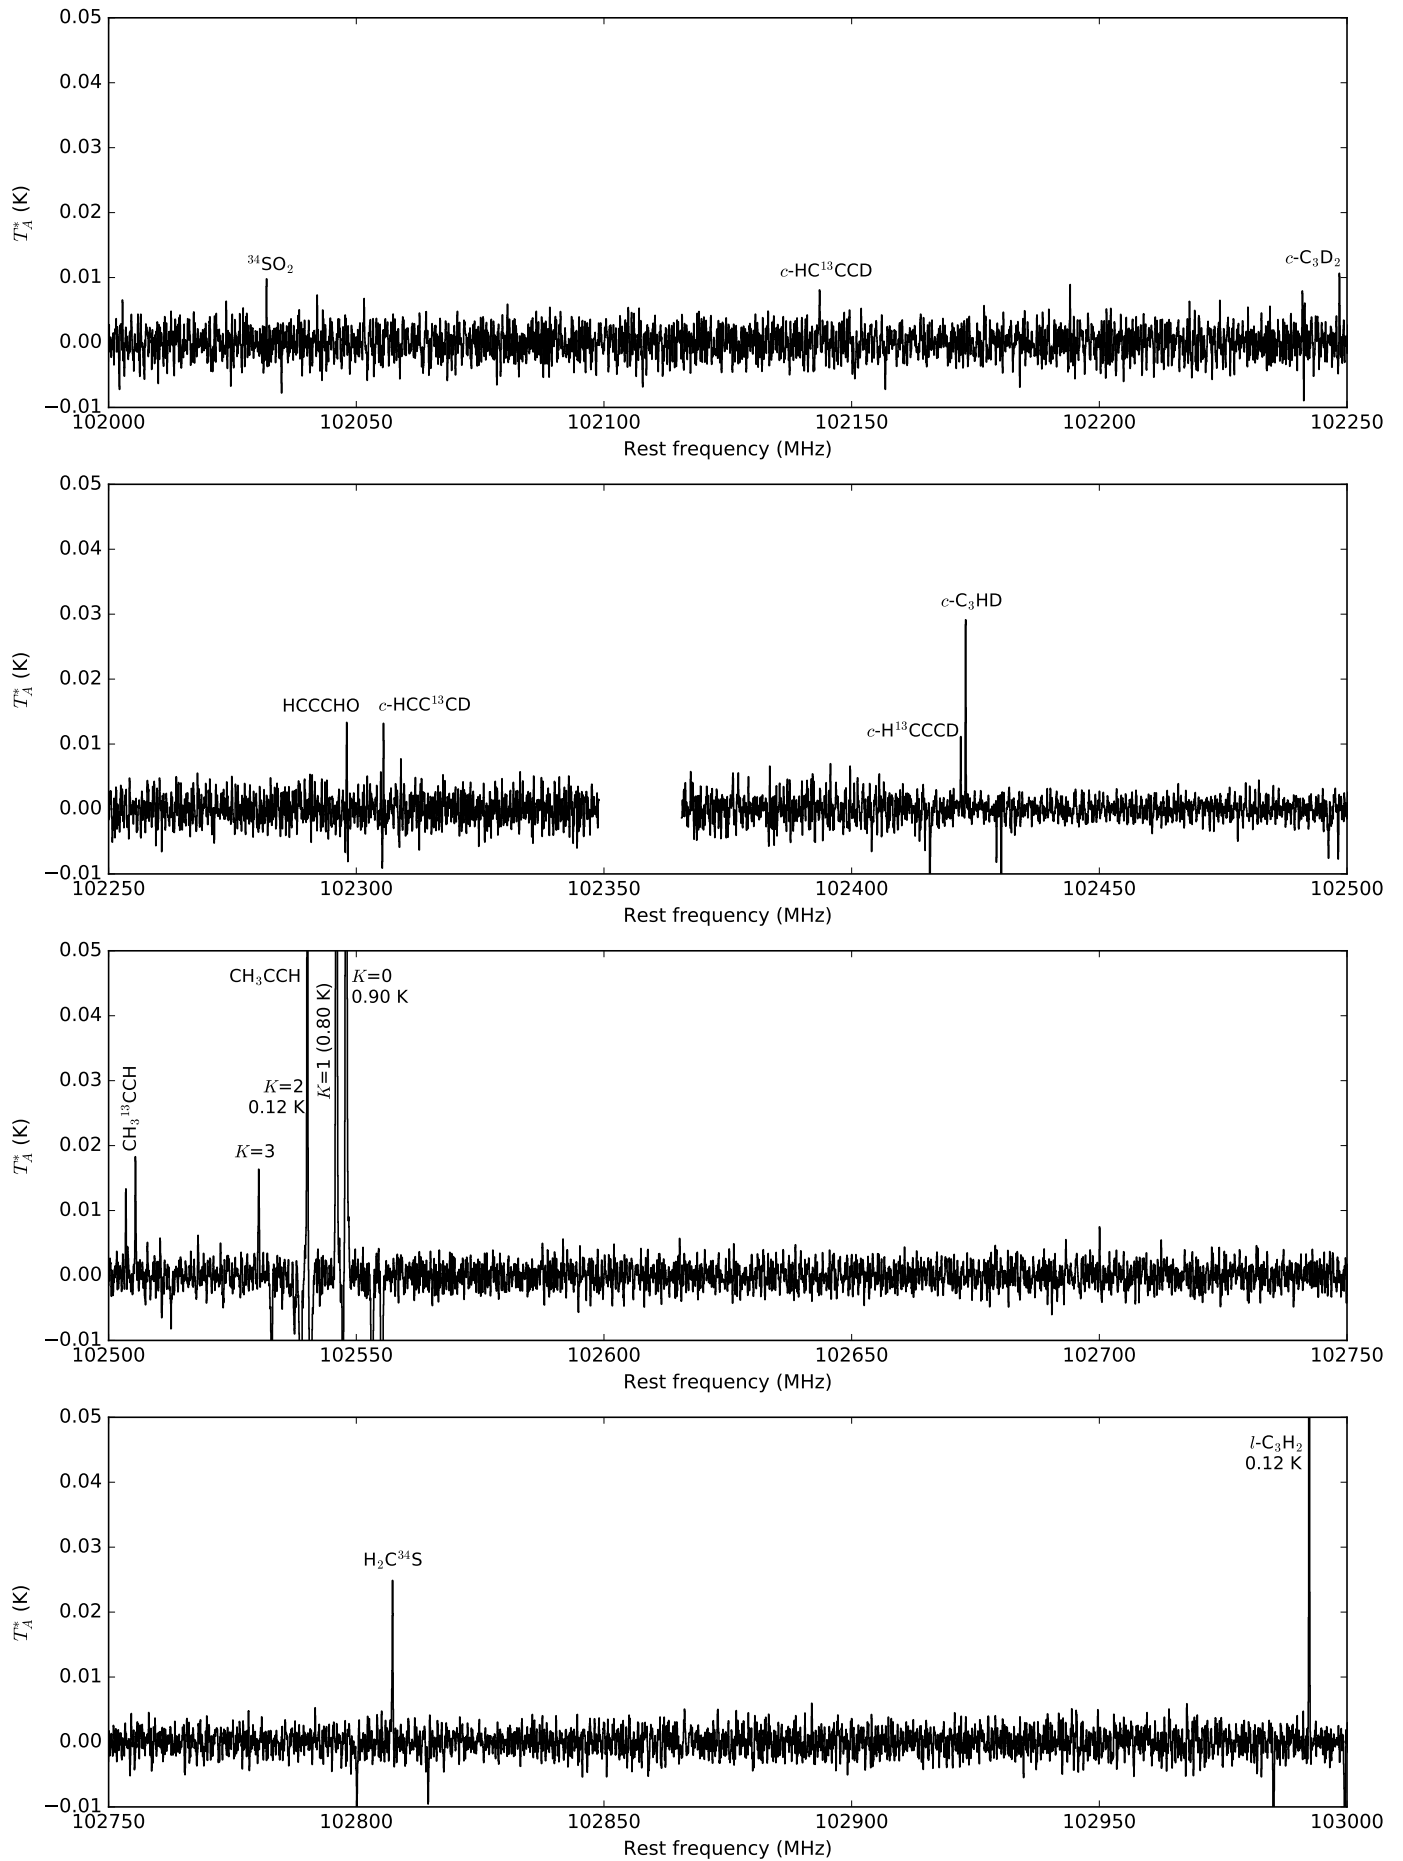

Fig. A.1. Continued

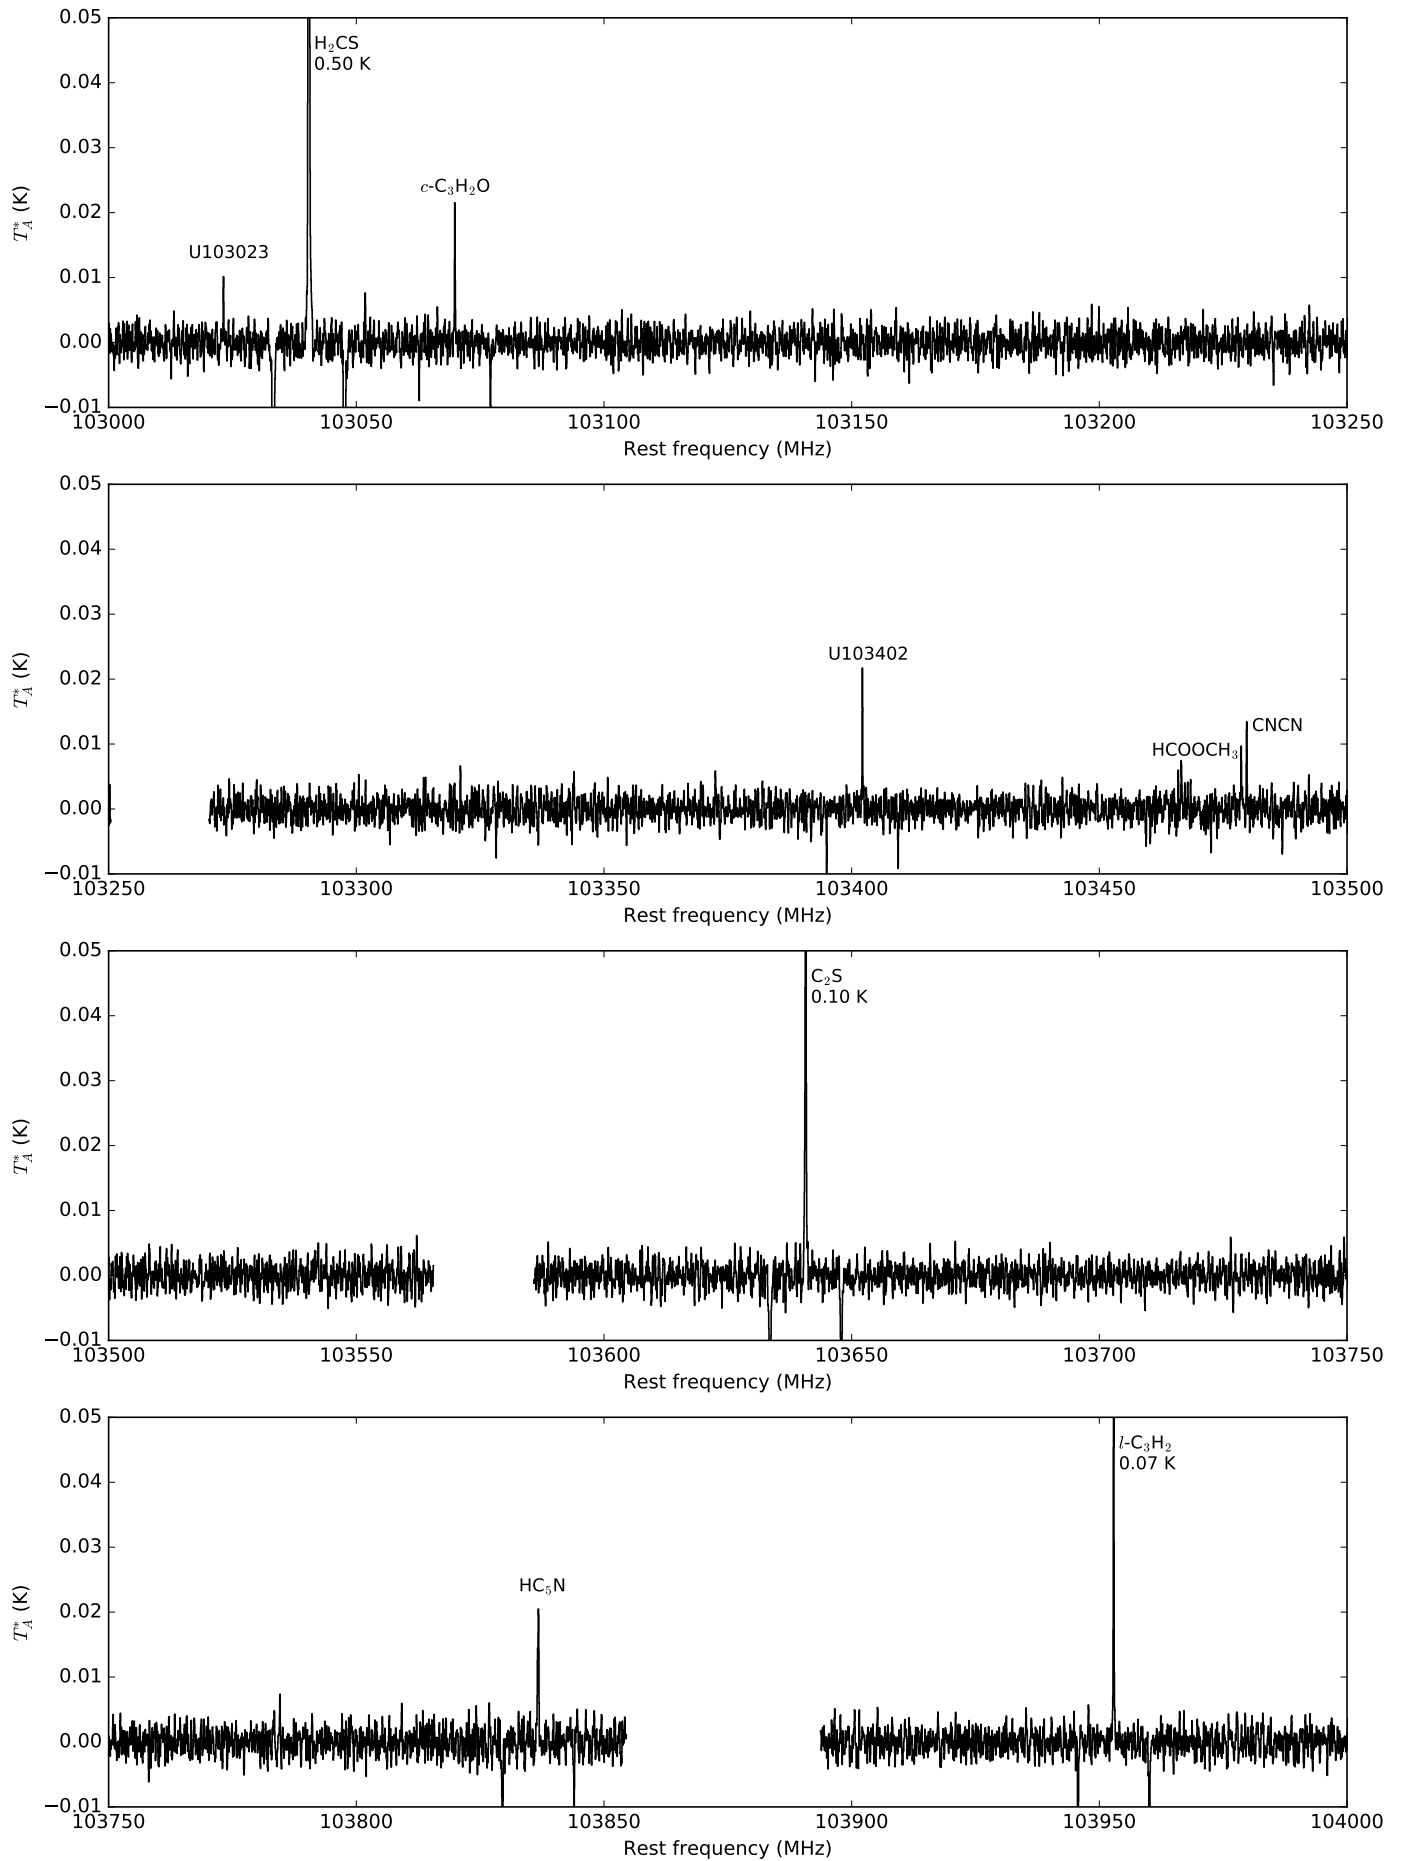

**Fig. A.1.** Continued  
Article number, page 58 of 70

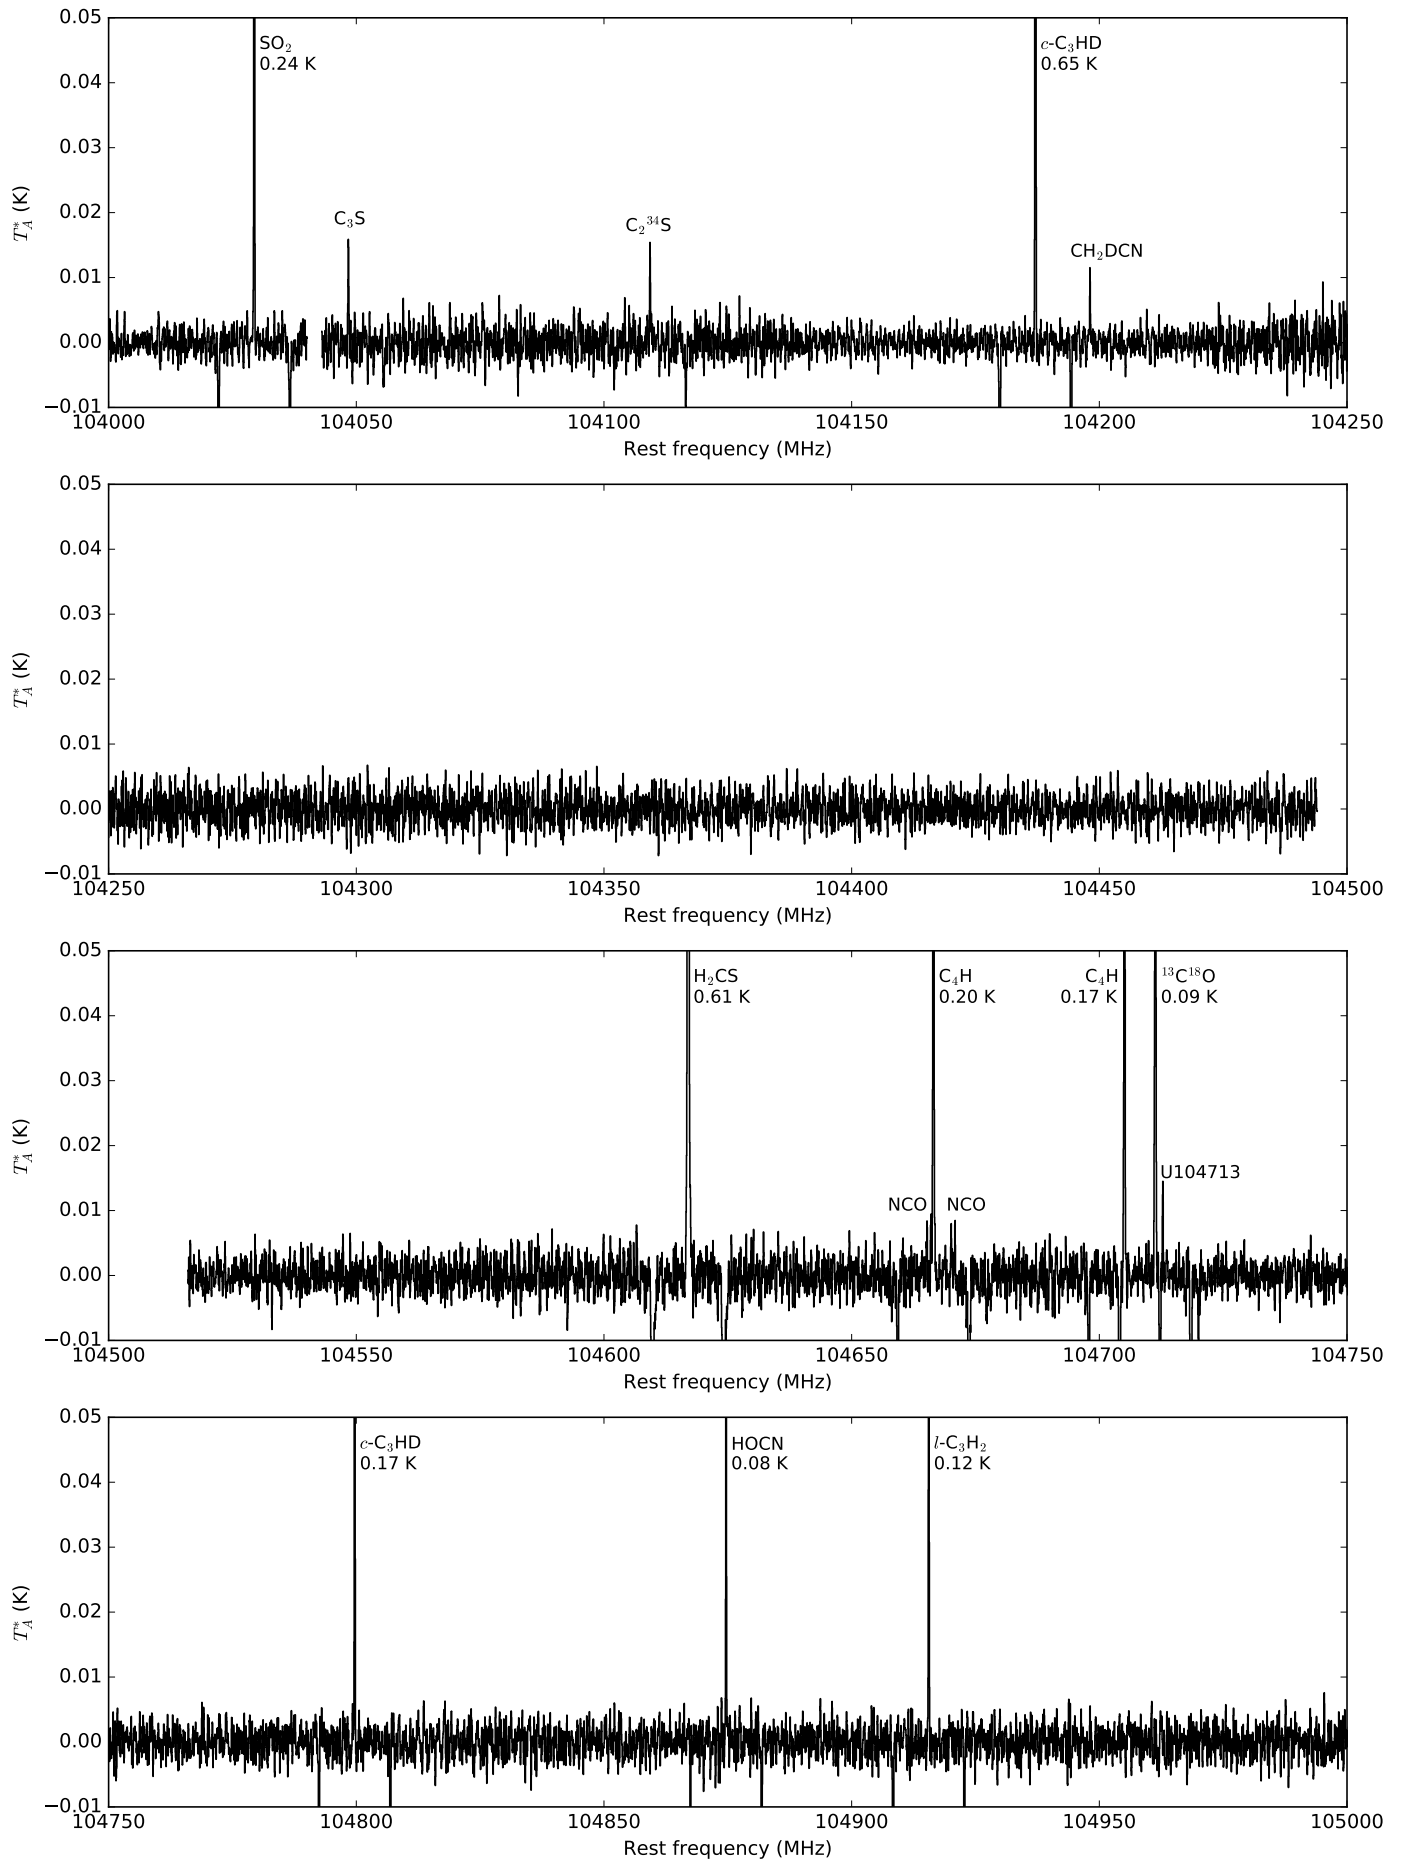

Fig. A.1. Continued

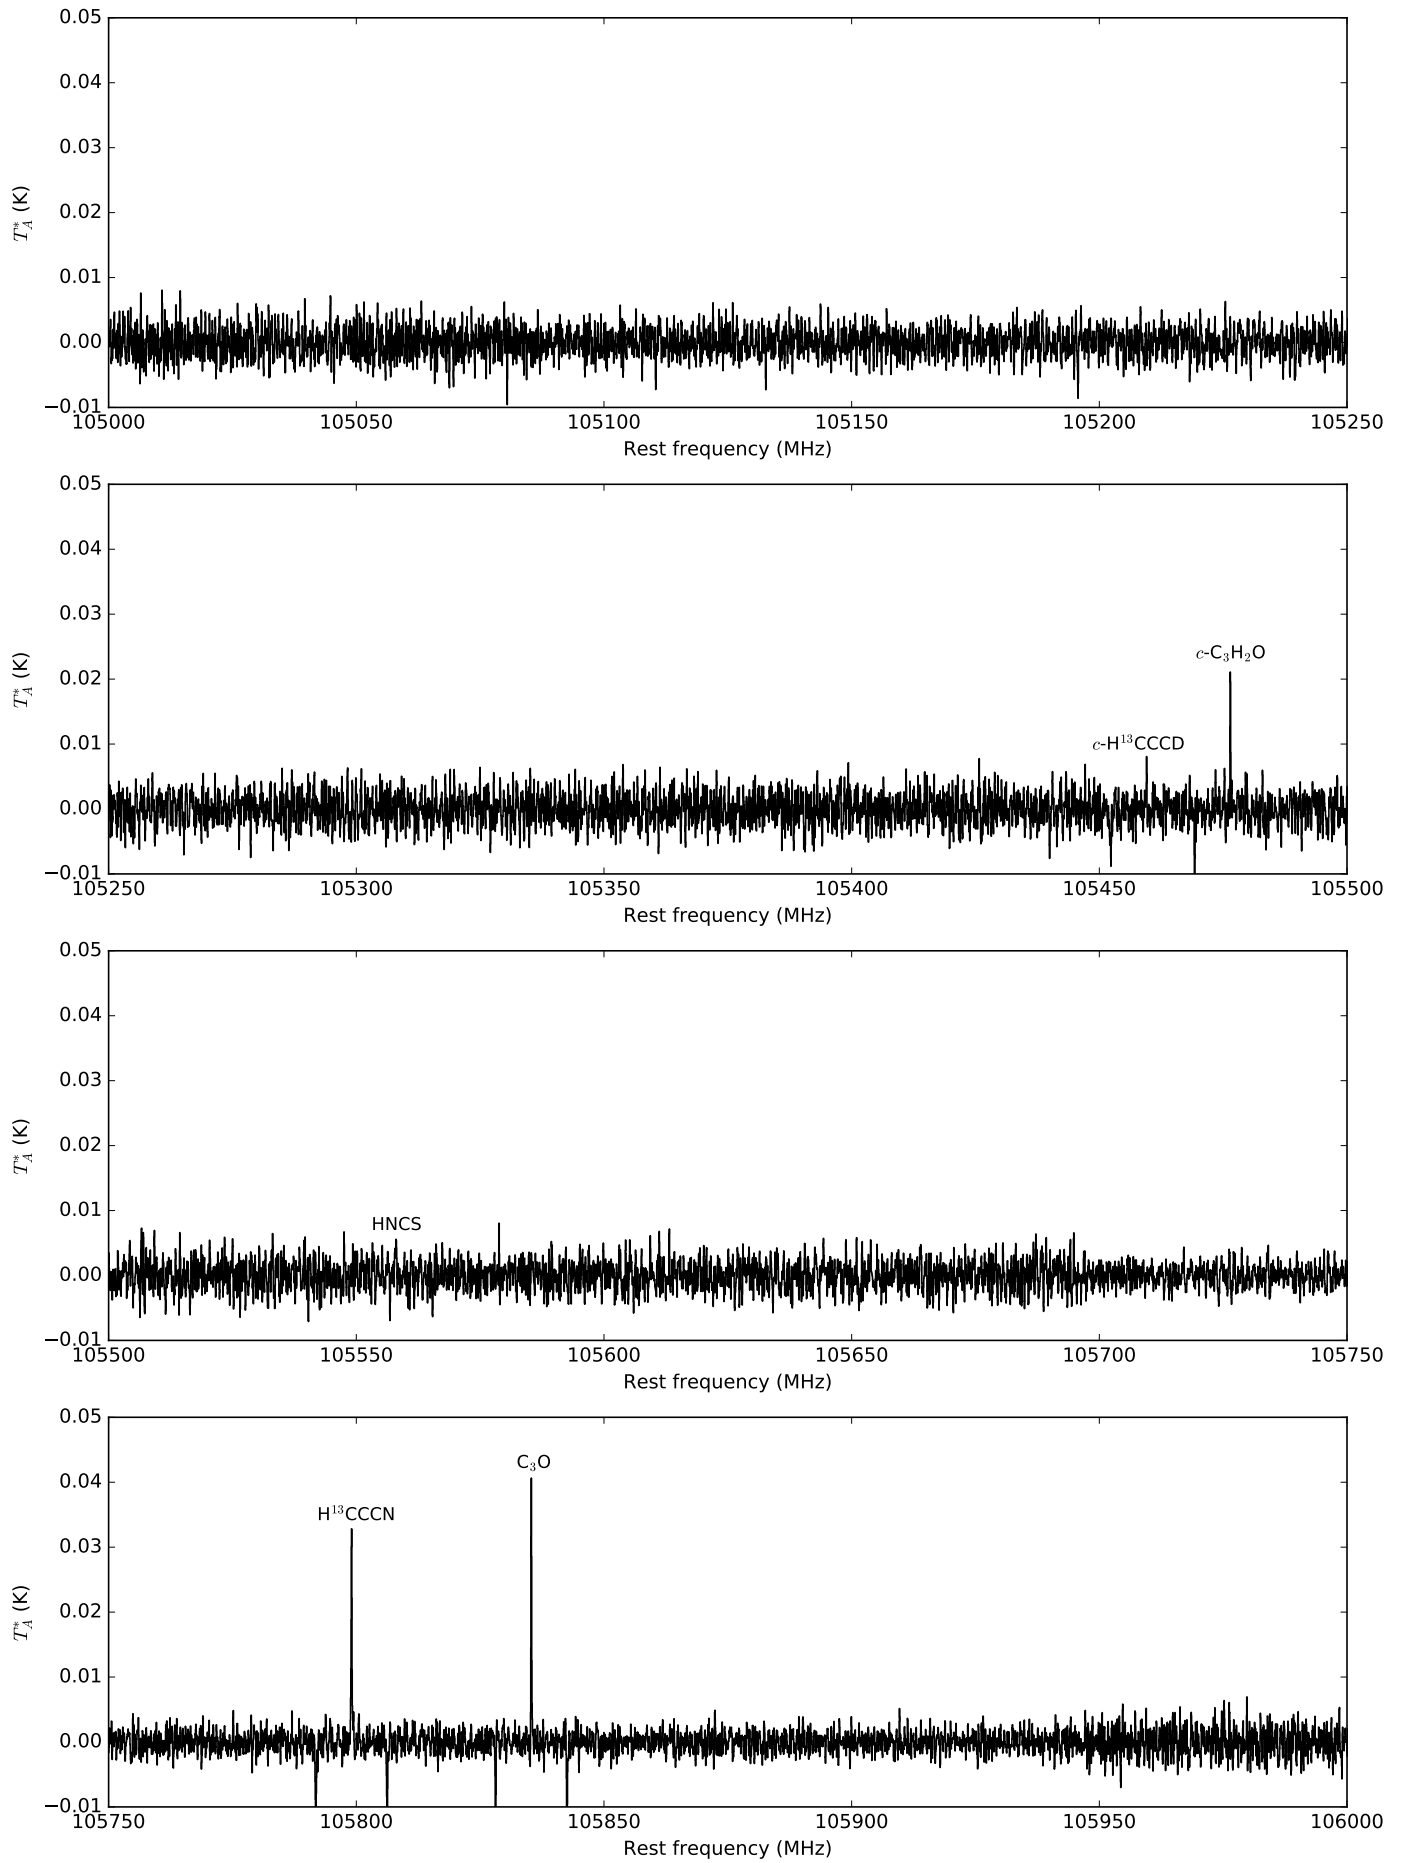

**Fig. A.1.** Continued  
Article number, page 60 of 70

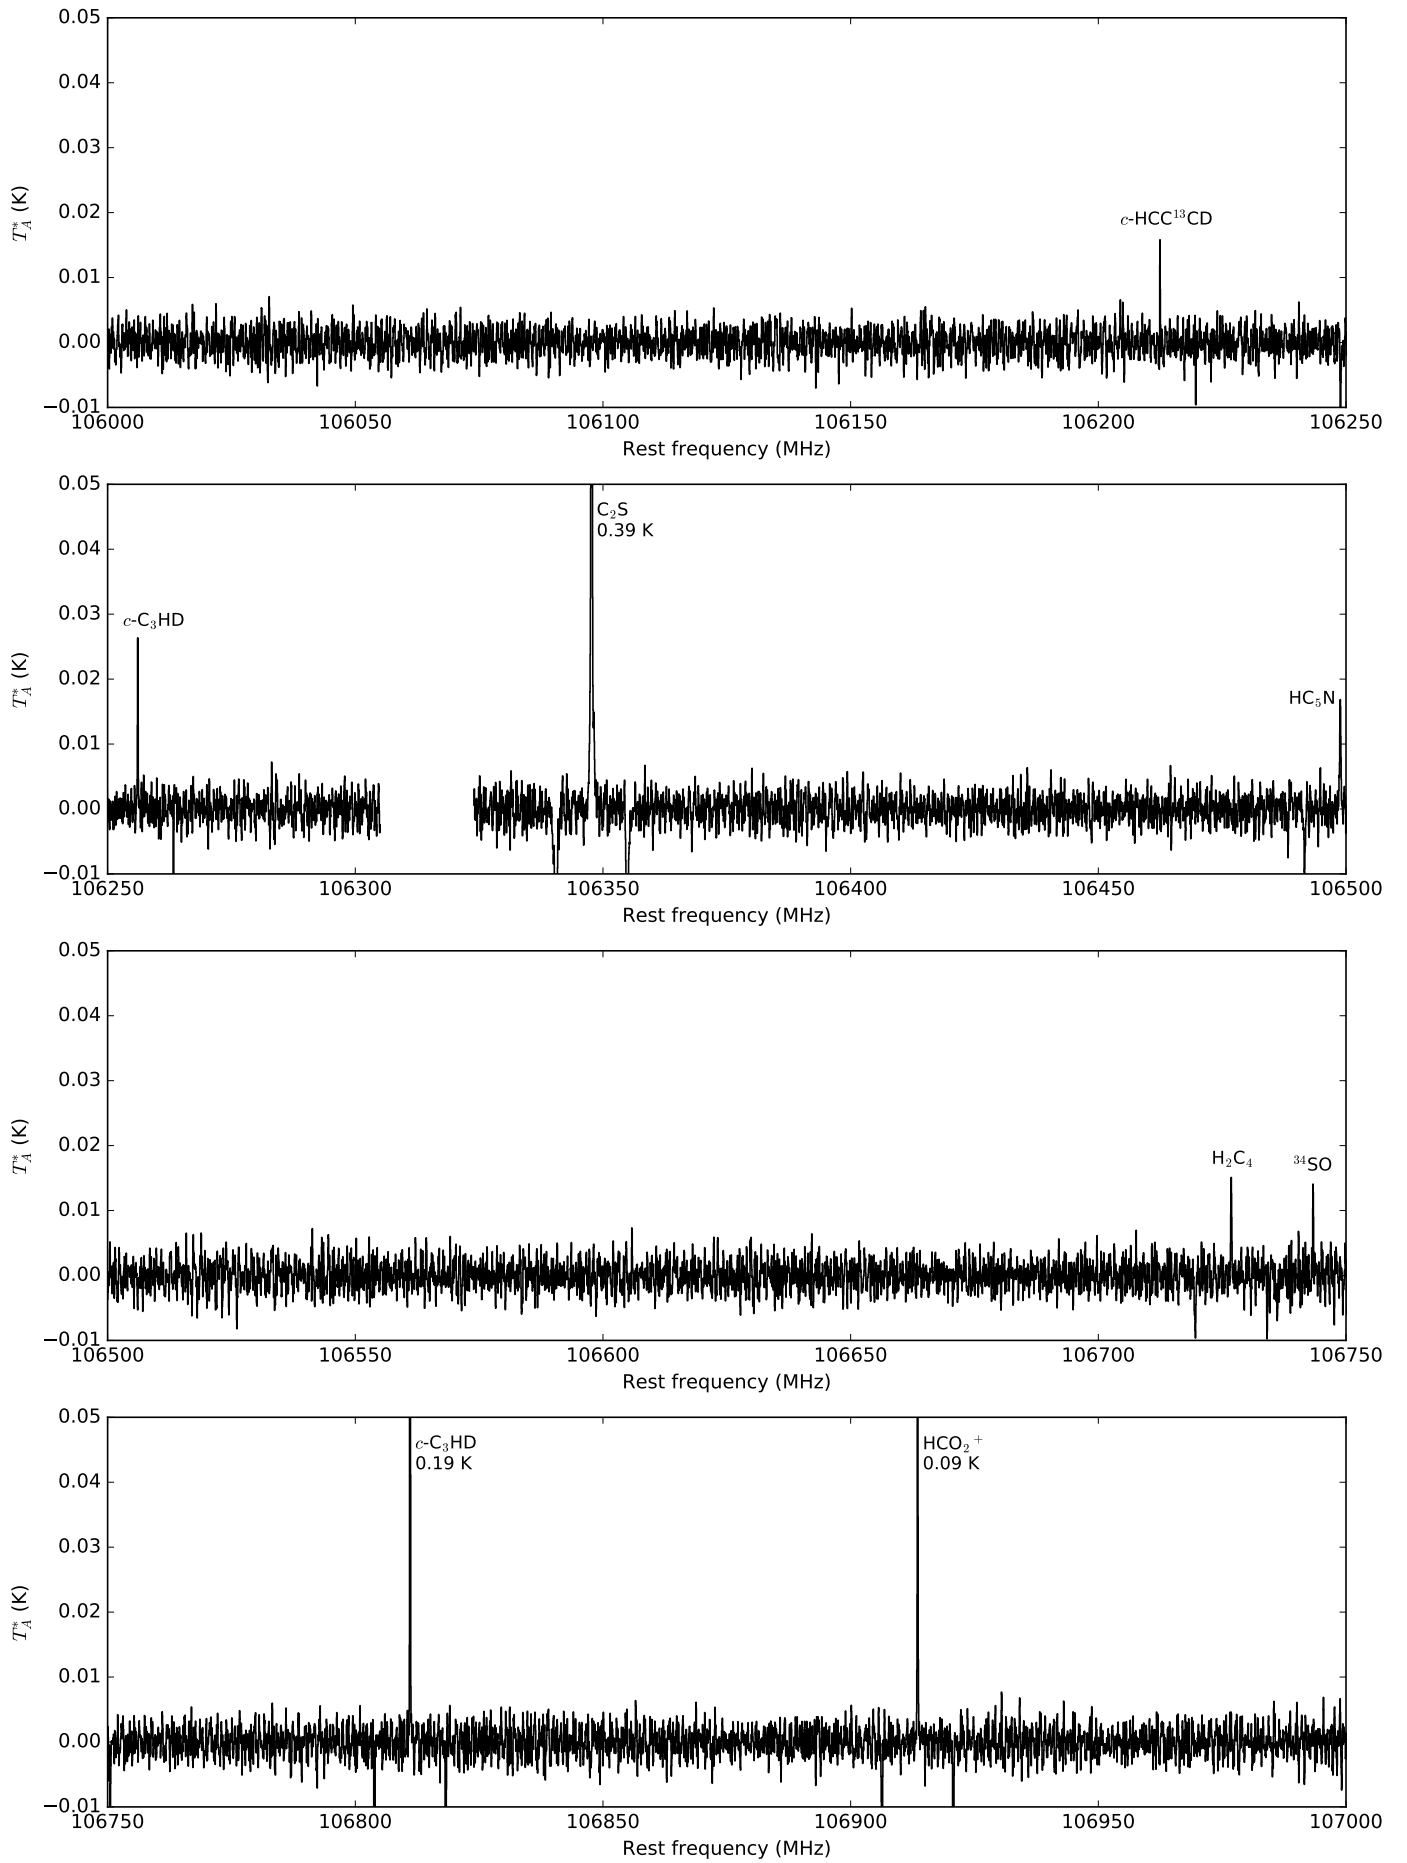

Fig. A.1. Continued

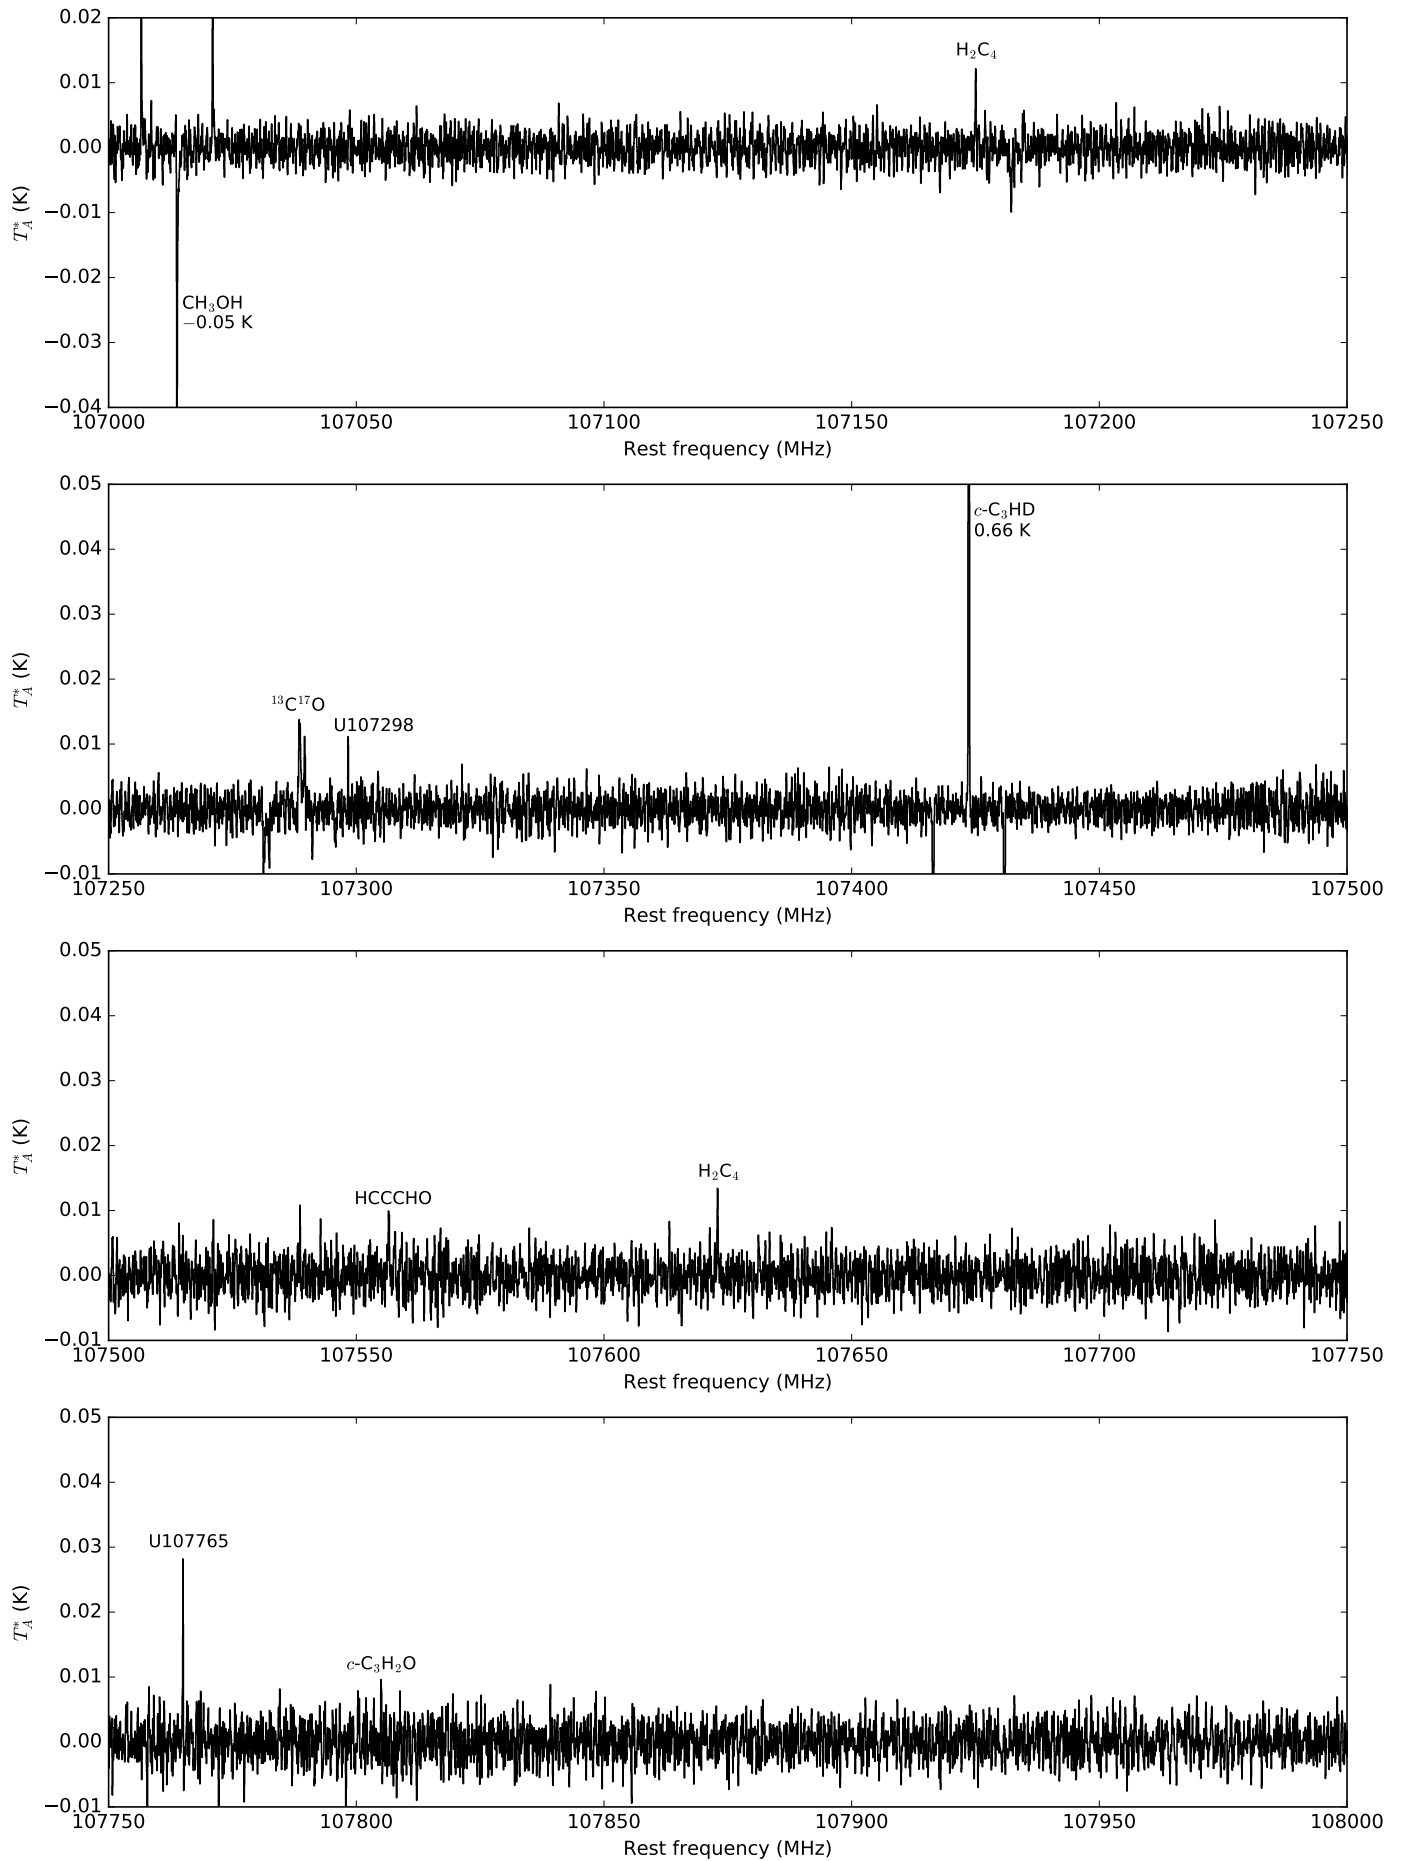

**Fig. A.1.** Continued  
Article number, page 62 of 70

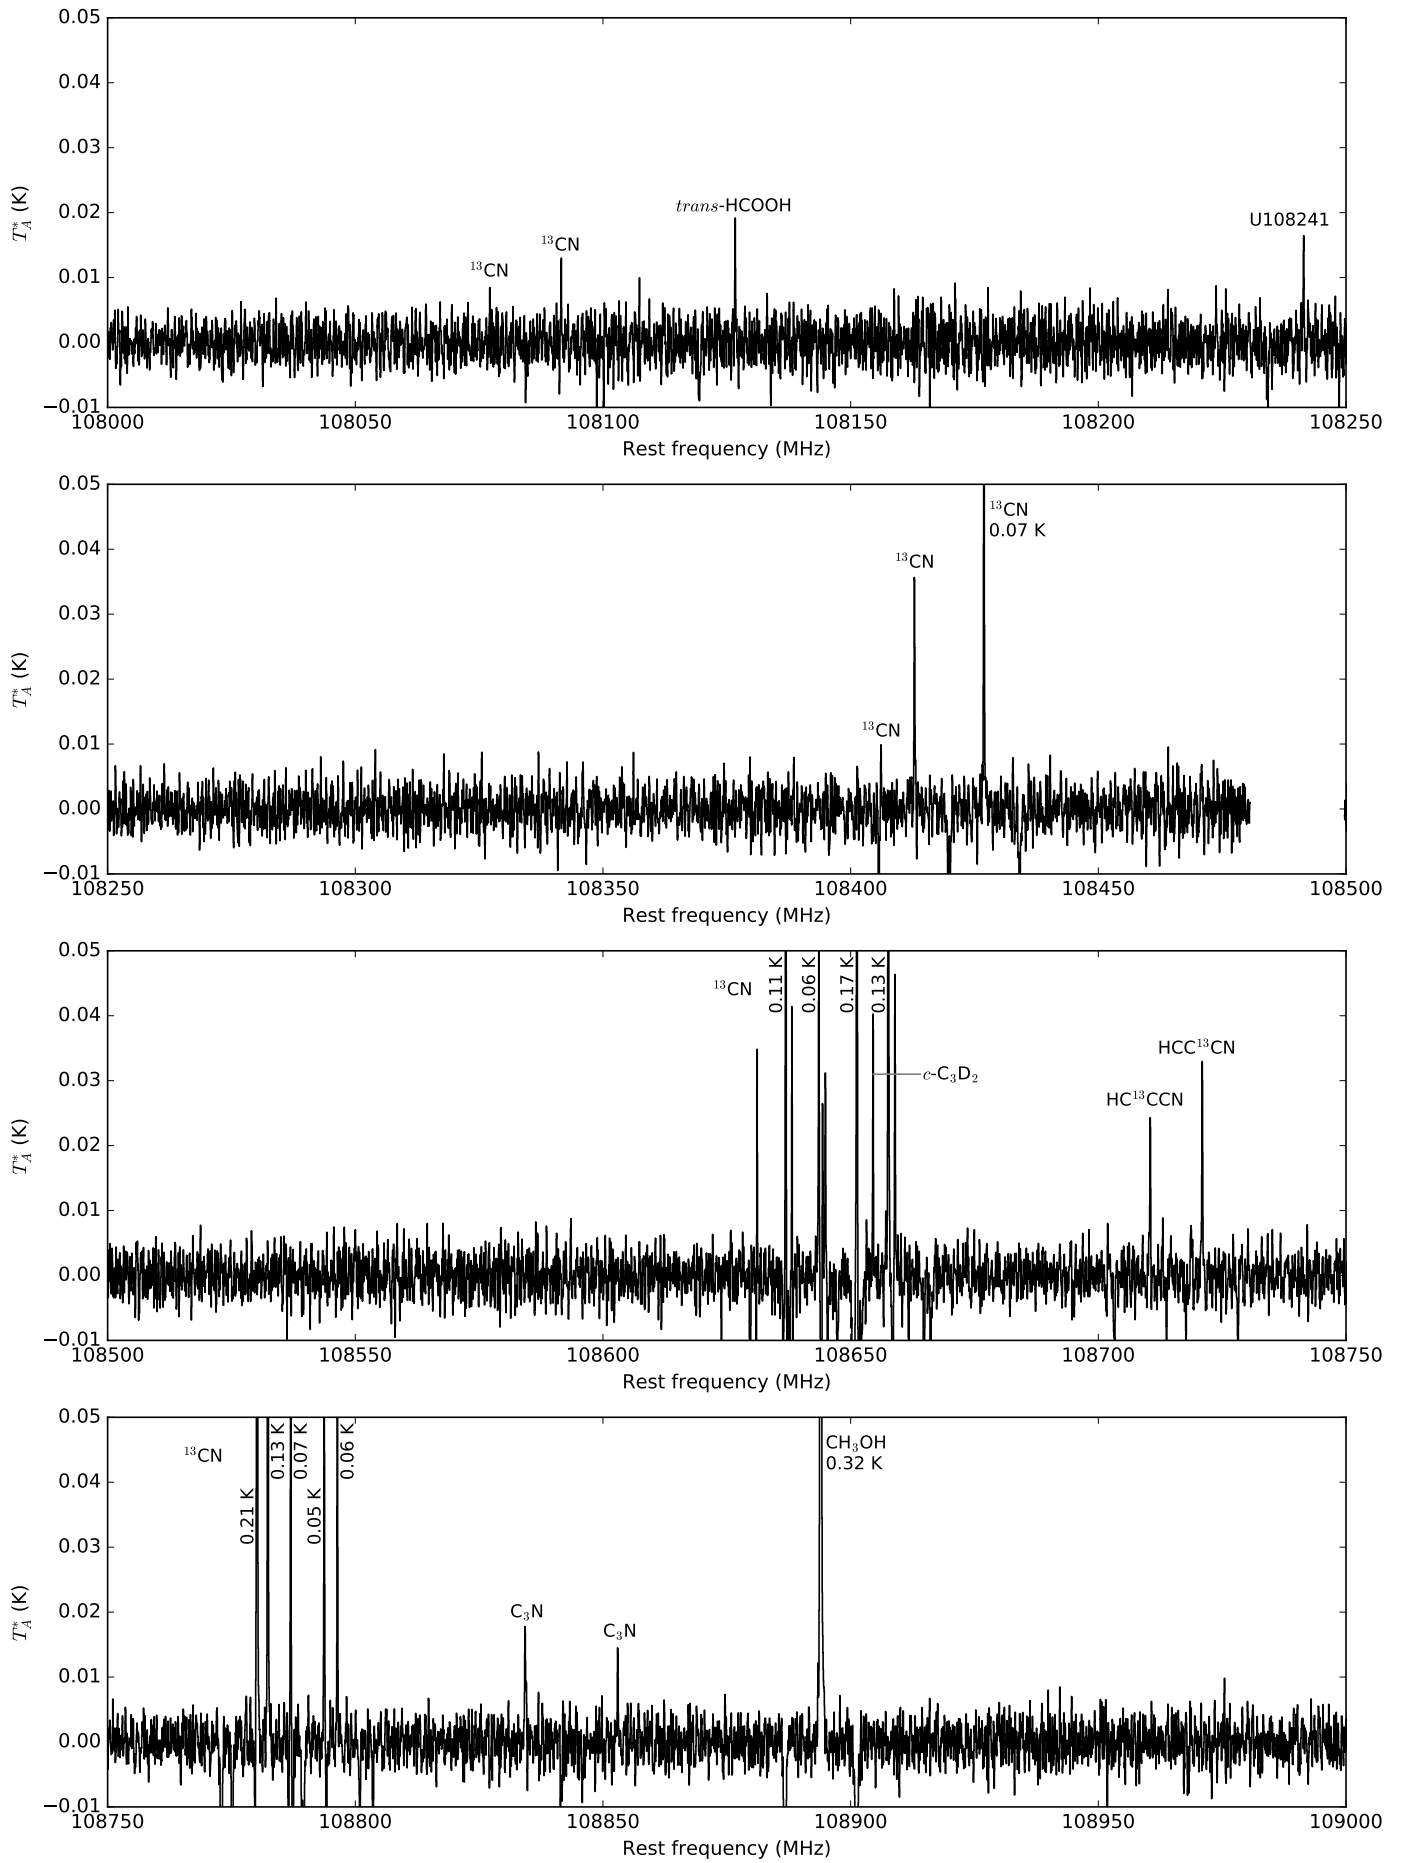

Fig. A.1. Continued



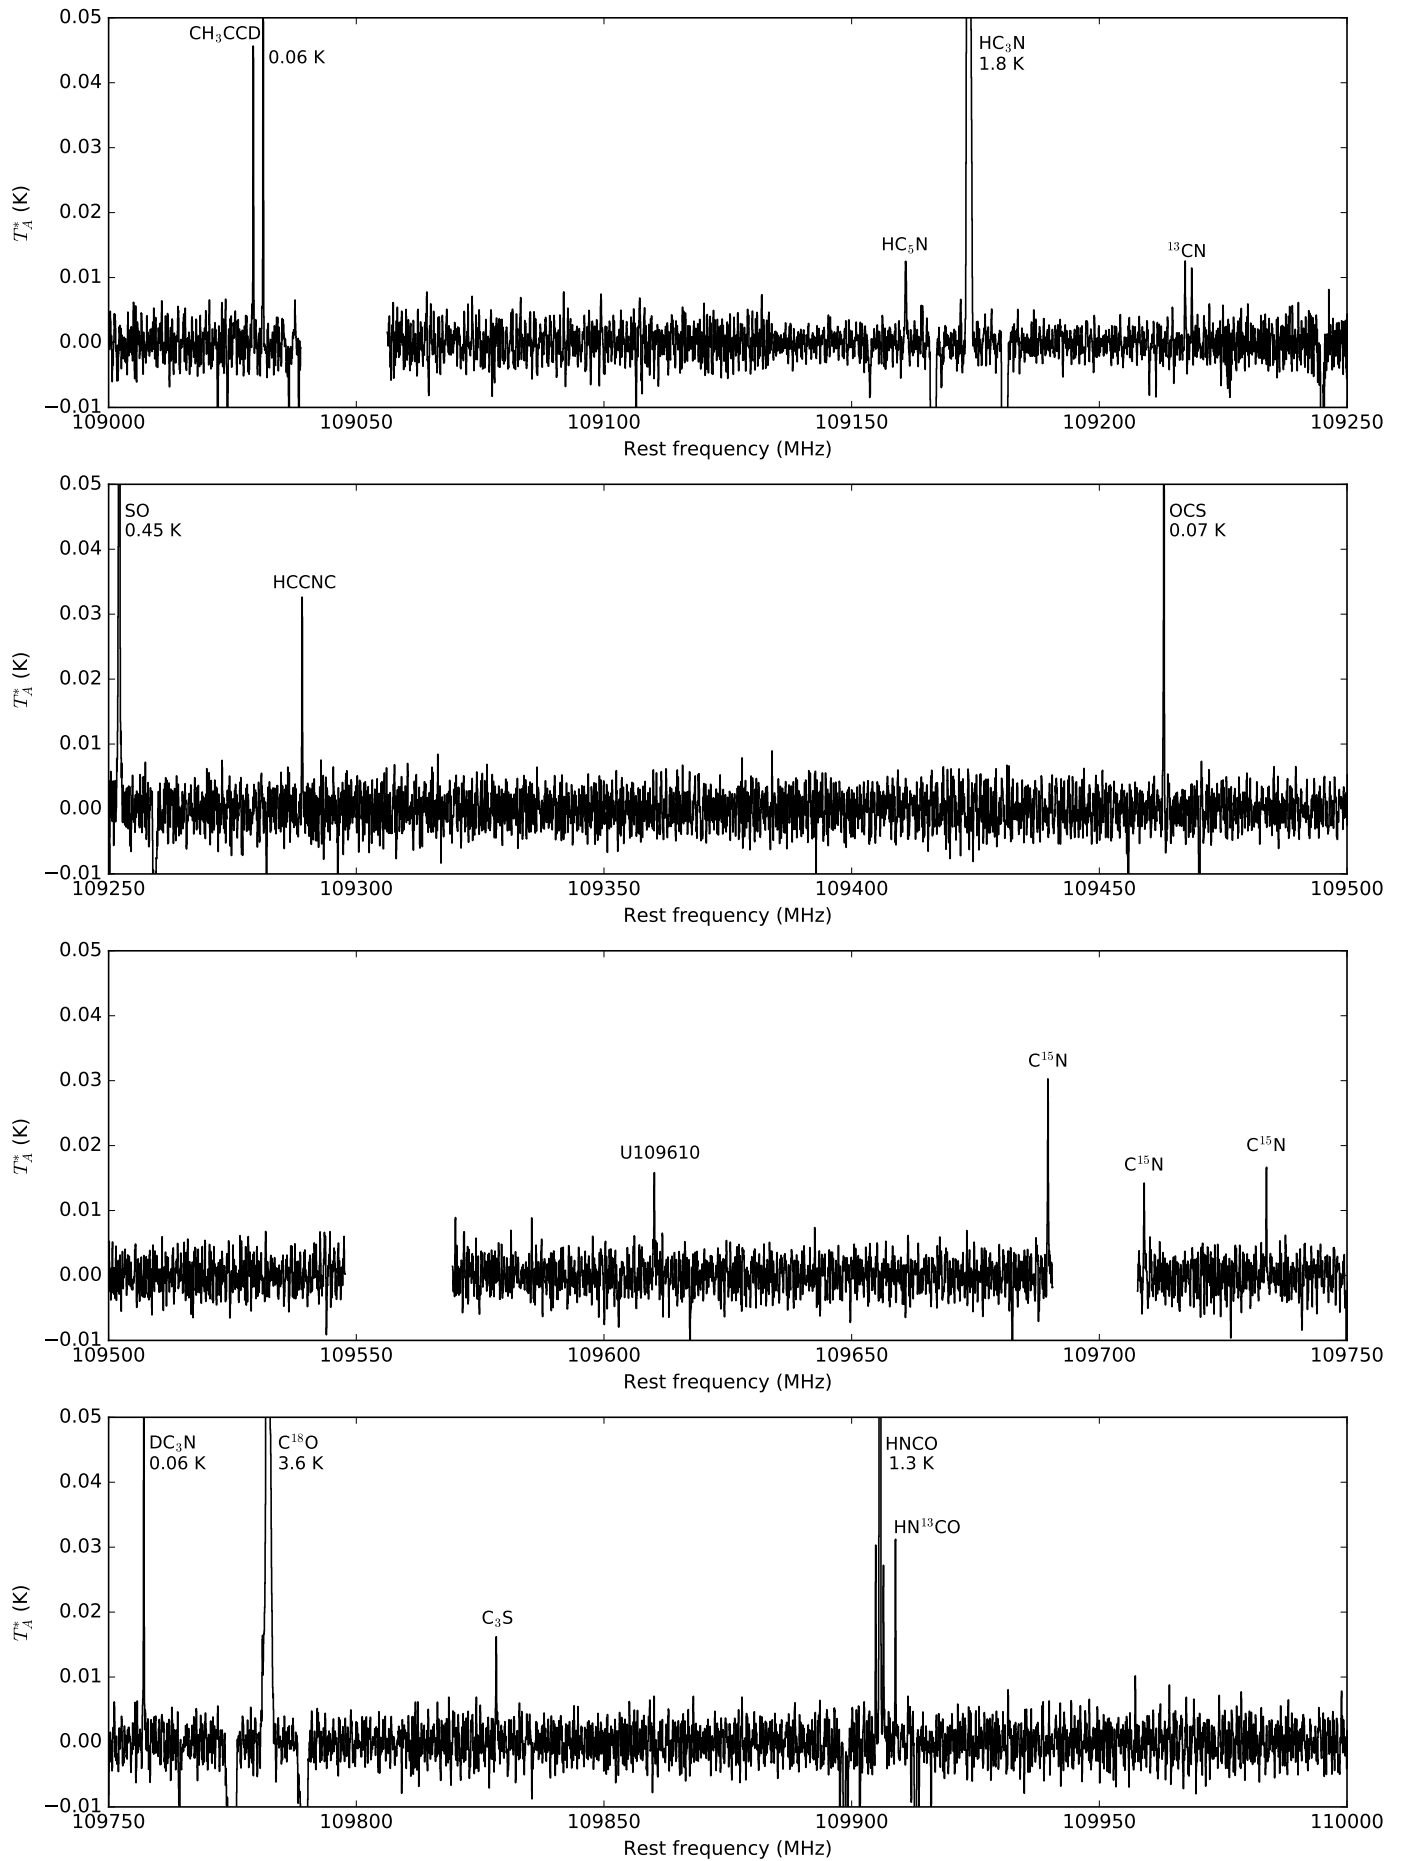

**Fig. A.1.** Continued  
Article number, page 64 of 70

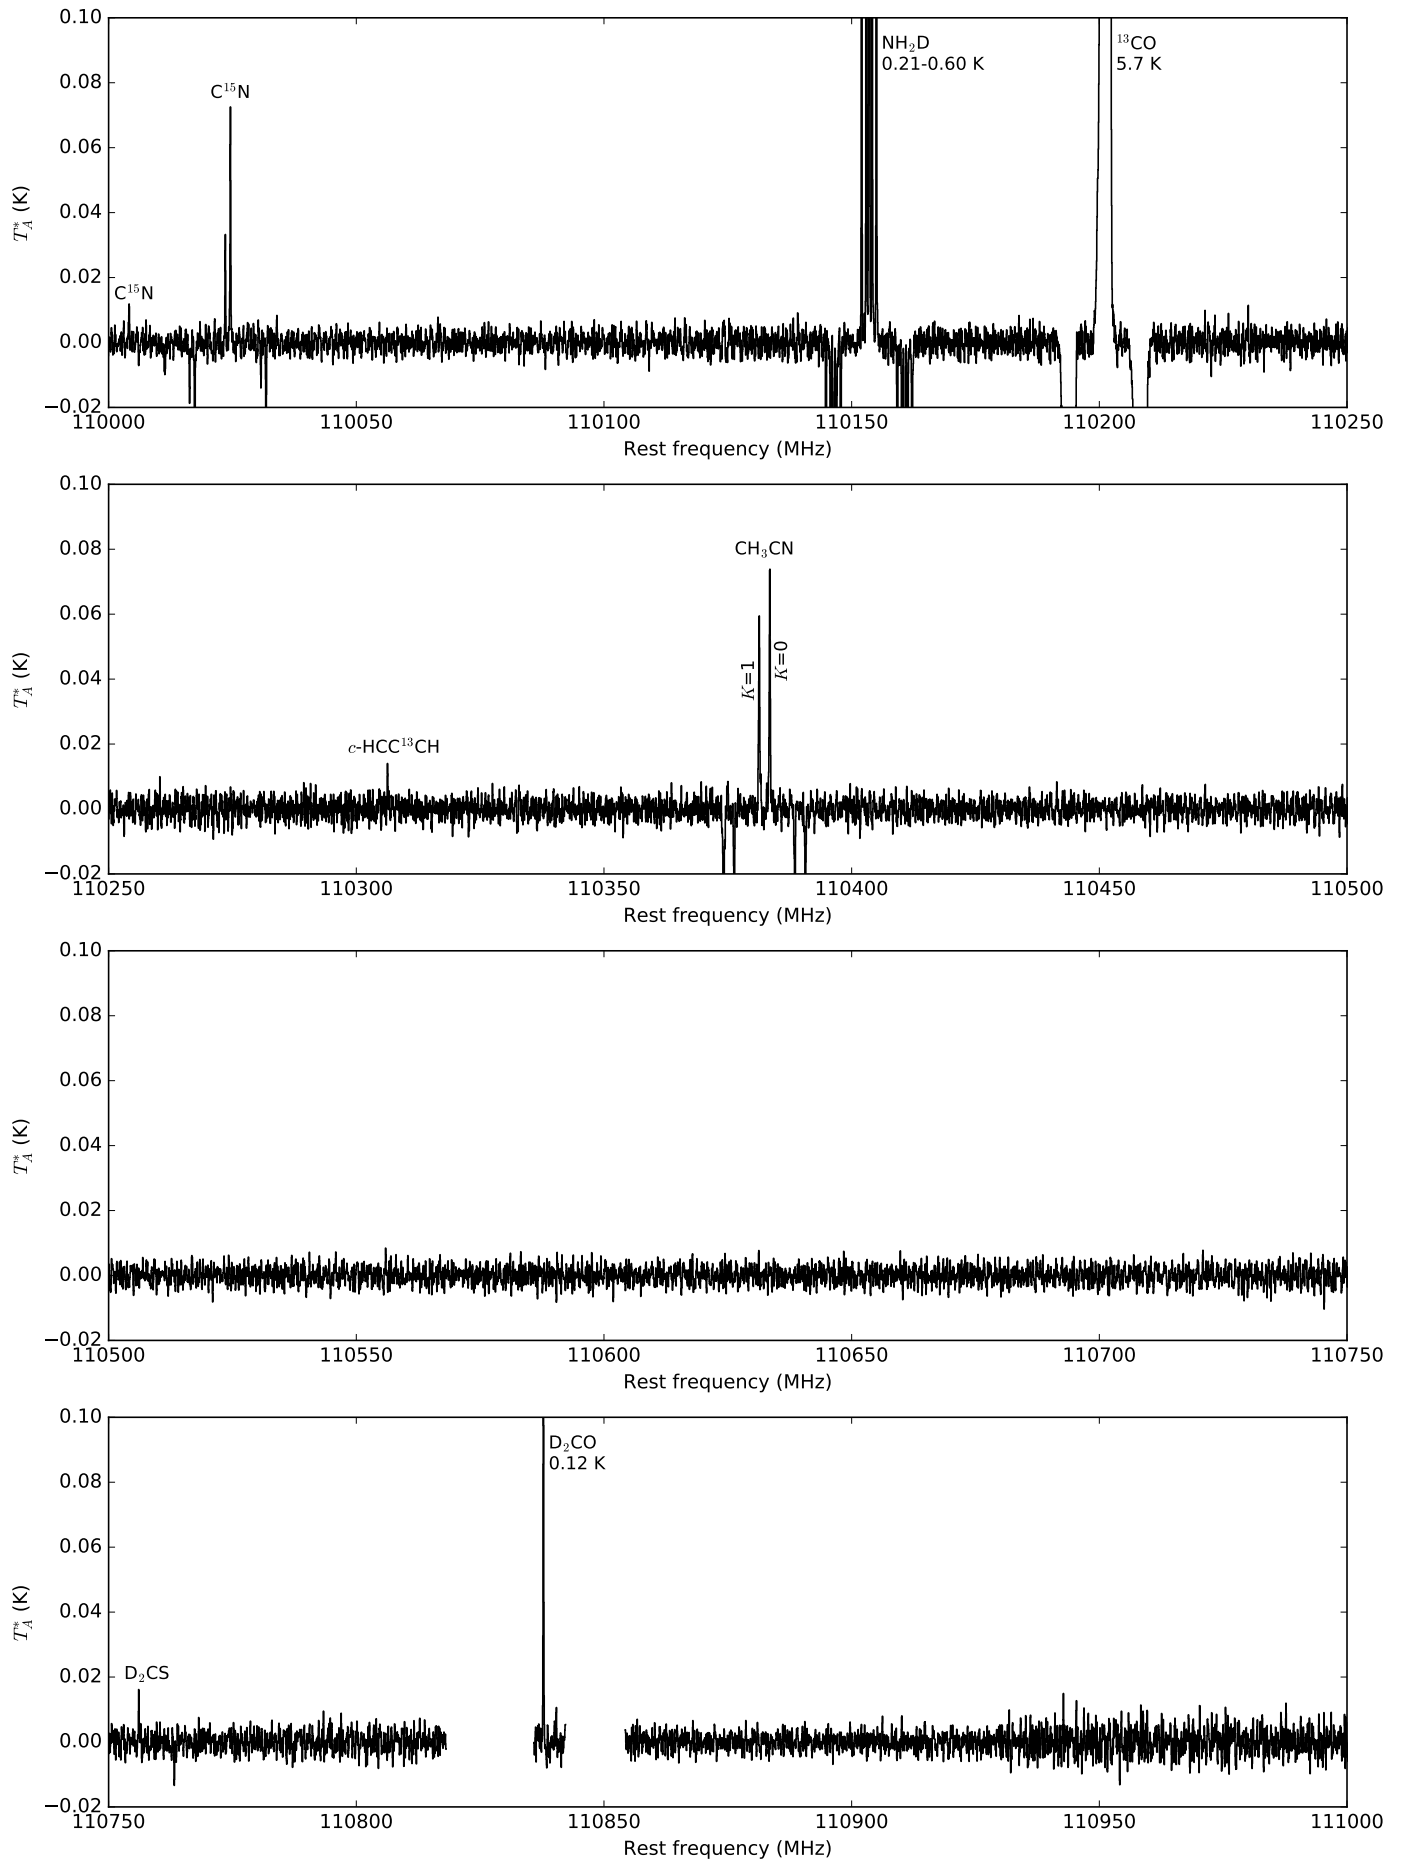

Fig. A.1. Continued

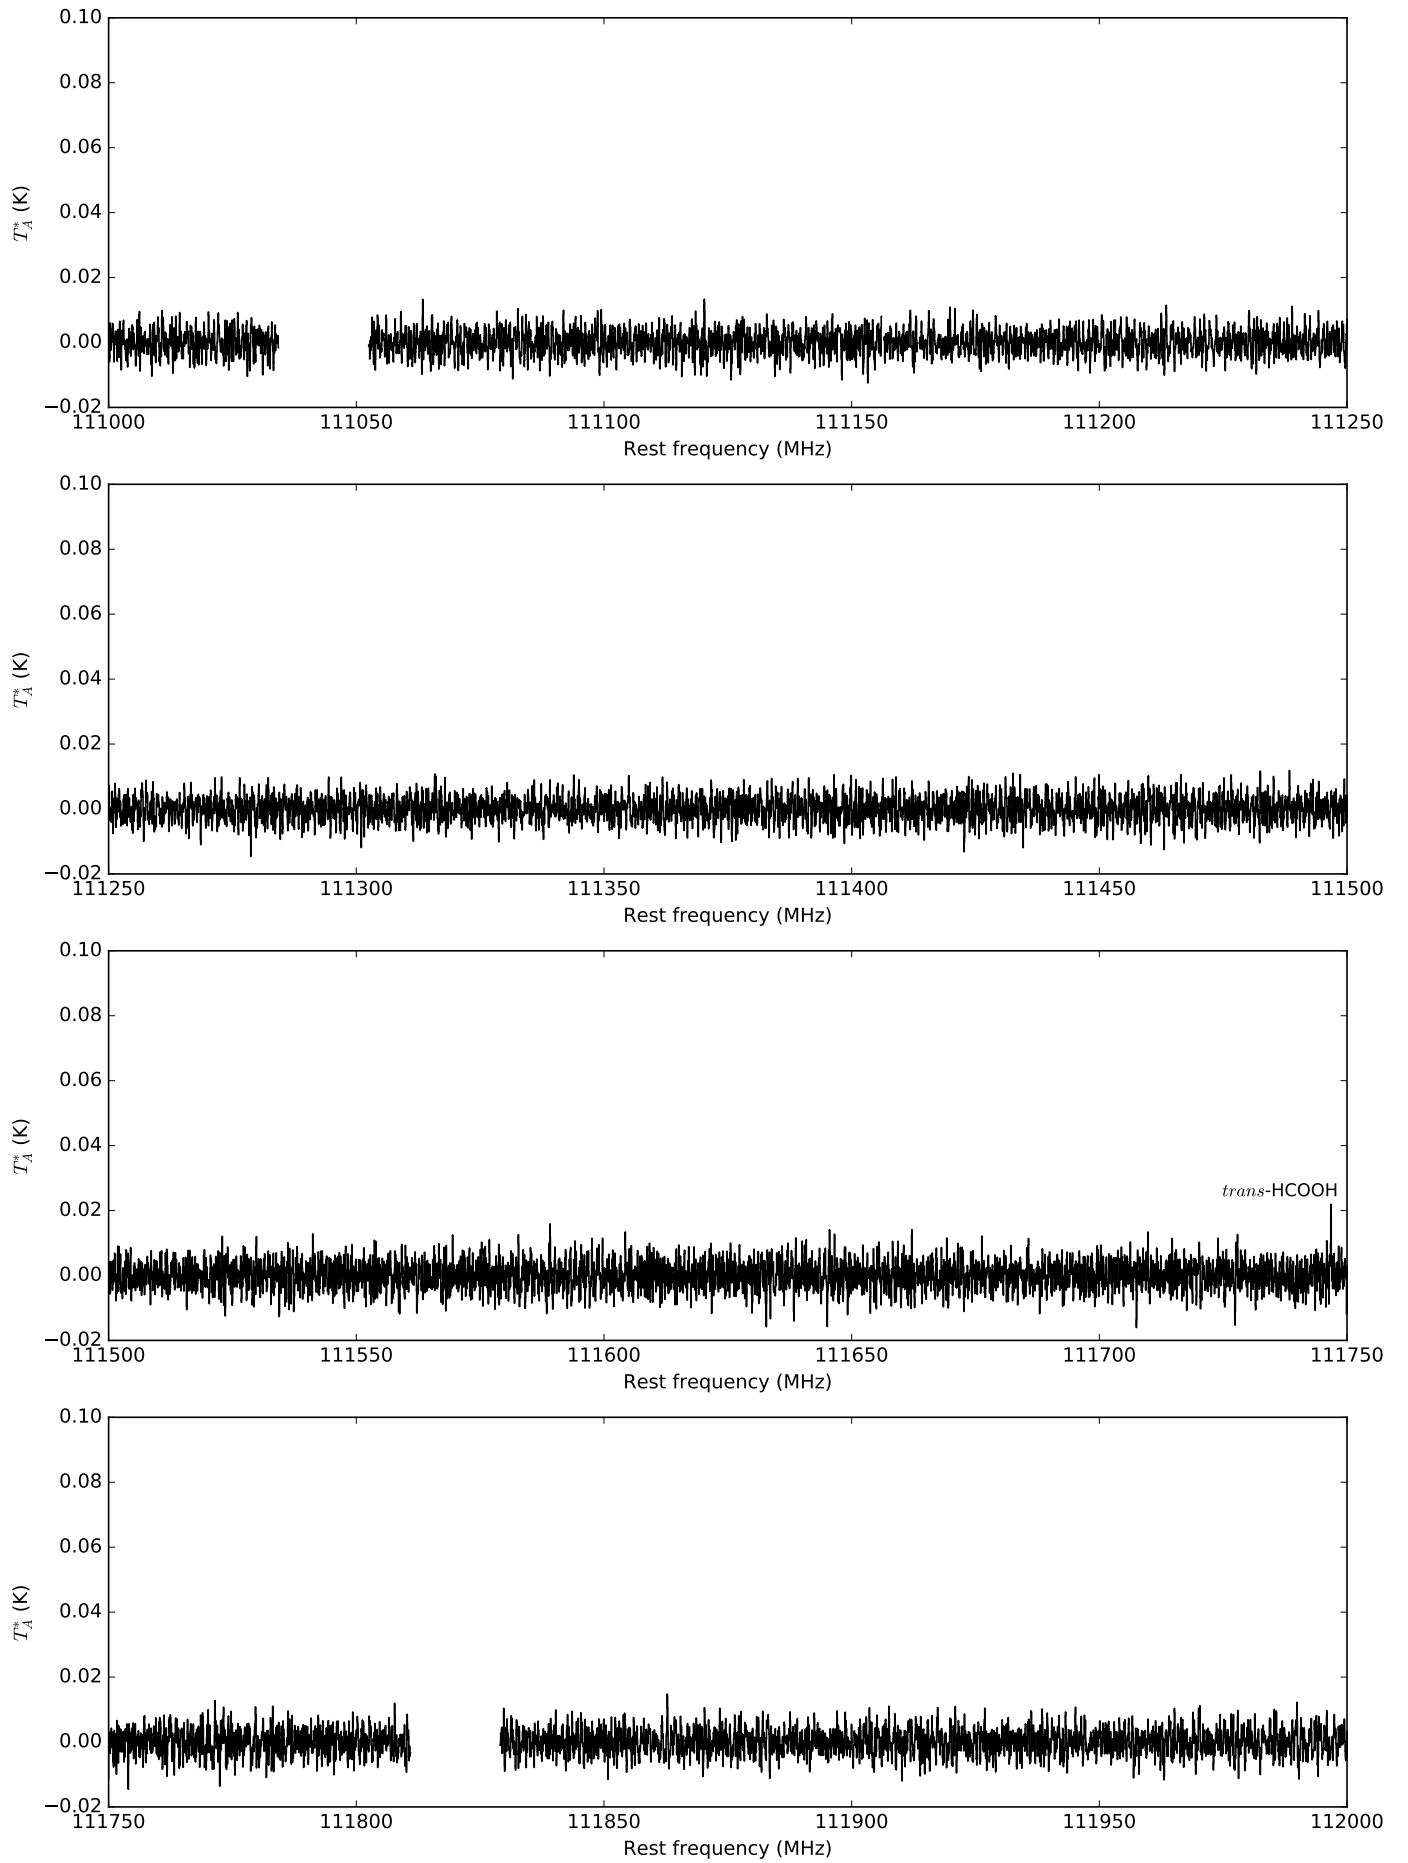

**Fig. A.1.** Continued  
Article number, page 66 of 70

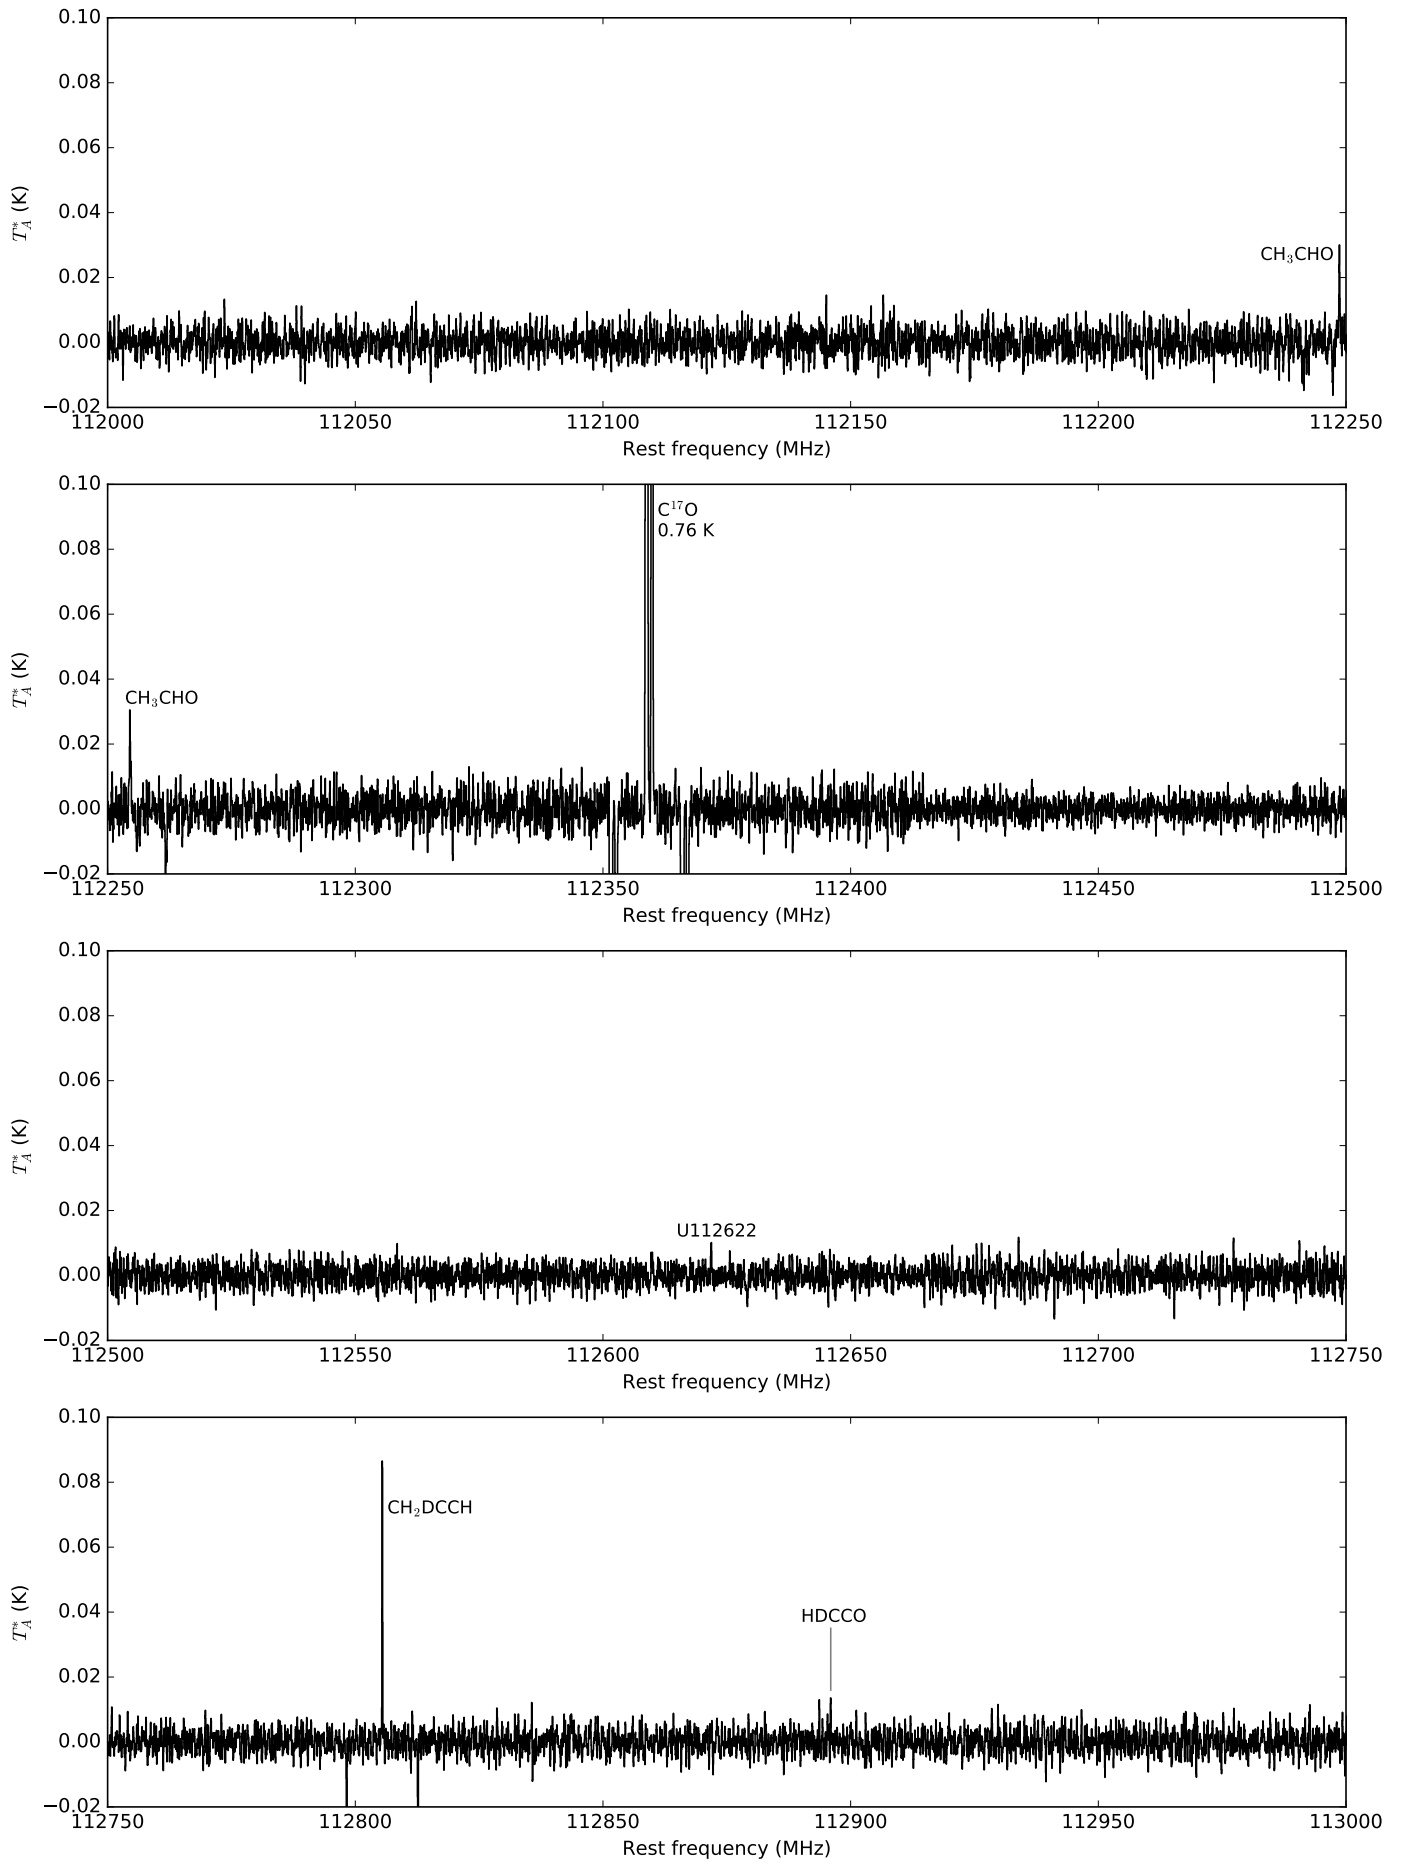

Fig. A.1. Continued

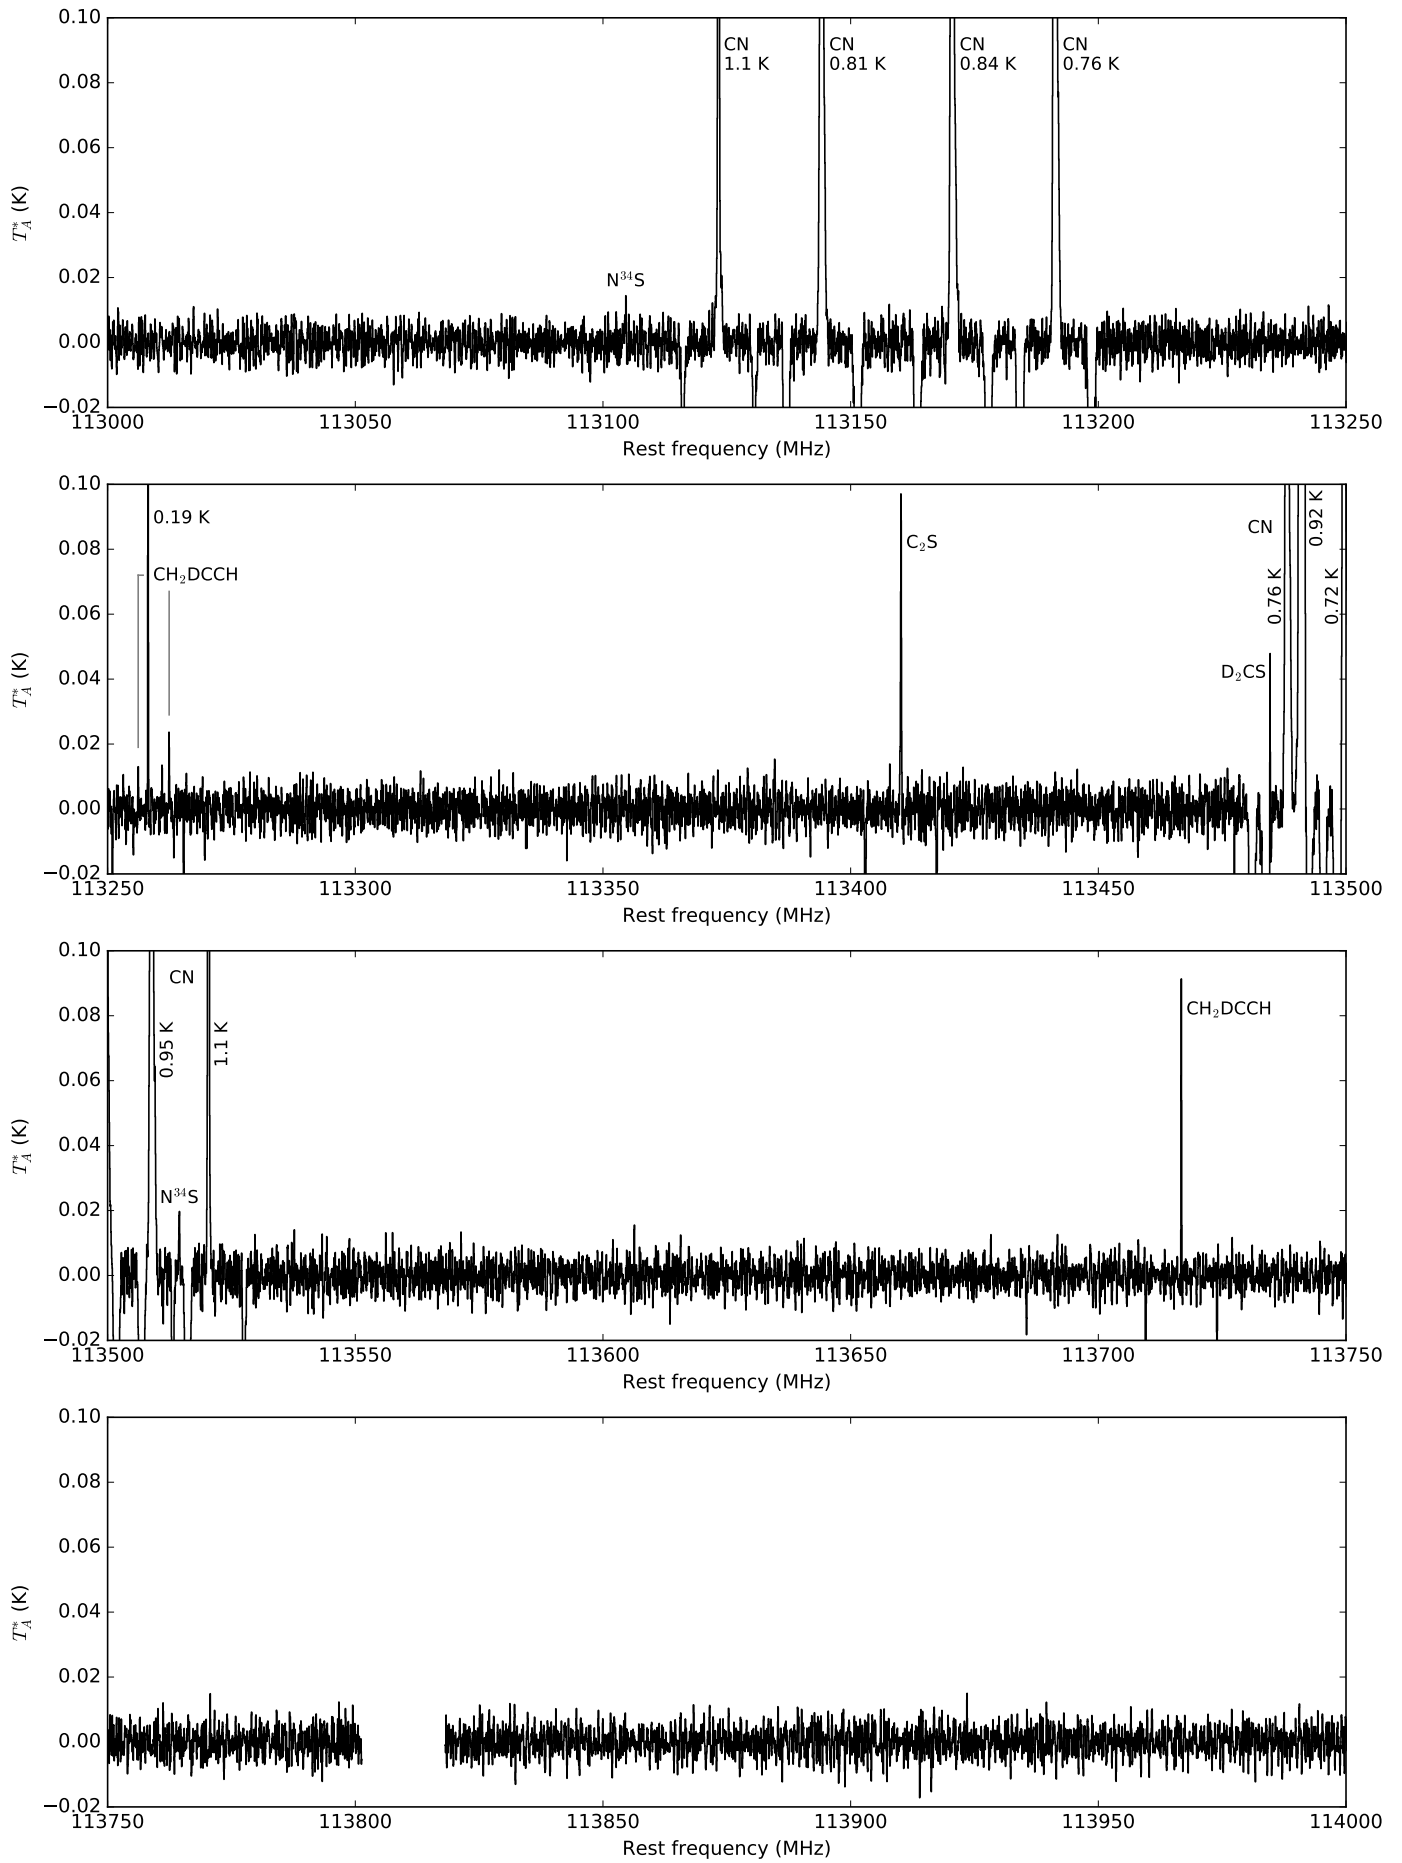

**Fig. A.1.** Continued  
Article number, page 68 of 70

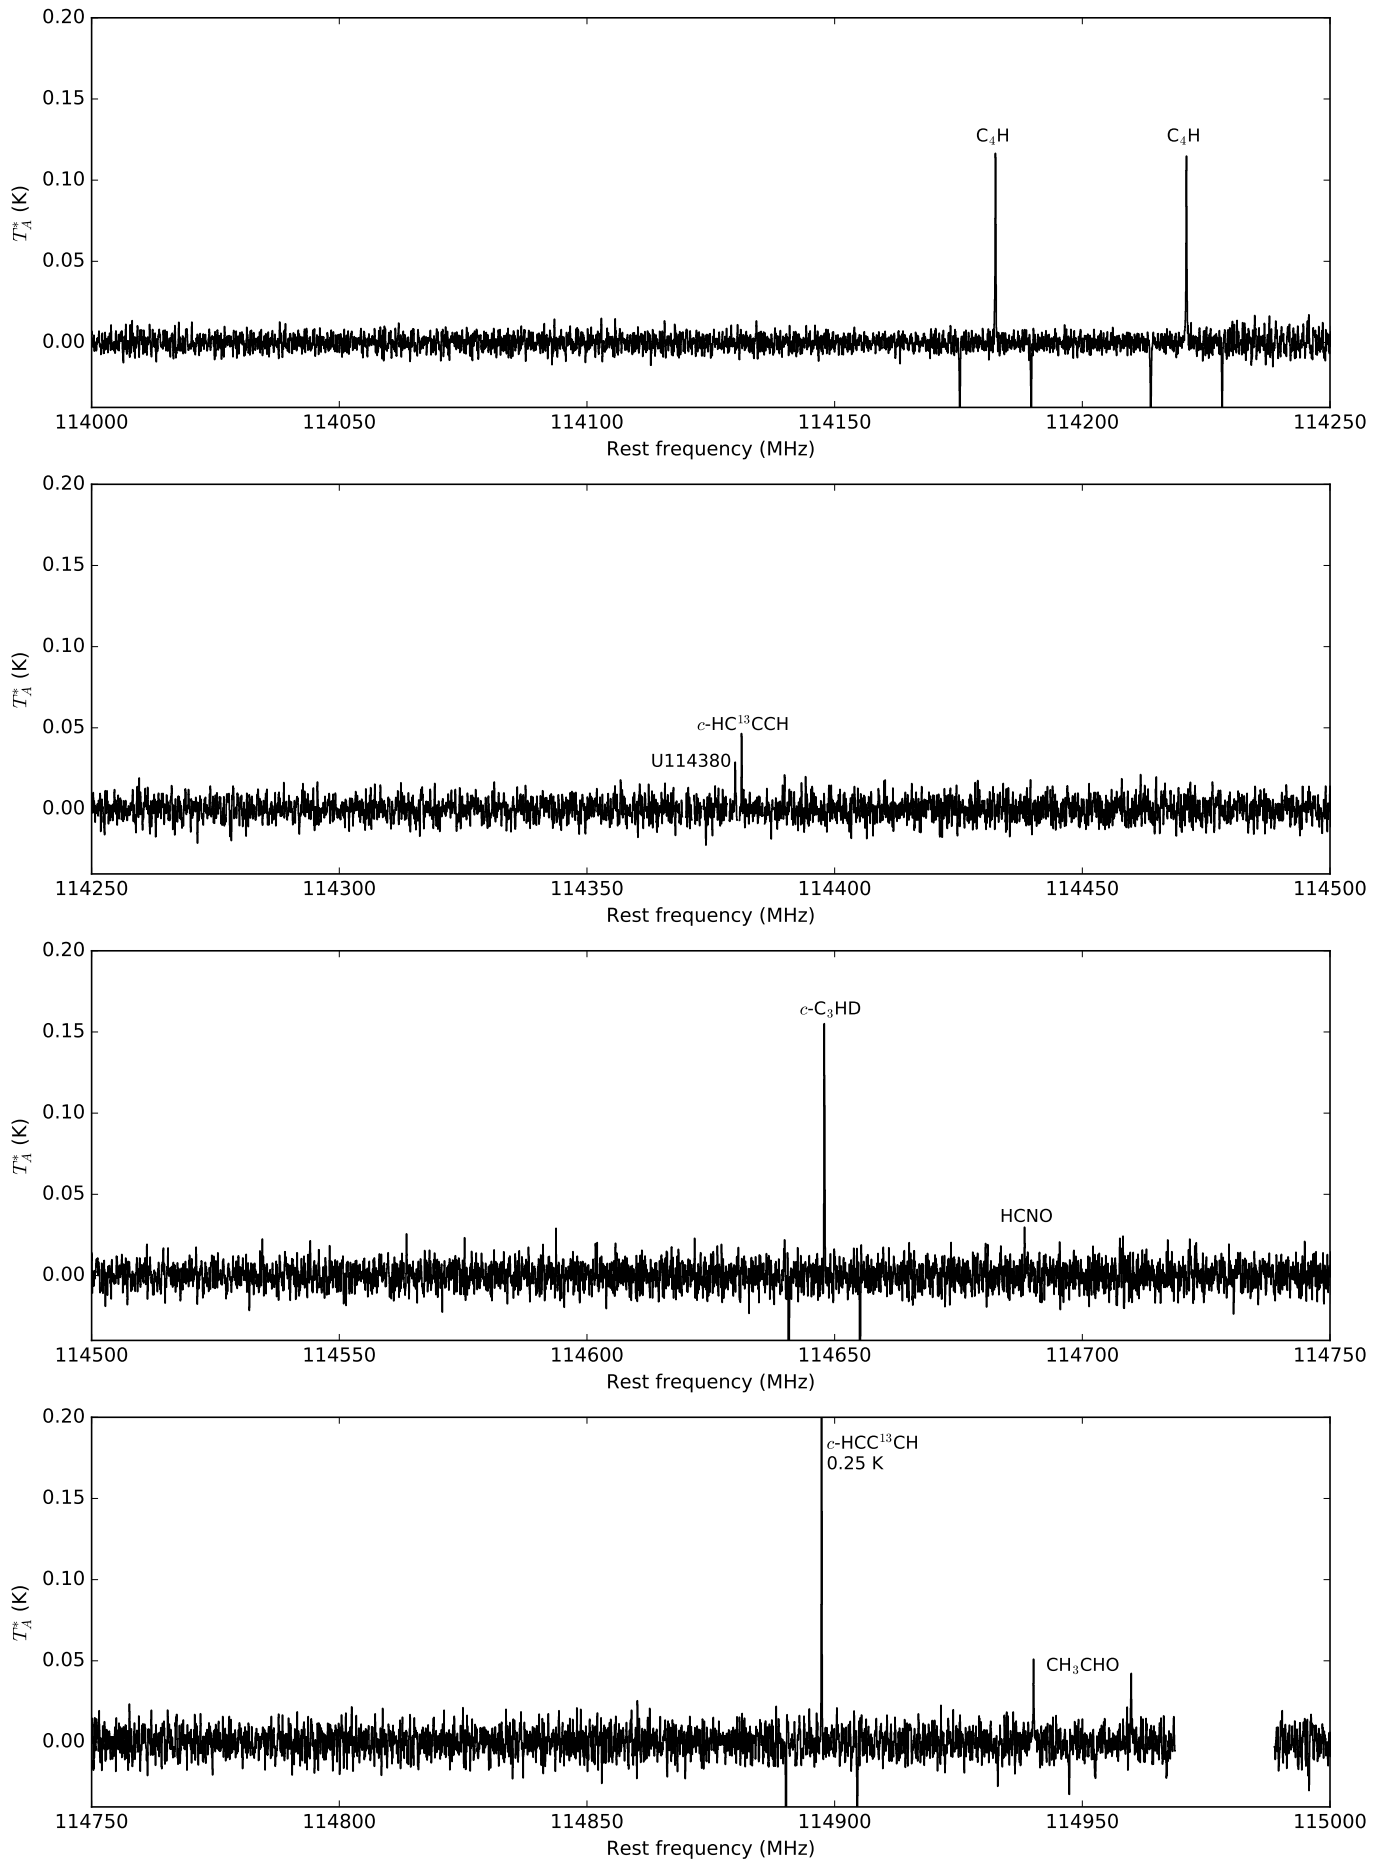

Fig. A.1. Continued

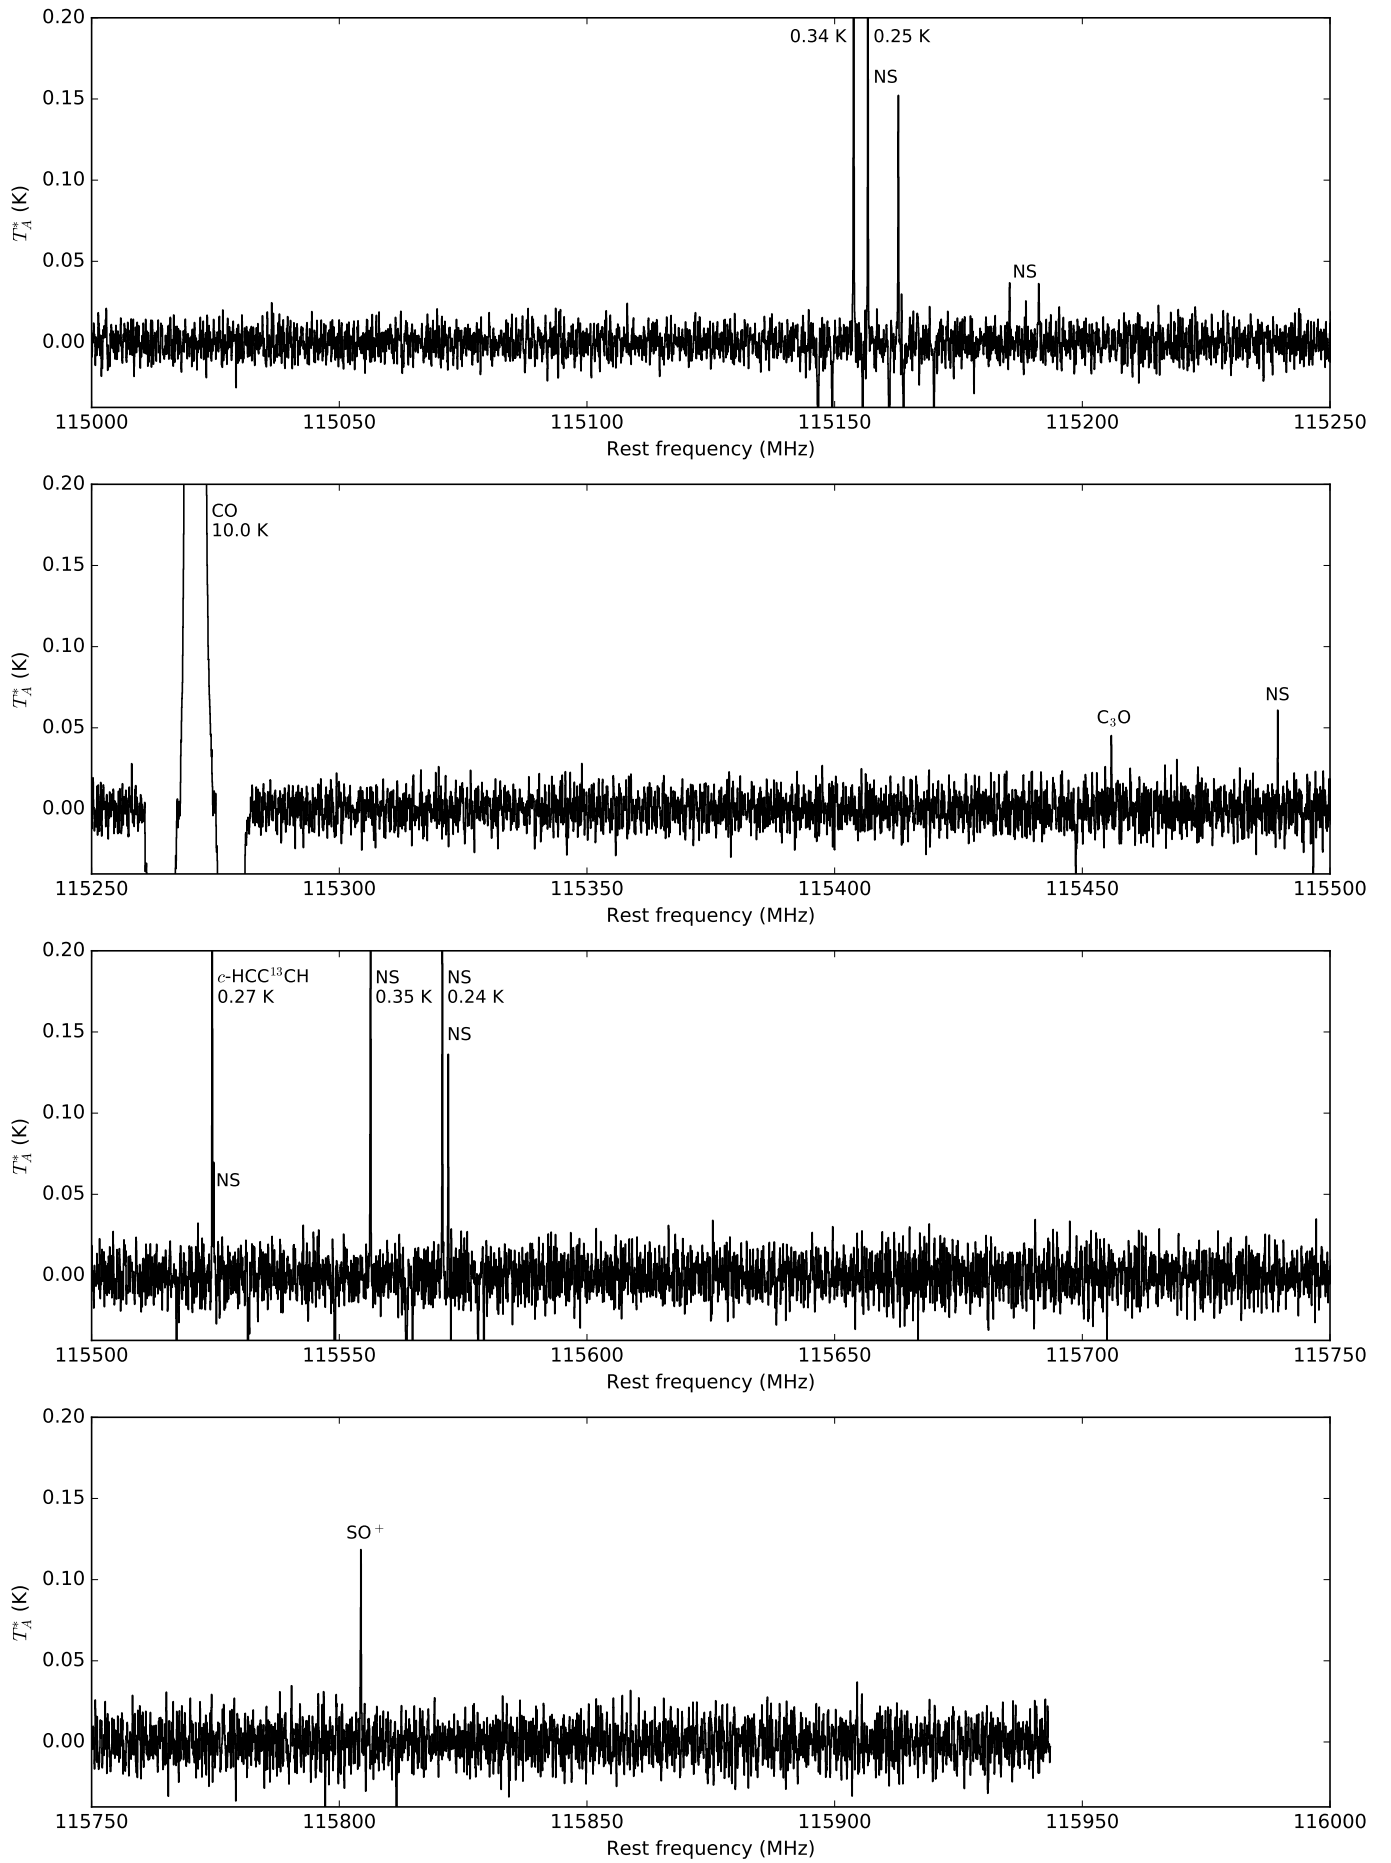

**Fig. A.1.** Continued  
Article number, page 70 of 70
